# Supplementary material for: Dynamics of dark fermentation microbial communities in the light of lactate and butyrate production
Source: PubMed Central journal article supplement (PMC8281708; doi:10.1186/s40168-021-01105-x), 2021-07-14

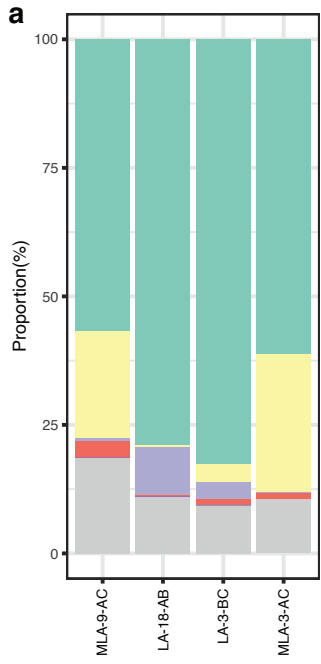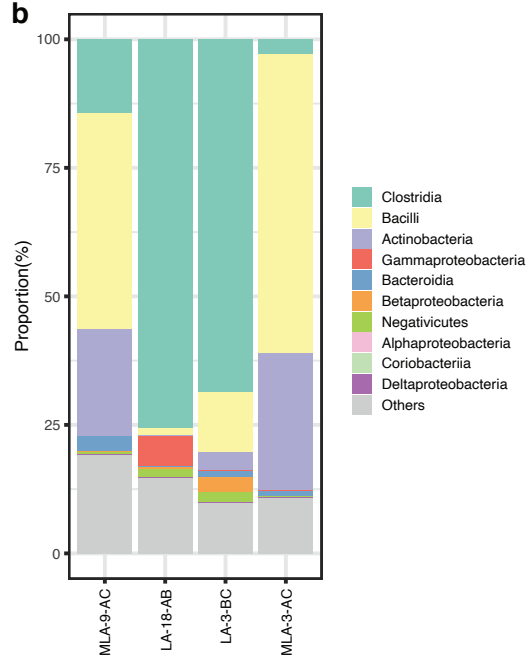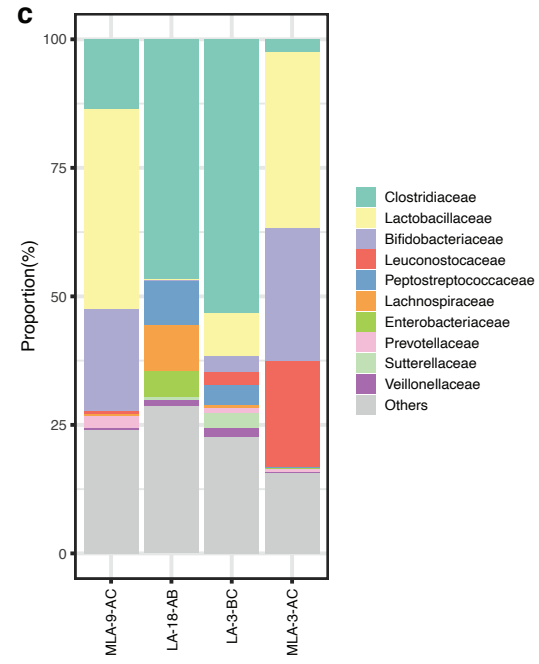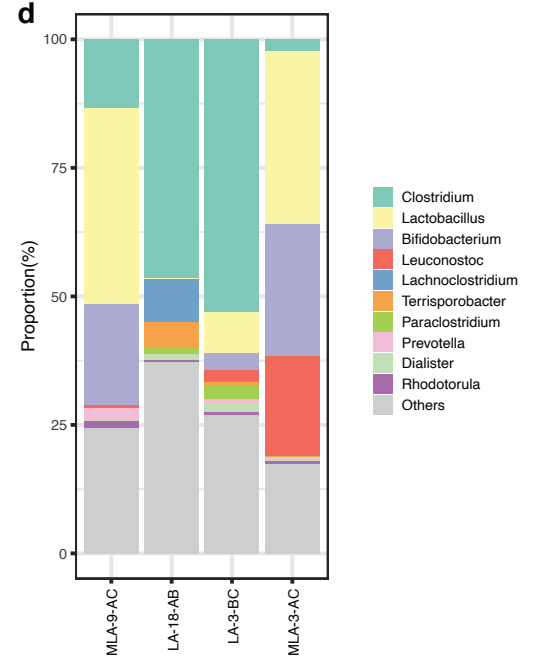

Supplement: 40168_2021_1105_MOESM6_ESM.pdf [file 40168_2021_1105_MOESM6_ESM.pdf]
