# Supplementary material for: Dynamics of dark fermentation microbial communities in the light of lactate and butyrate production
Source: Microbiome. 2021 Jul 14;9:158. doi: 10.1186/s40168-021-01105-x (PMC8281708; doi:10.1186/s40168-021-01105-x)
Supplement: Supplementary file 2 — Additional file 1. Statistical analysis of bacterial growth (OD600nm), pH of the digestive liquids and the non-gaseous fermentation products. The STATISTICA (version 10.0) computer software (StatSoft, Inc.) was used. All variables were examined for normality and homogeneity of variance. Tukey's HSD (honestly significant difference) test was applied after ANOVA analysis to compare statistical significance among the variables in experiments. Statistical significance was considered at p < 0.05. [file 40168_2021_1105_MOESM2_ESM.xlsx]

## Sheet: Experiment M
Test RIR Tukeya; variable: pH The marked differences are significant with p < 0.05000								ANNOVA: variance analysis The marked differences are significant with p < 0.05000
	Day 3	Day 6	Day 9	Day 12	Day 15	Day 18			SS	df	MS	SS error	df error	MS error	F-value	p-value
Day 3		0.0584508	0.000359229	0.000163868	0.000316008	0.000192684		Ph	0.373578	5	0.0747156	0.0396667	12	0.00330556	22.603	1.0084e-05
Day 6	0.0584508		0.04092	0.00122062	0.0322236	0.00547737		lactic acid	29908.8	5	5981.76	3410.34	12	284.195	21.0481	1.46915e-05
Day 9	0.000359229	0.04092		0.304442	0.99999	0.825584		Acetic acid	388.965	5	77.793	490.603	12	40.8836	1.90279	0.167551
Day 12	0.000163868	0.00122062	0.304442		0.367144	0.911266		Butyric Acid	2946.15	5	589.23	2925.12	12	243.76	2.41726	0.0976625
Day 15	0.000316008	0.0322236	0.99999	0.367144		0.886002		Ethanol	27735.8	5	5547.17	41459.9	12	3454.99	1.60555	0.232118
Day 18	0.000192684	0.00547737	0.825584	0.911266	0.886002
Test RIR Tukeya;variable: lactic acid The marked differences are significant with p < 0.05000
	Day 3	Day 6	Day 9	Day 12	Day 15	Day 18
Day 3		0.0660136	0.00054337	0.000162854	0.000536019	0.000251179
Day 6	0.0660136		0.074072	0.000935394	0.0725628	0.0157456
Day 9	0.00054337	0.074072		0.133175	1	0.932884
Day 12	0.000162854	0.000935394	0.133175		0.13582	0.480378
Day 15	0.000536019	0.0725628	1	0.13582		0.936332
Day 18	0.000251179	0.0157456	0.932884	0.480378	0.936332

## Sheet: Experiment ML
Test RIR Tukeya; variable: pH The marked differences are significant with p < 0.05000									ANNOVA: variance analysis The marked differences are significant with p < 0.05000
	Day 3	Day 6	Day 9	Day 12	Day 15	Day 18				SS	df	MS	SS error	df error	MS error	F-value	p-value
Day 3		0.928024	0.999903	0.780637	0.171441	0.606544			Ph	68395.9	5	13679.2	25005.2	12	2083.77	6.56464	0.00365405
Day 6	0.928024		0.845093	0.289095	0.0370978	0.183511			lactic acid	81350.2	5	16270	33117.2	12	2759.76	5.89545	0.00561254
Day 9	0.999903	0.845093		0.882307	0.239117	0.73322			Acetic acid	388.449	5	77.6898	686.599	12	57.2166	1.35782	0.306333
Day 12	0.780637	0.289095	0.882307		0.780637	0.999499			Butyric Acid	48996.6	5	9799.31	20398.3	12	1699.86	5.76478	0.00612492
Day 15	0.171441	0.0370978	0.239117	0.780637		0.914187			Ethanol	68395.9	5	13679.2	25005.2	12	2083.77	6.56464	0.00365405
Day 18	0.606544	0.183511	0.73322	0.999499	0.914187
Test RIR Tukeya;variable: lactic acid The marked differences are significant with p < 0.05000
	Day 3	Day 6	Day 9	Day 12	Day 15	Day 18
Day 3		0.83652	0.998895	0.582103	0.0624914	0.120615
Day 6	0.83652		0.640676	0.117646	0.00860246	0.0168634
Day 9	0.998895	0.640676		0.787396	0.114199	0.212867
Day 12	0.582103	0.117646	0.787396		0.629974	0.843564
Day 15	0.0624914	0.00860246	0.114199	0.629974		0.998277
Day 18	0.120615	0.0168634	0.212867	0.843564	0.998277
Test RIR Tukeya;variable: butyric acid The marked differences are significant with p < 0.05000
	Day 3	Day 6	Day 9	Day 12	Day 15	Day 18
Day 3		0.733389	0.716483	0.197966	0.0116689	0.0113989
Day 6	0.733389		1	0.866565	0.117654	0.115067
Day 9	0.716483	1		0.878956	0.123558	0.120854
Day 12	0.197966	0.866565	0.878956		0.5427	0.534845
Day 15	0.0116689	0.117654	0.123558	0.5427		1
Day 18	0.0113989	0.115067	0.120854	0.534845	1
Test RIR Tukeya;variable: ethanol The marked differences are significant with p < 0.05000
	Day 3	Day 6	Day 9	Day 12	Day 15	Day 18
Day 3		0.567001	0.0240341	0.114058	0.00576129	0.00713909
Day 6	0.567001		0.342001	0.839692	0.0945385	0.116921
Day 9	0.0240341	0.342001		0.928834	0.94925	0.974494
Day 12	0.114058	0.839692	0.928834		0.501577	0.57587
Day 15	0.00576129	0.0945385	0.94925	0.501577		0.999993
Day 18	0.00713909	0.116921	0.974494	0.57587	0.999993

## Sheet: Experiment MLA
Test RIR Tukeya; variable: pH The marked differences are significant with p < 0.05000									ANNOVA: variance analysis The marked differences are significant with p < 0.05000
	Day 3	Day 6	Day 9	Day 12	Day 15	Day 18				SS	df	MS	SS error	df error	MS error	F-value	p-value
Day 3		0.00015886	0.000158849	0.576977	0.000218758	0.99985			Ph	2.47287	5	0.494573	0.0835333	12	0.00696111	71.048	1.71044e-08
Day 6	0.00015886		0.899796	0.000159189	0.00682604	0.000158868			lactic acid	196184	5	39236.8	127703	12	10642	3.68699	0.0297356
Day 9	0.000158849	0.899796		0.000158893	0.00140572	0.00015885			Acetic acid	56452.9	5	11290.6	13922.8	12	1160.24	9.73127	0.000665498
Day 12	0.576977	0.000159189	0.000158893		0.000948969	0.716314			Butyric Acid	217622	5	43524.4	65436.4	12	5453.04	7.98168	0.0016078
Day 15	0.000218758	0.00682604	0.00140572	0.000948969		0.00024443			Ethanol	120767	5	24153.4	5413.29	12	451.107	53.5425	8.64249e-08
Day 18	0.99985	0.000158868	0.00015885	0.716314	0.00024443
Test RIR Tukeya;variable: lactic acid The marked differences are significant with p < 0.05000
	Day 3	Day 6	Day 9	Day 12	Day 15	Day 18
Day 3		0.0459777	0.151087	0.24803	0.0604813	0.932481
Day 6	0.0459777		0.974078	0.887072	0.999979	0.202967
Day 9	0.151087	0.974078		0.999343	0.991576	0.52548
Day 12	0.24803	0.887072	0.999343		0.939822	0.714093
Day 15	0.0604813	0.999979	0.991576	0.939822		0.257761
Day 18	0.932481	0.202967	0.52548	0.714093	0.257761
Test RIR Tukeya;variable: acetic acid The marked differences are significant with p < 0.05000
	Day 3	Day 6	Day 9	Day 12	Day 15	Day 18
Day 3		0.110347	0.798052	0.96323	0.110665	0.0831667
Day 6	0.110347		0.605447	0.355697	1	0.000880962
Day 9	0.798052	0.605447		0.996456	0.60648	0.010035
Day 12	0.96323	0.355697	0.996456		0.356523	0.0220236
Day 15	0.110665	1	0.60648	0.356523		0.000882933
Day 18	0.0831667	0.000880962	0.010035	0.0220236	0.000882933
Test RIR Tukeya;variable: butyric acid The marked differences are significant with p < 0.05000
	Day 3	Day 6	Day 9	Day 12	Day 15	Day 18
Day 3		0.00240153	0.00475139	0.0593047	0.0232723	0.667394
Day 6	0.00240153		0.997464	0.417954	0.727623	0.0279087
Day 9	0.00475139	0.997464		0.661028	0.921989	0.0582141
Day 12	0.0593047	0.417954	0.661028		0.99221	0.527136
Day 15	0.0232723	0.727623	0.921989	0.99221		0.262403
Day 18	0.667394	0.0279087	0.0582141	0.527136	0.262403
Test RIR Tukeya;variable: ethanol The marked differences are significant with p < 0.05000
	Day 3	Day 6	Day 9	Day 12	Day 15	Day 18
Day 3		0.000158849	0.000158851	0.000159332	0.000158849	0.000158856
Day 6	0.000158849		0.978314	0.0703814	0.999982	0.861423
Day 9	0.000158851	0.978314		0.212826	0.993079	0.997785
Day 12	0.000159332	0.0703814	0.212826		0.0912696	0.382112
Day 15	0.000158849	0.999982	0.993079	0.0912696		0.919683
Day 18	0.000158856	0.861423	0.997785	0.382112	0.919683

## Sheet: EXP MLA_without day 9
Test RIR Tukeya; variable: pH The marked differences are significant with p < 0.05000									ANNOVA: variance analysis The marked differences are significant with p < 0.05000
	Day 3	Day 6	Day 12	Day 15	Day 18					SS	df	MS	SS error	df error	MS error	F-value	p-value
Day 3		0.000176706	0.573816	0.00044874	0.999376				Ph	1.57287	4	0.393217	0.0834667	10	0.00834667	47.1106	1.86787e-06
Day 6	0.000176706		0.00018264	0.0132772	0.000176974				lactic acid	187649	4	46912.2	33157.6	10	3315.76	14.1483	0.000400817
Day 12	0.573816	0.00018264		0.00239183	0.699647				Acetic acid	55835.8	4	13959	9765.17	10	976.517	14.2946	0.000384131
Day 15	0.00044874	0.0132772	0.00239183		0.000543133				Butyric Acid	180660	4	45165.1	15797.2	10	1579.72	28.5905	1.88188e-05
Day 18	0.999376	0.000176974	0.699647	0.000543133					Ethanol	114594	4	28648.4	3654.43	10	365.443	78.3936	1.64797e-07
Test RIR Tukeya;variable: lactic acid The marked differences are significant with p < 0.05000
	Day 3	Day 6	Day 12	Day 15	Day 18
Day 3		0.00095776	0.0123091	0.00136147	0.498074
Day 6	0.00095776		0.374614	0.998109	0.00854129
Day 12	0.0123091	0.374614		0.524315	0.154949
Day 15	0.00136147	0.998109	0.524315		0.0132349
Day 18	0.498074	0.00854129	0.154949	0.0132349
Test RIR Tukeya;variable: acetic acid The marked differences are significant with p < 0.05000
	Day 3	Day 6	Day 12	Day 15	Day 18
Day 3		0.0635487	0.903055	0.0637411	0.0473564
Day 6	0.0635487		0.230689	1	0.000652163
Day 12	0.903055	0.230689		0.231317	0.0125515
Day 15	0.0637411	1	0.231317		0.000653424
Day 18	0.0473564	0.000652163	0.0125515	0.000653424
Test RIR Tukeya;variable: butyric acid The marked differences are significant with p < 0.05000
	Day 3	Day 6	Day 12	Day 15	Day 18
Day 3		0.000181193	0.00102764	0.000378482	0.106851
Day 6	0.000181193		0.0295389	0.144171	0.000446854
Day 12	0.00102764	0.0295389		0.834292	0.0530274
Day 15	0.000378482	0.144171	0.834292		0.0108845
Day 18	0.106851	0.000446854	0.0530274	0.0108845
Test RIR Tukeya;variable: ethanol The marked differences are significant with p < 0.05000
	Day 3	Day 6	Day 12	Day 15	Day 18
Day 3		0.000176092	0.000176444	0.000176092	0.000176098
Day 6	0.000176092		0.036001	0.999756	0.72401
Day 12	0.000176444	0.036001		0.0472923	0.236717
Day 15	0.000176092	0.999756	0.0472923		0.814958
Day 18	0.000176098	0.72401	0.236717	0.814958

## Sheet: Experiment LA
Test RIR Tukeya; variable: pH The marked differences are significant with p < 0.05000										ANNOVA: variance analysis The marked differences are significant with p < 0.05000
	Day 3	Day 6	Day 9	Day 12	Day 15	Day 18					SS	df	MS	SS error	df error	MS error	F-value	p-value
Day 3		0.000167831	0.000158976	0.000158851	0.000158848	0.000158848				Ph	1.09676	5	0.219352	0.0456	12	0.0038	57.7243	5.63014e-08
Day 6	0.000167831		0.258842	0.0127664	0.00388739	0.000779075				lactic acid	27393.1	5	5478.62	527.781	12	43.9818	124.566	6.52731e-10
Day 9	0.000158976	0.258842		0.470717	0.175262	0.0278169				Acetic acid	2499.52	5	499.905	3501.89	12	291.824	1.71304	0.206097
Day 12	0.000158851	0.0127664	0.470717		0.974416	0.470717				Butyric Acid	30494.3	5	6098.86	7840.51	12	653.376	9.33438	0.000804121
Day 15	0.000158848	0.00388739	0.175262	0.974416		0.861694				Ethanol	74.3927	5	14.8785	29.6199	12	2.46833	6.02778	0.0051436
Day 18	0.000158848	0.000779075	0.0278169	0.470717	0.861694
Test RIR Tukeya;variable: lactic acid The marked differences are significant with p < 0.05000
	Day 3	Day 6	Day 9	Day 12	Day 15	Day 18
Day 3		0.000158848	0.000158848	0.000158848	0.000158848	0.000158848
Day 6	0.000158848		0.758692	0.533904	1	0.999999
Day 9	0.000158848	0.758692		0.079479	0.779533	0.798688
Day 12	0.000158848	0.533904	0.079479		0.511574	0.490698
Day 15	0.000158848	1	0.779533	0.511574		1
Day 18	0.000158848	0.999999	0.798688	0.490698	1
Test RIR Tukeya;variable: butyric acid The marked differences are significant with p < 0.05000
	Day 3	Day 6	Day 9	Day 12	Day 15	Day 18
Day 3		0.00855105	0.00104521	0.00309746	0.00163593	0.00279924
Day 6	0.00855105		0.735627	0.986072	0.888054	0.978527
Day 9	0.00104521	0.735627		0.970991	0.999411	0.980427
Day 12	0.00309746	0.986072	0.970991		0.997766	1
Day 15	0.00163593	0.888054	0.999411	0.997766		0.999018
Day 18	0.00279924	0.978527	0.980427	1	0.999018
Test RIR Tukeya;variable: ethanol The marked differences are significant with p < 0.05000
	Day 3	Day 6	Day 9	Day 12	Day 15	Day 18
Day 3		0.99173	0.380755	0.0579608	1	0.999997
Day 6	0.99173		0.689787	0.0224555	0.994895	0.981354
Day 9	0.380755	0.689787		0.00210279	0.408398	0.329042
Day 12	0.0579608	0.0224555	0.00210279		0.0527652	0.0698728
Day 15	1	0.994895	0.408398	0.0527652		0.999976
Day 18	0.999997	0.981354	0.329042	0.0698728	0.999976

## Sheet: Experiment SLA
Test RIR Tukeya; variable: pH The marked differences are significant with p < 0.05000										ANNOVA: variance analysis The marked differences are significant with p < 0.05000
	Day 3	Day 6	Day 9	Day 12	Day 15	Day 18					SS	df	MS	SS error	df error	MS error	F-value	p-value
Day 3		0.00215113	0.0224025	0.998867	0.992925	0.655982				Ph	6.49216	5	1.29843	1.68333	12	0.140278	9.25615	0.000835264
Day 6	0.00215113		0.699211	0.00379572	0.00501082	0.025493				lactic acid	252088	5	50417.5	201955	12	16829.6	2.99576	0.0554258
Day 9	0.0224025	0.699211		0.0418345	0.0560237	0.26146				Acetic acid	39168.1	5	7833.62	25794.5	12	2149.54	3.64433	0.0308512
Day 12	0.998867	0.00379572	0.0418345		0.999972	0.849016				Butyric Acid	190864	5	38172.8	174743	12	14561.9	2.62141	0.079575
Day 15	0.992925	0.00501082	0.0560237	0.999972		0.915536				Ethanol	125714	5	25142.9	6548.58	12	545.715	46.0733	2.02411e-07
Day 18	0.655982	0.025493	0.26146	0.849016	0.915536
Test RIR Tukeya; variable: acetic acid The marked differences are significant with p < 0.05000
	Day 3	Day 6	Day 9	Day 12	Day 15	Day 18
Day 3		0.128156	0.868752	0.999863	0.999634	0.855859
Day 6	0.128156		0.570267	0.0870946	0.201442	0.0193527
Day 9	0.868752	0.570267		0.754334	0.959154	0.285293
Day 12	0.999863	0.0870946	0.754334		0.993554	0.939411
Day 15	0.999634	0.201442	0.959154	0.993554		0.708287
Day 18	0.855859	0.0193527	0.285293	0.939411	0.708287
Test RIR Tukeya; variable: ethanol The marked differences are significant with p < 0.05000
	Day 3	Day 6	Day 9	Day 12	Day 15	Day 18
Day 3		0.00015905	0.000158857	0.00015888	0.000158906	0.000158854
Day 6	0.00015905		0.645743	0.933351	0.986058	0.545828
Day 9	0.000158857	0.645743		0.987133	0.936481	0.999972
Day 12	0.00015888	0.933351	0.987133		0.999666	0.962797
Day 15	0.000158906	0.986058	0.936481	0.999666		0.878348
Day 18	0.000158854	0.545828	0.999972	0.962797	0.878348
	Test RIR Tukeya; variable: butyric acid The marked differences are significant with p < 0.05000						ANNOVA: variance analysis, selected days The marked differences are significant with p < 0.05000
		Day 3	Day 6	Day 9				SS	df	MS	SS error	df error	MS error	F-value	p-value
	Day 3		0.000440756	0.000298794			Butyric Acid	185171	2	92585.4	8461.88	6	1410.31	65.6488	8.34573e-05
	Day 6	0.000440756		0.34386
	Day 9	0.000298794	0.34386

## Sheet: OD_between experiments
ANNOVA: variance analysis; variable: OD600 between experiments in time The marked differences are significant with p < 0.05000
	SS	df	MS	SS error	df error	MS error	F-value	p-value
Day 3	13.3852	4	3.34631	2.23027	10	0.223027	15.0041	0.00031414
Day 6	13.8514	4	3.46286	1.36328	10	0.136328	25.4009	3.20667e-05
Day 9	8.40487	4	2.10122	1.10431	10	0.110431	19.0274	0.000114468
Day 12	8.04664	4	2.01166	2.11966	10	0.211966	9.4905	0.00195334
Day 15	11.5274	4	2.88185	2.11589	10	0.211589	13.62	0.000468726
Day 18	8.725	4	2.18125	0.580153	10	0.0580153	37.5978	5.35891e-06
Test RIR Tukeya; Day 3 The marked differences are significant with p < 0.05000
	Experiment M	Experiment ML	Experiment MLA	Experiment LA	Experiment SLA
Experiment M		0.90953	0.543706	0.00317019	0.870567
Experiment ML	0.90953		0.945532	0.00109503	0.99997
Experiment MLA	0.543706	0.945532		0.000511547	0.968062
Experiment LA	0.00317019	0.00109503	0.000511547		0.000971841
Experiment SLA	0.870567	0.99997	0.968062	0.000971841
Test RIR Tukeya; Day 6 The marked differences are significant with p < 0.05000
	Experiment M	Experiment ML	Experiment MLA	Experiment LA	Experiment SLA
Experiment M		0.10589	0.809428	0.000258277	0.999985
Experiment ML	0.10589		0.019852	0.00423091	0.120797
Experiment MLA	0.809428	0.019852		0.000193951	0.765336
Experiment LA	0.000258277	0.00423091	0.000193951		0.000268773
Experiment SLA	0.999985	0.120797	0.765336	0.000268773
Test RIR Tukeya; Day 9 The marked differences are significant with p < 0.05000
	Experiment M	Experiment ML	Experiment MLA	Experiment LA	Experiment SLA
Experiment M		0.0446022	0.992409	0.000520758	0.999998
Experiment ML	0.0446022		0.0232545	0.0465077	0.0410231
Experiment MLA	0.992409	0.0232545		0.000367761	0.995501
Experiment LA	0.000520758	0.0465077	0.000367761		0.000496793
Experiment SLA	0.999998	0.0410231	0.995501	0.000496793
Test RIR Tukeya; Day 12 The marked differences are significant with p < 0.05000
	Experiment M	Experiment ML	Experiment MLA	Experiment LA	Experiment SLA
Experiment M		0.0827885	0.995643	0.0010151	0.999999
Experiment ML	0.0827885		0.0461441	0.0859221	0.0768469
Experiment MLA	0.995643	0.0461441		0.000623759	0.997434
Experiment LA	0.0010151	0.0859221	0.000623759		0.000952697
Experiment SLA	0.999999	0.0768469	0.997434	0.000952697
Test RIR Tukeya; Day 15 The marked differences are significant with p < 0.05000
	Experiment M	Experiment ML	Experiment MLA	Experiment LA	Experiment SLA
Experiment M		0.646932	0.571756	0.00671845	0.695764
Experiment ML	0.646932		0.99992	0.00108496	0.999985
Experiment MLA	0.571756	0.99992		0.000925487	0.999411
Experiment LA	0.00671845	0.00108496	0.000925487		0.00119737
Experiment SLA	0.695764	0.999985	0.999411	0.00119737
Test RIR Tukeya; Day 18 The marked differences are significant with p < 0.05000
	Experiment M	Experiment ML	Experiment MLA	Experiment LA	Experiment SLA
Experiment M		0.99176	0.97962	0.000178672	0.901758
Experiment ML	0.99176		0.999949	0.000181064	0.991132
Experiment MLA	0.97962	0.999949		0.000182033	0.997382
Experiment LA	0.000178672	0.000181064	0.000182033		0.000185644
Experiment SLA	0.901758	0.991132	0.997382	0.000185644

## Sheet: pH_between experiments
ANNOVA: variance analysis; variable: pH between experiments in time The marked differences are significant with p < 0.05000
	SS	df	MS	SS error	df error	MS error	F-value	p-value
Day 3	12.1989	4	3.04972	0.0228667	10	0.00228667	1333.7	1.37348e-13
Day 6	20.5444	4	5.1361	0.117333	10	0.0117333	437.736	3.52667e-11
Day 9	21.1089	4	5.27722	0.0320667	10	0.00320667	1645.7	4.81116e-14
Day 12	22.2222	4	5.55556	0.528667	10	0.0528667	105.086	3.98636e-08
Day 15	21.2937	4	5.32342	0.6082	10	0.06082	87.5275	9.67847e-08
Day 18	23.0358	4	5.75895	0.642733	10	0.0642733	89.6009	8.64161e-08
Test RIR Tukeya; Day 3 The marked differences are significant with p < 0.05000
	Experiment M	Experiment ML	Experiment MLA	Experiment LA	Experiment SLA
Experiment M		0.000176575	0.000176092	0.000176091	0.000176092
Experiment ML	0.000176575		0.00870894	0.000176091	0.00601053
Experiment MLA	0.000176092	0.00870894		0.000176091	0.998922
Experiment LA	0.000176091	0.000176091	0.000176091		0.000176091
Experiment SLA	0.000176092	0.00601053	0.998922	0.000176091
Test RIR Tukeya; Day 6 The marked differences are significant with p < 0.05000
	Experiment M	Experiment ML	Experiment MLA	Experiment LA	Experiment SLA
Experiment M		0.00125572	0.000176091	0.000176091	0.000176091
Experiment ML	0.00125572		0.000176202	0.000176091	0.000176091
Experiment MLA	0.000176091	0.000176202		0.000176091	0.000188517
Experiment LA	0.000176091	0.000176091	0.000176091		0.000189955
Experiment SLA	0.000176091	0.000176091	0.000188517	0.000189955
Test RIR Tukeya; Day 9 The marked differences are significant with p < 0.05000
	Experiment M	Experiment ML	Experiment MLA	Experiment LA	Experiment SLA
Experiment M		0.000176092	0.000176091	0.000176091	0.000176091
Experiment ML	0.000176092		0.000176091	0.000176091	0.000176091
Experiment MLA	0.000176091	0.000176091		0.000176091	0.000799706
Experiment LA	0.000176091	0.000176091	0.000176091		0.000176091
Experiment SLA	0.000176091	0.000176091	0.000799706	0.000176091
Test RIR Tukeya; Day 12 The marked differences are significant with p < 0.05000
	Experiment M	Experiment ML	Experiment MLA	Experiment LA	Experiment SLA
Experiment M		0.00350483	0.000985715	0.000176091	0.000922814
Experiment ML	0.00350483		0.844349	0.000176093	0.819784
Experiment MLA	0.000985715	0.844349		0.000176101	0.999998
Experiment LA	0.000176091	0.000176093	0.000176101		0.000176102
Experiment SLA	0.000922814	0.819784	0.999998	0.000176102
Test RIR Tukeya; Day 15 The marked differences are significant with p < 0.05000
	Experiment M	Experiment ML	Experiment MLA	Experiment LA	Experiment SLA
Experiment M		0.0056796	0.000353239	0.000176091	0.00197288
Experiment ML	0.0056796		0.179072	0.000176107	0.931374
Experiment MLA	0.000353239	0.179072		0.000177133	0.490051
Experiment LA	0.000176091	0.000176107	0.000177133		0.000176155
Experiment SLA	0.00197288	0.931374	0.490051	0.000176155
Test RIR Tukeya; Day 18 The marked differences are significant with p < 0.05000
	Experiment M	Experiment ML	Experiment MLA	Experiment LA	Experiment SLA
Experiment M		0.00805241	0.00494446	0.000176091	0.000387929
Experiment ML	0.00805241		0.99674	0.000176101	0.152455
Experiment MLA	0.00494446	0.99674		0.000176109	0.24693
Experiment LA	0.000176091	0.000176101	0.000176109		0.000176898
Experiment SLA	0.000387929	0.152455	0.24693	0.000176898

## Sheet: Butyric _between experiments
ANNOVA: variance analysis; variable: butyric acid experiments in time The marked differences are significant with p < 0.05000
	SS	df	MS	SS error	df error	MS error	F-value	p-value
Day 3	4.40873	4	1.10218	1.58428	10	0.158428	6.95701	0.00603966
Day 6	108.734	4	27.1835	10.6531	10	1.06531	25.5168	3.14193e-05
Day 9	121.578	4	30.3945	26.9801	10	2.69801	11.2655	0.00100605
Day 12	36.5084	4	9.12711	29.3877	10	2.93877	3.10576	0.0665097
Day 15	43.6226	4	10.9056	27.0923	10	2.70923	4.02537	0.0337135
Day 18	41.5307	4	10.3827	35.9613	10	3.59613	2.88718	0.0791958
Test RIR Tukeya; Day 3 The marked differences are significant with p < 0.05000
	Experiment M	Experiment ML	Experiment MLA	Experiment LA	Experiment SLA
Experiment M		0.920966	0.99197	0.0284431	0.420371
Experiment ML	0.920966		0.994636	0.00833224	0.13969
Experiment MLA	0.99197	0.994636		0.0147933	0.242646
Experiment LA	0.0284431	0.00833224	0.0147933		0.399657
Experiment SLA	0.420371	0.13969	0.242646	0.399657
Test RIR Tukeya; Day 6 The marked differences are significant with p < 0.05000
	Experiment M	Experiment ML	Experiment MLA	Experiment LA	Experiment SLA
Experiment M		0.999999	0.000353357	0.0845825	0.000374763
Experiment ML	0.999999		0.000363732	0.0901541	0.000386382
Experiment MLA	0.000353357	0.000363732		0.0118379	0.999987
Experiment LA	0.0845825	0.0901541	0.0118379		0.0134173
Experiment SLA	0.000374763	0.000386382	0.999987	0.0134173
Test RIR Tukeya; Day 9 The marked differences are significant with p < 0.05000
	Experiment M	Experiment ML	Experiment MLA	Experiment LA	Experiment SLA
Experiment M		0.999936	0.0131366	0.189303	0.00254824
Experiment ML	0.999936		0.0158969	0.22614	0.00301679
Experiment MLA	0.0131366	0.0158969		0.448397	0.777375
Experiment LA	0.189303	0.22614	0.448397		0.0911599
Experiment SLA	0.00254824	0.00301679	0.777375	0.0911599
ANNOVA: variance analysis; Day 12 The marked differences are significant with p < 0.05000									Test RIR Tukeya; Day 12 The marked differences are significant with p < 0.05000
SS	df	MS	SS error	df error	MS error	F-value	p-value			Experiment M	Experiment ML	Experiment MLA	Experiment LA
36.5084	4	9.12711	29.3877	10	2.93877	3.10576	0.0665097		Experiment M		0.120593	0.000522808	0.00138406
									Experiment ML	0.120593		0.00567491	0.029524
									Experiment MLA	0.000522808	0.00567491		0.605222
									Experiment LA	0.00138406	0.029524	0.605222
Test RIR Tukeya; Day 15 The marked differences are significant with p < 0.05000									Test RIR Tukeya; Day 15 The marked differences are significant with p < 0.05000
	Experiment M	Experiment ML	Experiment MLA	Experiment LA	Experiment SLA					Experiment M	Experiment ML	Experiment MLA	Experiment LA
Experiment M		0.296933	0.0302941	0.122634	0.0572007				Experiment M		0.0225385	0.000971092	0.00531364
Experiment ML	0.296933		0.56743	0.968284	0.793108				Experiment ML	0.0225385		0.0915252	0.685112
Experiment MLA	0.0302941	0.56743		0.886974	0.993116				Experiment MLA	0.000971092	0.0915252		0.406795
Experiment LA	0.122634	0.968284	0.886974		0.985686				Experiment LA	0.00531364	0.685112	0.406795
Experiment SLA	0.0572007	0.793108	0.993116	0.985686
ANNOVA: variance analysis; Day 18 The marked differences are significant with p < 0.05000									Test RIR Tukeya; Day 18 The marked differences are significant with p < 0.05000
SS	df	MS	SS error	df error	MS error	F-value	p-value			Experiment M	Experiment ML	Experiment MLA	Experiment LA
41.5307	4	10.3827	35.9613	10	3.59613	2.88718	0.0791958		Experiment M		0.000558542	0.00744159	0.000281003
									Experiment ML	0.000558542		0.103686	0.366699
									Experiment MLA	0.00744159	0.103686		0.00967244
									Experiment LA	0.000281003	0.366699	0.00967244

## Sheet: Propionic_between exp
ANNOVA: variance analysis; variable: propionic acid between experiments in time The marked differences are significant with p < 0.05000
	SS	df	MS	SS error	df error	MS error	F-value	p-value
Day 3	0.676808	4	0.169202	0.0395985	10	0.00395985	42.7294	2.95303e-06
Day 6	0.425897	4	0.106474	0.128432	10	0.0128432	8.29032	0.00323231
Day 9	0.26853	4	0.0671325	0.12966	10	0.012966	5.17759	0.0160046
Day 12	0.341448	4	0.085362	0.124249	10	0.0124249	6.87024	0.00630799
Day 15	0.218988	4	0.0547469	0.129156	10	0.0129156	4.23881	0.0291284
Day 18	0.345806	4	0.0864516	0.0776875	10	0.00776875	11.1281	0.0010559
Test RIR Tukeya; Day 3 The marked differences are significant with p < 0.05000
	Experiment M	Experiment ML	Experiment MLA	Experiment LA	Experiment SLA
Experiment M		0.204199	0.293012	0.00211048	0.000249165
Experiment ML	0.204199		0.998808	0.000250486	0.000178456
Experiment MLA	0.293012	0.998808		0.000282871	0.000179632
Experiment LA	0.00211048	0.000250486	0.000282871		0.200471
Experiment SLA	0.000249165	0.000178456	0.000179632	0.200471
Test RIR Tukeya; Day 6 The marked differences are significant with p < 0.05000
	Experiment M	Experiment ML	Experiment MLA	Experiment LA	Experiment SLA
Experiment M		0.495102	0.468434	0.0653012	0.781088
Experiment ML	0.495102		0.999998	0.00530834	0.105535
Experiment MLA	0.468434	0.999998		0.00493301	0.0977532
Experiment LA	0.0653012	0.00530834	0.00493301		0.342079
Experiment SLA	0.781088	0.105535	0.0977532	0.342079
Test RIR Tukeya; Day 9 The marked differences are significant with p < 0.05000
	Experiment M	Experiment ML	Experiment MLA	Experiment LA	Experiment SLA
Experiment M		0.585431	0.345375	0.302103	0.813164
Experiment ML	0.585431		0.98856	0.0324858	0.992546
Experiment MLA	0.345375	0.98856		0.0158158	0.894636
Experiment LA	0.302103	0.0324858	0.0158158		0.0621729
Experiment SLA	0.813164	0.992546	0.894636	0.0621729
Test RIR Tukeya; Day 12 The marked differences are significant with p < 0.05000
	Experiment M	Experiment ML	Experiment MLA	Experiment LA	Experiment SLA
Experiment M		0.248486	0.742294	0.663433	0.207822
Experiment ML	0.248486		0.849771	0.032117	0.00726593
Experiment MLA	0.742294	0.849771		0.148462	0.0328547
Experiment LA	0.663433	0.032117	0.148462		0.856144
Experiment SLA	0.207822	0.00726593	0.0328547	0.856144
Test RIR Tukeya; Day 15 The marked differences are significant with p < 0.05000
	Experiment M	Experiment ML	Experiment MLA	Experiment LA	Experiment SLA
Experiment M		0.0816612	0.954711	0.943819	0.999088
Experiment ML	0.0816612		0.225907	0.0263148	0.0558845
Experiment MLA	0.954711	0.225907		0.629465	0.877409
Experiment LA	0.943819	0.0263148	0.629465		0.986929
Experiment SLA	0.999088	0.0558845	0.877409	0.986929
Test RIR Tukeya; Day 18 The marked differences are significant with p < 0.05000
	Experiment M	Experiment ML	Experiment MLA	Experiment LA	Experiment SLA
Experiment M		0.241137	0.999998	0.195824	0.0211637
Experiment ML	0.241137		0.224664	0.00662834	0.000987507
Experiment MLA	0.999998	0.224664		0.21051	0.0228807
Experiment LA	0.195824	0.00662834	0.21051		0.606491
Experiment SLA	0.0211637	0.000987507	0.0228807	0.606491

[truncated: 4 more sheets: Lactic acid_between exp, Lactic acid  ML, MLA, LA, SLA, Acetic_between exp MLA and SLA, Ethanol_between experiments]
