# Supplementary material for: Dynamics of dark fermentation microbial communities in the light of lactate and butyrate production
Source: Microbiome. 2021 Jul 14;9:158. doi: 10.1186/s40168-021-01105-x (PMC8281708; doi:10.1186/s40168-021-01105-x)
Supplement: Supplementary file 3 — Additional file 2. Detailed taxonomic composition (genus level) of the MCs selected in batch experiment based on hypervariable V4 region of the 16S rRNA gene, sequenced on MiSeq platform (Illumina). [file 40168_2021_1105_MOESM3_ESM.xlsx]

## Sheet: Taxa genus Level All samples me
SampleCollection	Taxa	Avg_Relabund mean	sd
Inoculum	Acinetobacter	0.0968603	NA
Inoculum	Aeromonas	0.00403856	NA
Inoculum	Atopobium	0.00423398	NA
Inoculum	Bifidobacterium	0.092431	NA
Inoculum	Caproiciproducens	0.215737	NA
Inoculum	Clostridium_sensu_stricto_1	0.0106175	NA
Inoculum	Clostridium_sensu_stricto_11	0.181931	NA
Inoculum	Clostridium_sensu_stricto_12	0.0639656	NA
Inoculum	Clostridium_sensu_stricto_19	0.00416884	NA
Inoculum	Dialister	0.00182387	NA
Inoculum	Fructobacillus	0.00742574	NA
Inoculum	Klebsiella	0.00130276	NA
Inoculum	Lactobacillus	0.107217	NA
Inoculum	Lactococcus	0.0120505	NA
Inoculum	Leuconostoc	0.00612298	NA
Inoculum	Prevotella_7	0.163301	NA
Inoculum	Streptococcus	0.0242965	NA
M 12	Bifidobacterium	0.19466	0.095917
M 12	Clostridium_sensu_stricto_11	0.0218604	0.0227306
M 12	Clostridium_sensu_stricto_12	0.0383154	0.0133871
M 12	Fructobacillus	0.00106371	0.000740637
M 12	Lactobacillus	0.71703	0.116108
M 12	Leuconostoc	0.0212309	0.0148727
M 12	Prevotella_7	0.00340823	0.00290691
M 15	Bacillus	0.20568	0.0868826
M 15	Bifidobacterium	0.101376	0.0217001
M 15	Caproiciproducens	0.00148673	0.000908414
M 15	Clostridium_sensu_stricto_1	0.00100002	0.0006806
M 15	Clostridium_sensu_stricto_11	0.0152603	0.0137432
M 15	Clostridium_sensu_stricto_12	0.0459646	0.00526055
M 15	Lactobacillus	0.613267	0.118451
M 15	Leuconostoc	0.00884593	0.00865884
M 15	Prevotella_7	0.00503143	0.00236897
M 18	Bacillus	0.00175838	0.00120614
M 18	Bifidobacterium	0.196787	0.0793258
M 18	Caproiciproducens	0.00208401	0.00141339
M 18	Clostridium_sensu_stricto_11	0.00959514	0.00742553
M 18	Clostridium_sensu_stricto_12	0.0352328	0.0133831
M 18	Lactobacillus	0.725779	0.119561
M 18	Leuconostoc	0.00494953	0.00190206
M 18	Prevotella_7	0.0222077	0.019411
M 3	Acinetobacter	0.00138943	0.000658969
M 3	Bifidobacterium	0.121876	0.0303943
M 3	Caproiciproducens	0.00351696	0.00102378
M 3	Clostridium_sensu_stricto_1	0.00612196	0.00513572
M 3	Clostridium_sensu_stricto_11	0.00262687	0.000749401
M 3	Clostridium_sensu_stricto_12	0.0018236	0.000344714
M 3	Dialister	0.00188871	0.0018374
M 3	Fructobacillus	0.260878	0.175999
M 3	Lactobacillus	0.383283	0.156224
M 3	Leuconostoc	0.207261	0.0325296
M 3	Prevotella_7	0.00814105	0.00446438
M 6	Bifidobacterium	0.112493	0.036827
M 6	Clostridium_sensu_stricto_1	0.0115923	0.0170982
M 6	Clostridium_sensu_stricto_12	0.0486269	0.0382538
M 6	Escherichia/Shigella	0.00382069	0.00661763
M 6	Fructobacillus	0.0225985	0.0188597
M 6	Lactobacillus	0.541452	0.0779656
M 6	Leuconostoc	0.257766	0.0974371
M 9	Bifidobacterium	0.137957	0.0914128
M 9	Clostridium_sensu_stricto_1	0.00108542	0.000996936
M 9	Clostridium_sensu_stricto_11	0.00214914	0.00217659
M 9	Clostridium_sensu_stricto_12	0.0532074	0.0280801
M 9	Fructobacillus	0.0053837	0.00229361
M 9	Lactobacillus	0.697775	0.0529722
M 9	Leuconostoc	0.100467	0.0809168
M 9	Prevotella_7	0.00160643	0.000867252
ML 12	Bifidobacterium	0.156865	0.0597575
ML 12	Clostridium_sensu_stricto_12	0.0853794	0.040984
ML 12	Fructobacillus	0.00638229	0.00416344
ML 12	Lactobacillus	0.744774	0.0967683
ML 12	Leuconostoc	0.00364702	0.00194178
ML 15	Bacillus	0.0471596	0.0173479
ML 15	Bifidobacterium	0.223014	0.0231156
ML 15	Caproiciproducens	0.0129309	0.00944489
ML 15	Clostridium_sensu_stricto_11	0.00164931	0.00153675
ML 15	Clostridium_sensu_stricto_12	0.151818	0.0537246
ML 15	Dialister	0.00263337	0.0024483
ML 15	Fontibacillus	0.00103262	0.00036262
ML 15	Fructobacillus	0.00237673	0.0021301
ML 15	Lactobacillus	0.550638	0.0836268
ML 15	Leuconostoc	0.00121108	0.00153312
ML 15	Prevotella_7	0.00439372	0.000413373
ML 18	Bifidobacterium	0.246934	0.062326
ML 18	Caproiciproducens	0.032389	0.0115634
ML 18	Clostridium_sensu_stricto_11	0.00442852	0.00367771
ML 18	Clostridium_sensu_stricto_12	0.134245	0.0310399
ML 18	Dialister	0.0064257	0.00195629
ML 18	Fructobacillus	0.00117226	0.000508645
ML 18	Lactobacillus	0.566808	0.070917
ML 18	Prevotella_7	0.00573103	0.00293931
ML 3	Bifidobacterium	0.200825	0.0781537
ML 3	Caproiciproducens	0.00212743	0.000271139
ML 3	Clostridium_sensu_stricto_1	0.0333008	0.0218837
ML 3	Clostridium_sensu_stricto_11	0.00178009	0.000760416
ML 3	Clostridium_sensu_stricto_12	0.00271356	0.000731997
ML 3	Dialister	0.0035819	0.00211332
ML 3	Escherichia/Shigella	0.00175838	0.00106615
ML 3	Fructobacillus	0.277803	0.120112
ML 3	Lactobacillus	0.346879	0.0442481
ML 3	Leuconostoc	0.117139	0.0316152
ML 3	Prevotella_7	0.0109194	0.00270434
ML 6	Bifidobacterium	0.114425	0.0075523
ML 6	Clostridium_sensu_stricto_1	0.00159557	0.000414455
ML 6	Clostridium_sensu_stricto_12	0.118528	0.137691
ML 6	Escherichia/Shigella	0.00400521	0.00511162
ML 6	Fructobacillus	0.136112	0.12756
ML 6	Lactobacillus	0.498763	0.0507938
ML 6	Leuconostoc	0.124585	0.0627209
ML 6	Prevotella_7	0.00130251	0.000552607
ML 9	Bifidobacterium	0.139347	0.0561474
ML 9	Clostridium_sensu_stricto_12	0.06061	0.0270948
ML 9	Fructobacillus	0.0469554	0.0565945
ML 9	Lactobacillus	0.676978	0.158552
ML 9	Leuconostoc	0.0737653	0.0699217
ML 9	Prevotella_7	0.0010203	0.00129325
MLA 12	Bifidobacterium	0.224521	0.0453234
MLA 12	Caproiciproducens	0.0214498	0.0184283
MLA 12	Clostridium_sensu_stricto_11	0.00801086	0.00580956
MLA 12	Clostridium_sensu_stricto_12	0.197664	0.0276474
MLA 12	Dialister	0.0121357	0.00518899
MLA 12	Fructobacillus	0.0081411	0.00489937
MLA 12	Lactobacillus	0.482164	0.0437954
MLA 12	Leuconostoc	0.00208408	0.00102348
MLA 12	Prevotella_7	0.0279394	0.0143803
MLA 12	Sutterella	0.0146316	0.0170077
MLA 15	Bacillus	0.0270345	0.00989219
MLA 15	Bifidobacterium	0.239969	0.0147183
MLA 15	Caproiciproducens	0.0537057	0.00559573
MLA 15	Clostridium_sensu_stricto_11	0.0115966	0.00216099
MLA 15	Clostridium_sensu_stricto_12	0.201949	0.0420896
MLA 15	Dialister	0.00926641	0.00317623
MLA 15	Fructobacillus	0.0015442	0.00103146
MLA 15	Lactobacillus	0.384398	0.0602456
MLA 15	Prevotella_7	0.0654683	0.027041
MLA 15	Sutterella	0.00317503	0.00188481
MLA 18	Bifidobacterium	0.310676	0.0257368
MLA 18	Caproiciproducens	0.0330191	0.0151288
MLA 18	Clostridium_sensu_stricto_11	0.00809735	0.0070966
MLA 18	Clostridium_sensu_stricto_12	0.090244	0.00997055
MLA 18	Dialister	0.0132643	0.00452225
MLA 18	Gardnerella	0.00191036	0.00177318
MLA 18	Lactobacillus	0.488256	0.0180064
MLA 18	Prevotella_7	0.0455674	0.0184144
MLA 18	Sutterella	0.00718581	0.00627907
MLA 3	Bifidobacterium	0.246825	0.0143625
MLA 3	Caproiciproducens	0.00625204	0.00467317
MLA 3	Clostridium_sensu_stricto_1	0.0665798	0.0120876
MLA 3	Clostridium_sensu_stricto_12	0.00353848	0.000888987
MLA 3	Dialister	0.00623033	0.00102214
MLA 3	Fructobacillus	0.214914	0.0577329
MLA 3	Lactobacillus	0.313036	0.099838
MLA 3	Leuconostoc	0.10546	0.039357
MLA 3	Prevotella_7	0.0350809	0.00430829
MLA 6	Bifidobacterium	0.159861	0.0220105
MLA 6	Clostridium_sensu_stricto_12	0.264952	0.0909906
MLA 6	Dialister	0.00892218	0.00461656
MLA 6	Fructobacillus	0.053164	0.00404634
MLA 6	Lactobacillus	0.383415	0.0513281
MLA 6	Leuconostoc	0.0658852	0.0217642
MLA 6	Prevotella_7	0.0608922	0.0502529
MLA 9	Bifidobacterium	0.156304	0.0197061
MLA 9	Caproiciproducens	0.00629569	0.00553572
MLA 9	Clostridium_sensu_stricto_11	0.0025834	0.00212478
MLA 9	Clostridium_sensu_stricto_12	0.211382	0.14009
MLA 9	Dialister	0.0119616	0.000884422
MLA 9	Fructobacillus	0.0098775	0.00402516
MLA 9	Lactobacillus	0.5201	0.183596
MLA 9	Leuconostoc	0.00716389	0.0032698
MLA 9	Prevotella_7	0.0651929	0.0417201
MLA 9	Sutterella	0.00779355	0.00249328
LA 12	Bifidobacterium	0.00295235	0.000760416
LA 12	Caproiciproducens	0.0406599	0.0144705
LA 12	Clostridium_sensu_stricto_1	0.0885054	0.0233408
LA 12	Clostridium_sensu_stricto_12	0.282101	0.114962
LA 12	Clostridium_sensu_stricto_13	0.0788668	0.0157986
LA 12	Clostridium_sensu_stricto_3	0.0282427	0.0261835
LA 12	Dialister	0.0384891	0.0194998
LA 12	Escherichia/Shigella	0.0387279	0.033689
LA 12	Lachnoclostridium_5	0.108868	0.0253667
LA 12	Lactobacillus	0.0077065	0.00646066
LA 12	Lactococcus	0.0253989	0.0338959
LA 12	Paraclostridium	0.122523	0.0602691
LA 12	Sutterella	0.0383154	0.0275456
LA 12	Terrisporobacter	0.0971453	0.0277021
LA 15	Atopobium	0.00130401	0.000390981
LA 15	Bifidobacterium	0.0019127	0.000620086
LA 15	Caproiciproducens	0.0498591	0.00576611
LA 15	Clostridium_sensu_stricto_1	0.0785915	0.0311073
LA 15	Clostridium_sensu_stricto_12	0.298186	0.0804831
LA 15	Clostridium_sensu_stricto_13	0.0613117	0.0208482
LA 15	Clostridium_sensu_stricto_3	0.0143243	0.0122379
LA 15	Dialister	0.0287981	0.00473804
LA 15	Escherichia/Shigella	0.056407	0.0507675
LA 15	Lachnoclostridium_5	0.0802253	0.0261192
LA 15	Lactobacillus	0.0052596	0.00334591
LA 15	Lactococcus	0.0209734	0.0202821
LA 15	Paraclostridium	0.109564	0.0064191
LA 15	Staphylococcus	0.0383178	0.000383672
LA 15	Stenotrophomonas	0.0370378	0.0171194
LA 15	Sutterella	0.0424224	0.0332008
LA 15	Terrisporobacter	0.0742232	0.0376253
LA 18	Bifidobacterium	0.00225819	0.000327588
LA 18	Caproiciproducens	0.0309187	0.00953615
LA 18	Clostridium_sensu_stricto_1	0.0599074	0.0138386
LA 18	Clostridium_sensu_stricto_12	0.342061	0.0663213
LA 18	Clostridium_sensu_stricto_13	0.0634258	0.0106466
LA 18	Clostridium_sensu_stricto_3	0.0143512	0.010296
LA 18	Dialister	0.036152	0.00780525
LA 18	Escherichia/Shigella	0.0584017	0.0471457
LA 18	Lachnoclostridium_5	0.073825	0.0185071
LA 18	Lactobacillus	0.00486446	0.0037451
LA 18	Lactococcus	0.0367459	0.0455003
LA 18	Paraclostridium	0.128612	0.0316667
LA 18	Staphylococcus	0.00275783	0.00144618
LA 18	Sutterella	0.0369193	0.0361662
LA 18	Terrisporobacter	0.107236	0.0441632
LA 3	Bifidobacterium	0.0348467	0.00377725
LA 3	Caproiciproducens	0.0414252	0.0035366
LA 3	Clostridium_sensu_stricto_1	0.419354	0.00578291
LA 3	Clostridium_sensu_stricto_12	0.00531909	0.00341196
LA 3	Clostridium_sensu_stricto_13	0.0679351	0.0150804
LA 3	Clostridium_sensu_stricto_9	0.0132206	0.0211193
LA 3	Dialister	0.0556898	0.0061858
LA 3	Fructobacillus	0.00983532	0.00207195
LA 3	Gardnerella	0.00141121	0.000263048
LA 3	Lachnoclostridium_5	0.0010421	0.000426968
LA 3	Lactobacillus	0.0923997	0.0467369
LA 3	Leuconostoc	0.015893	0.00433385
LA 3	Paraclostridium	0.0903467	0.0782941
LA 3	Prevotella_7	0.0268996	0.00944106
LA 3	Sutterella	0.105408	0.0374168
LA 3	Terrisporobacter	0.0176716	0.0168761
LA 6	Atopobium	0.00136764	0.00126785
LA 6	Bifidobacterium	0.00981232	0.00500406
LA 6	Caproiciproducens	0.0793459	0.0136562
LA 6	Clostridium_sensu_stricto_1	0.219	0.007579
LA 6	Clostridium_sensu_stricto_12	0.0568569	0.0486433
LA 6	Clostridium_sensu_stricto_13	0.138958	0.035389
LA 6	Clostridium_sensu_stricto_3	0.0100733	0.0133423
LA 6	Clostridium_sensu_stricto_9	0.00440682	0.00763283
LA 6	Dialister	0.0623041	0.0207324
LA 6	Fructobacillus	0.00169327	0.00163851
LA 6	Lachnoclostridium_5	0.08219	0.00747975
LA 6	Lactobacillus	0.0312168	0.0244116
LA 6	Lactococcus	0.00115055	0.0016659
LA 6	Leuconostoc	0.00106372	0.000960085
LA 6	Paraclostridium	0.10377	0.0900178
LA 6	Prevotella_7	0.00870512	0.00784759
LA 6	Sutterella	0.13123	0.0573571
LA 6	Terrisporobacter	0.0552064	0.0258075
LA 9	Bifidobacterium	0.0054274	0.00132921
LA 9	Caproiciproducens	0.0597012	0.013972
LA 9	Clostridium_sensu_stricto_1	0.1402	0.0296324
LA 9	Clostridium_sensu_stricto_12	0.283822	0.126222
LA 9	Clostridium_sensu_stricto_13	0.07175	0.0150435
LA 9	Clostridium_sensu_stricto_3	0.0142852	0.0125149
LA 9	Dialister	0.0457641	0.0149074
LA 9	Escherichia/Shigella	0.00547064	0.00743564
LA 9	Lachnoclostridium_5	0.077459	0.0294326
LA 9	Lactobacillus	0.0211241	0.0196199
LA 9	Lactococcus	0.0351703	0.031446
LA 9	Paraclostridium	0.0878324	0.0916851
LA 9	Prevotella_7	0.00284389	0.00302975
LA 9	Sutterella	0.0654129	0.0495833
LA 9	Terrisporobacter	0.0809363	0.0811945
SLA 12	Bifidobacterium	0.213615	0.0790732
SLA 12	Caproiciproducens	0.0789561	0.0521077
SLA 12	Clostridium_sensu_stricto_11	0.0120269	0.00878049
SLA 12	Clostridium_sensu_stricto_12	0.176321	0.0862652
SLA 12	Dialister	0.0352769	0.00369149
SLA 12	Fructobacillus	0.050929	0.0183131
SLA 12	Gardnerella	0.00230116	0.00104678
SLA 12	Lactobacillus	0.224015	0.0414957
SLA 12	Prevotella_7	0.192123	0.0329791
SLA 12	Sutterella	0.0115709	0.00162875
SLA 15	Bifidobacterium	0.307891	0.193912
SLA 15	Caproiciproducens	0.02338	0.0208596
SLA 15	Clostridium_sensu_stricto_1	0.00106371	0.00091253
SLA 15	Clostridium_sensu_stricto_11	0.00149788	0.000362603
SLA 15	Clostridium_sensu_stricto_12	0.135461	0.0927563
SLA 15	Dialister	0.0170628	0.0155448
SLA 15	Fructobacillus	0.0118528	0.00310218
SLA 15	Gardnerella	0.00353848	0.00310036
SLA 15	Lactobacillus	0.33227	0.096395
SLA 15	Prevotella_7	0.159145	0.145147
SLA 15	Sutterella	0.00612178	0.00592748
SLA 18	Atopobium	0.00106383	0.000966739
SLA 18	Bifidobacterium	0.28817	0.0643014
SLA 18	Caproiciproducens	0.0498032	0.0158336
SLA 18	Clostridium_sensu_stricto_1	0.00558037	0.00813751
SLA 18	Clostridium_sensu_stricto_11	0.00234489	0.00143771
SLA 18	Clostridium_sensu_stricto_12	0.11569	0.081893
SLA 18	Dialister	0.0228399	0.018869
SLA 18	Fructobacillus	0.0204542	0.0294577
SLA 18	Gardnerella	0.0124627	0.010442
SLA 18	Lactobacillus	0.317541	0.144717
SLA 18	Prevotella_7	0.146941	0.124365
SLA 18	Solobacterium	0.00106373	0.00156073
SLA 18	Sutterella	0.0153278	0.0139496
SLA 3	Bacillus	0.0643408	0.0234471
SLA 3	Bifidobacterium	0.0398233	0.0338867
SLA 3	Clostridium_sensu_stricto_1	0.51134	0.0749149
SLA 3	Clostridium_sensu_stricto_12	0.00258377	0.00210038
SLA 3	Fructobacillus	0.28857	0.0323512
SLA 3	Lactobacillus	0.0652443	0.0581014
SLA 3	Leuconostoc	0.0261861	0.0126239
SLA 6	Bacillus	0.0049496	0.00153138
SLA 6	Bifidobacterium	0.17708	0.0259752
SLA 6	Caproiciproducens	0.00232285	0.000819467
SLA 6	Clostridium_sensu_stricto_1	0.00633895	0.00630782
SLA 6	Clostridium_sensu_stricto_11	0.00564426	0.00255754
SLA 6	Clostridium_sensu_stricto_12	0.29038	0.0707407
SLA 6	Dialister	0.0113756	0.00369058
SLA 6	Fructobacillus	0.231635	0.0252879
SLA 6	Lactobacillus	0.263739	0.118522
SLA 6	Leuconostoc	0.00280044	0.000621214
SLA 6	Sutterella	0.00290912	0.00503875
SLA 9	Bifidobacterium	0.251297	0.0217846
SLA 9	Caproiciproducens	0.0342342	0.024335
SLA 9	Clostridium_sensu_stricto_11	0.00801042	0.00190206
SLA 9	Clostridium_sensu_stricto_12	0.294649	0.120265
SLA 9	Dialister	0.0145881	0.0153222
SLA 9	Fructobacillus	0.180202	0.0465925
SLA 9	Lactobacillus	0.146684	0.0436153
SLA 9	Leuconostoc	0.00132422	0.000497403
SLA 9	Prevotella_7	0.0616086	0.106427
SLA 9	Sutterella	0.00471073	0.0081029
