# Supplementary material for: Dynamics of dark fermentation microbial communities in the light of lactate and butyrate production
Source: Microbiome. 2021 Jul 14;9:158. doi: 10.1186/s40168-021-01105-x (PMC8281708; doi:10.1186/s40168-021-01105-x)
Supplement: Supplementary file 8 — Additional file 7. Detailed calculations for Figure 6 based on taxonomic assignments in Additional File 6. [file 40168_2021_1105_MOESM8_ESM.xlsx]

## Sheet: Likely La producers from Sucros
	LA-3-BC	MLA-3-AC	Fold change					Species	D (%)	Fold change	LA-3-BC (%)	MLA-3-AC (%)
Lactobacillus similis	0.005708	0.704362	123.399					Lactobacillus similis	0.698654	123.399	0.005708	0.704362
Lactobacillus odoratitofui	0.00066	0.028301	42.8803					Lactobacillus odoratitofui	0.027641	42.8803	0.00066	0.028301
Weissella hellenica	0.010713	0.26454	24.6934					Weissella hellenica	0.253827	24.6934	0.010713	0.26454
Leuconostoc fallax	0.415677	9.27294	22.308					Leuconostoc fallax	8.85726	22.308	0.415677	9.27294
Leuconostocaceae bacterium R-53105	0.002697	0.059709	22.139					Leuconostocaceae bacterium R-53105	0.057012	22.139	0.002697	0.059709
Lactobacillus hokkaidonensis	0.002232	0.048385	21.6779					Lactobacillus hokkaidonensis	0.046153	21.6779	0.002232	0.048385
Leuconostoc carnosum	0.010367	0.173361	16.7224					Leuconostoc carnosum	0.162994	16.7224	0.010367	0.173361
Lactobacillus pantheris	0.057323	0.830244	14.4836					Lactobacillus pantheris	0.772921	14.4836	0.057323	0.830244
Leuconostoc lactis	0.00403	0.055189	13.6945					Leuconostoc lactis	0.051159	13.6945	0.00403	0.055189
Leuconostoc citreum	0.019288	0.250714	12.9984					Leuconostoc citreum	0.231426	12.9984	0.019288	0.250714
Leuconostoc gelidum	0.029315	0.326953	11.1531					Leuconostoc gelidum	0.297638	11.1531	0.029315	0.326953
Leuconostoc pseudomesenteroides	0.00508	0.054709	10.7695					Leuconostoc pseudomesenteroides	0.049629	10.7695	0.00508	0.054709
Lactobacillus hammesii	0.002012	0.020388	10.1332					Lactobacillus hammesii	0.018376	10.1332	0.002012	0.020388
Bifidobacterium subtile	0.719003	7.15293	9.9484					Bifidobacterium subtile	6.43393	9.9484	0.719003	7.15293
Lactobacillus composti	0.002376	0.023482	9.883					Lactobacillus composti	0.021106	9.883	0.002376	0.023482
Bifidobacterium psychraerophilum	0.251397	2.30044	9.15064					Bifidobacterium psychraerophilum	2.04905	9.15064	0.251397	2.30044
Lactobacillus hilgardii	0.004181	0.036856	8.81512					Lactobacillus hilgardii	0.032675	8.81512	0.004181	0.036856
Bifidobacterium crudilactis	1.55798	12.0434	7.73014					Bifidobacterium crudilactis	10.4854	7.73014	1.55798	12.0434
Lactobacillus mali	0.032195	0.248716	7.7253					Lactobacillus mali	0.216521	7.7253	0.032195	0.248716
Bifidobacterium asteroides	0.019219	0.148249	7.71367					Bifidobacterium asteroides	0.12903	7.71367	0.019219	0.148249
Bifidobacterium actinocoloniiforme	0.003885	0.029873	7.68932					Bifidobacterium actinocoloniiforme	0.025988	7.68932	0.003885	0.029873
Bifidobacterium bifidum	0.004508	0.032487	7.20652					Bifidobacterium bifidum	0.027979	7.20652	0.004508	0.032487
Lactobacillus uvarum	1.82187	13.1028	7.19196					Lactobacillus uvarum	11.2809	7.19196	1.82187	13.1028
Lactobacillus brevis	0.277902	1.98647	7.1481					Lactobacillus brevis	1.70857	7.1481	0.277902	1.98647
Lactobacillus sucicola	0.118085	0.84189	7.12953					Lactobacillus sucicola	0.723805	7.12953	0.118085	0.84189
Bifidobacterium bombi	0.008726	0.0621	7.11666					Bifidobacterium bombi	0.053374	7.11666	0.008726	0.0621
Bifidobacterium breve	0.007563	0.053076	7.01785					Bifidobacterium breve	0.045513	7.01785	0.007563	0.053076
Lactobacillus aquaticus	0.145074	1.01234	6.97811					Lactobacillus aquaticus	0.867268	6.97811	0.145074	1.01234
Peptoa0erobacter stomatis	0.006752	0.046644	6.90818					Peptoa0erobacter stomatis	0.039892	6.90818	0.006752	0.046644
Lactobacillus capillatus	0.032289	0.219862	6.80919					Lactobacillus capillatus	0.187573	6.80919	0.032289	0.219862
Bifidobacterium longum	0.016754	0.11237	6.70706					Bifidobacterium longum	0.095616	6.70706	0.016754	0.11237
Oenococcus oeni	0.007947	0.053098	6.68152					Oenococcus oeni	0.045151	6.68152	0.007947	0.053098
Bifidobacterium adolescentis	0.012234	0.080935	6.61558					Bifidobacterium adolescentis	0.068701	6.61558	0.012234	0.080935
Pediococcus damnosus	0.003722	0.023257	6.24852					Pediococcus damnosus	0.019535	6.24852	0.003722	0.023257
Bifidobacterium lemurum	0.005633	0.034605	6.14326					Bifidobacterium lemurum	0.028972	6.14326	0.005633	0.034605
Lactobacillus ruminis	0.004853	0.028284	5.82815					Lactobacillus ruminis	0.023431	5.82815	0.004853	0.028284
Bifidobacterium callitrichos	0.004338	0.024732	5.70124					Bifidobacterium callitrichos	0.020394	5.70124	0.004338	0.024732
Lactobacillus gasseri	0.006538	0.037222	5.69318					Lactobacillus gasseri	0.030684	5.69318	0.006538	0.037222
Bifidobacterium thermacidophilum	0.003615	0.020063	5.54993					Bifidobacterium thermacidophilum	0.016448	5.54993	0.003615	0.020063
Bifidobacterium animalis	0.004904	0.026896	5.4845					Bifidobacterium animalis	0.021992	5.4845	0.004904	0.026896
Bifidobacterium biavatii	0.008575	0.046718	5.44816					Bifidobacterium biavatii	0.038143	5.44816	0.008575	0.046718
Lactobacillus oeni	0.010556	0.057271	5.42545					Lactobacillus oeni	0.046715	5.42545	0.010556	0.057271
Bifidobacterium bohemicum	0.0043	0.023151	5.38395					Bifidobacterium bohemicum	0.018851	5.38395	0.0043	0.023151
Bifidobacterium minimum	0.029749	0.151812	5.1031					Bifidobacterium minimum	0.122063	5.1031	0.029749	0.151812
Lactobacillus buchneri	0.010486	0.052409	4.998					Lactobacillus buchneri	0.041923	4.998	0.010486	0.052409
Lactobacillus farraginis	0.004665	0.023249	4.98371					Lactobacillus farraginis	0.018584	4.98371	0.004665	0.023249
Lactobacillus parafarraginis	0.007921	0.039394	4.97336					Lactobacillus parafarraginis	0.031473	4.97336	0.007921	0.039394
Lactobacillus wasatchensis	0.008487	0.042157	4.96724					Lactobacillus wasatchensis	0.03367	4.96724	0.008487	0.042157
Lactobacillus satsumensis	0.027876	0.137954	4.94884					Lactobacillus satsumensis	0.110078	4.94884	0.027876	0.137954
Lactobacillus acidipiscis	0.005545	0.027354	4.93309					Lactobacillus acidipiscis	0.021809	4.93309	0.005545	0.027354
Lactobacillus crispatus	0.006934	0.034171	4.92804					Lactobacillus crispatus	0.027237	4.92804	0.006934	0.034171
Leuconostoc mesenteroides	1.50539	7.349	4.88178					Leuconostoc mesenteroides	5.84361	4.88178	1.50539	7.349
Lactobacillus parabuchneri	0.018238	0.08578	4.70337					Lactobacillus parabuchneri	0.067542	4.70337	0.018238	0.08578
Enterococcus faecium	0.009254	0.04105	4.43592					Enterococcus faecium	0.031796	4.43592	0.009254	0.04105
Bifidobacterium scardovii	0.008858	0.039228	4.42854					Bifidobacterium scardovii	0.03037	4.42854	0.008858	0.039228
Lactobacillus vini	0.021853	0.091187	4.17275					Lactobacillus vini	0.069334	4.17275	0.021853	0.091187
Gardnerella vagi0lis	0.005576	0.023263	4.17199					Gardnerella vagi0lis	0.017687	4.17199	0.005576	0.023263
Bifidobacterium mongoliense	0.208414	0.865613	4.15333					Bifidobacterium mongoliense	0.657199	4.15333	0.208414	0.865613
Lactobacillus 0gelii	0.472874	1.94849	4.12052					Lactobacillus 0gelii	1.47561	4.12052	0.472874	1.94849
Lactobacillus hordei	0.034779	0.141387	4.0653					Lactobacillus hordei	0.106608	4.0653	0.034779	0.141387
Mycobacterium abscessus	0.007714	0.031283	4.05535					Mycobacterium abscessus	0.023569	4.05535	0.007714	0.031283
Lactobacillus sakei	0.005734	0.023027	4.01587					Lactobacillus sakei	0.017293	4.01587	0.005734	0.023027
Lactobacillus fermentum	0.008349	0.033301	3.98862					Lactobacillus fermentum	0.024952	3.98862	0.008349	0.033301
Lactococcus lactis	0.009361	0.036956	3.94787					Lactococcus lactis	0.027595	3.94787	0.009361	0.036956
Enterococcus faecalis	0.009399	0.036894	3.92531					Enterococcus faecalis	0.027495	3.92531	0.009399	0.036894
Lactobacillus ghanensis	0.032031	0.117899	3.68078					Lactobacillus ghanensis	0.085868	3.68078	0.032031	0.117899
Bifidobacterium tsurumiense	0.006519	0.023458	3.5984					Bifidobacterium tsurumiense	0.016939	3.5984	0.006519	0.023458
Lactobacillus salivarius	0.011983	0.042667	3.56063					Lactobacillus salivarius	0.030684	3.56063	0.011983	0.042667
Staphylococcus aureus	0.014082	0.043526	3.0909					Staphylococcus aureus	0.029444	3.0909	0.014082	0.043526
Lactobacillus diolivorans	0.077799	0.225366	2.89677					Lactobacillus diolivorans	0.147567	2.89677	0.077799	0.225366
Lactobacillus reuteri	0.010813	0.030703	2.83945					Lactobacillus reuteri	0.01989	2.83945	0.010813	0.030703
Lactobacillus rhamnosus	0.036992	0.090309	2.44131					Lactobacillus rhamnosus	0.053317	2.44131	0.036992	0.090309

## Sheet: LA18 vs LA3
	D (%)	Fold change	LA-3-BC	LA-18-AB
Shigella sonnei	0.505179	10104.6	5e-05	0.505229
Shigella flexneri	0.033225	2556.77	1.3e-05	0.033238
Escherichia coli	1.43778	773.584	0.001861	1.43964
[Clostridium] indolis	0.711756	398.185	0.001792	0.713548
[Clostridium] methoxybenzovorans	0.389959	381.448	0.001025	0.390984
[Clostridium] celerecrescens	2.66808	110.888	0.02428	2.69236
Clostridium tyrobutyricum	28.5854	105.75	0.272891	28.8583
Clostridium sp. ASBs410	0.095275	99.4246	0.000968	0.096243
Clostridium sp. C105KSO15	0.624362	98.0863	0.006431	0.630793
[Desulfotomaculum] guttoideum	0.106586	66.7127	0.001622	0.108208
Lactococcus lactis	0.530654	57.6877	0.009361	0.540015
Salmonella enterica	0.043663	45.8285	0.000974	0.044637
[Clostridium] sphenoides	0.068846	39.2903	0.001798	0.070644
Clostridium autoethanogenum	0.036206	31.9718	0.001169	0.037375
Clostridium intesti0le	1.51309	31.2588	0.050005	1.5631
Clostridium coskatii	0.108783	30.6331	0.003671	0.112454
Klebsiella pneumoniae	0.030246	30.3366	0.001031	0.031277
Clostridium sp. 12(A)	0.053464	28.1667	0.001968	0.055432
Clostridium kluyveri	0.332346	25.0291	0.013831	0.346177
[Clostridium] saccharolyticum	0.042464	16.71	0.002703	0.045167
Clostridium ljungdahlii	0.131081	11.0338	0.013064	0.144145
Clostridium ragsdalei	0.049721	10.2076	0.0054	0.055121
Clostridium arbusti	0.057962	9.26847	0.00701	0.064972
Clostridium homopropionicum	0.039352	9.1711	0.004816	0.044168
Clostridium scatologenes	0.030197	8.95286	0.003797	0.033994
Clostridium tetani	0.020785	7.90302	0.003011	0.023796
Terrisporobacter glycolicus	4.11593	7.22557	0.661133	4.77706
Hungatella hathewayi	0.025748	6.80171	0.004438	0.030186
Gottschalkia acidurici	0.027063	6.37391	0.005036	0.032099
Clostridium sp. Marseille-P2415	0.030239	5.90813	0.006161	0.0364
Clostridium acidisoli	0.048184	5.63397	0.010398	0.058582
A0erocolum0 jejuensis	0.023977	5.15474	0.005771	0.029748
Terrisporobacter othiniensis	0.027737	4.69827	0.0075	0.035237
Clostridium tetanomorphum	0.026657	4.36239	0.007928	0.034585
Clostridium akagii	0.017453	3.52832	0.006903	0.024356
Romboutsia timonensis	0.036789	3.30479	0.015962	0.052751
Clostridium estertheticum	0.017568	3.06391	0.008512	0.02608
Peptostreptococcaceae bacterium VA2	0.019865	2.93258	0.010279	0.030144
Clostridium sp. DMHC 10	0.025791	2.83631	0.014045	0.039836
Clostridium pasteurianum	0.201597	2.83584	0.109812	0.311409
Clostridium carboxidivorans	0.030913	2.83406	0.016855	0.047768
Clostridium acetobutylicum	0.020575	2.54664	0.013303	0.033878
Clostridium sp. KNHs214	0.038975	2.54522	0.025223	0.064198
Clostridium hydrogeniformans	0.023178	2.54191	0.015032	0.03821
Clostridium oryzae	0.012729	2.38781	0.009172	0.021901
Clostridium sp. HMP27	0.021936	2.35558	0.016182	0.038118
[Clostridium] dakarense	0.012448	2.11491	0.011165	0.023613
Clostridium cavendishii	0.015811	2.09064	0.014497	0.030308

## Sheet: MLA9 vs MLA3
	D (%)	Fold change	MLA-3-AC	MLA-9-AC
Clostridium ragsdalei	0.056281	74.3781	0.000767	0.057048
Dakarella massiliensis	0.028235	65.3166	0.000439	0.028674
Clostridium tyrobutyricum	11.2875	64.4246	0.177968	11.4655
Clostridium kluyveri	0.17714	63.6379	0.002828	0.179968
Clostridium ljungdahlii	0.079133	45.8346	0.001765	0.080898
Clostridium coskatii	0.035821	38.3135	0.00096	0.036781
Clostridium arbusti	0.041697	37.1953	0.001152	0.042849
Clostridium sp. DMHC 10	0.057794	28.2228	0.002123	0.059917
Clostridium estertheticum	0.025791	16.8227	0.00163	0.027421
Clostridium magnum	0.042595	16.5399	0.002741	0.045336
Clostridium carboxidivorans	0.021906	8.99197	0.002741	0.024647
Lactobacillus vaccinostercus	0.097384	8.61884	0.012782	0.110166
Clostridium acetobutylicum	0.018936	7.72682	0.002815	0.021751
Clostridium botulinum	0.140829	7.40074	0.022002	0.162831
Lactobacillus kimchicus	0.069133	6.58876	0.01237	0.081503
Clostridium saccharobutylicum	0.019002	4.82103	0.004973	0.023975
Lactobacillus parabuchneri	0.300353	4.50143	0.08578	0.386133
Lactobacillus 0murensis	0.027184	3.95639	0.009195	0.036379
Lactobacillus parafarraginis	0.112049	3.84432	0.039394	0.151443
Lactobacillus buchneri	0.132969	3.53714	0.052409	0.185378
Clostridium pasteurianum	0.116775	3.52138	0.046314	0.163089
Lactobacillus hammesii	0.051226	3.51256	0.020388	0.071614
Viruses	0.027846	3.51204	0.011085	0.038931
Prevotella multisaccharivorax	0.056396	3.2254	0.025342	0.081738
Prevotella saccharolytica	0.014503	3.21183	0.006557	0.02106
Lactobacillus composti	0.050356	3.14445	0.023482	0.073838
Prevotella bryantii	0.056679	3.03435	0.027861	0.08454
Prevotella sp. CAG:924	0.030821	3.0265	0.015209	0.04603
Prevotella buccae	0.015158	3.00291	0.007568	0.022726
Prevotella sp. CAG:732	0.021429	3.00215	0.010703	0.032132
Prevotella paludivivens	0.06108	2.97058	0.030996	0.092076
Prevotella sp. CAG:604	0.014893	2.95677	0.007611	0.022504
Prevotella sp. KH2C16	0.026122	2.94969	0.013398	0.03952
Prevotella sp. AGR2160	0.084555	2.94773	0.043412	0.127967
Prevotella sp. CAG:1092	0.015186	2.93576	0.007845	0.023031
Bacteroidales bacterium KA00344	0.014255	2.93	0.007386	0.021641
Prevotella sp. CAG:474	0.014029	2.9147	0.007327	0.021356
Prevotella albensis	0.057494	2.91468	0.030028	0.087522
Prevotella sp. CAG:386	0.021175	2.88675	0.011223	0.032398
Prevotella oryzae	0.041366	2.87925	0.022012	0.063378
Prevotella sp. CAG:1320	0.023105	2.87525	0.012321	0.035426
Prevotella baroniae	0.023143	2.86758	0.012392	0.035535
Prevotella bergensis	0.013651	2.84748	0.007389	0.02104
Prevotella salivae	0.014351	2.79905	0.007977	0.022328
Prevotella sp. kh1p2	0.039479	2.78291	0.022143	0.061622
Prevotella maculosa	0.017931	2.74902	0.010252	0.028183
Lactobacillus hilgardii	0.060407	2.639	0.036856	0.097263
Clostridium beijerinckii	0.01847	2.30743	0.014127	0.032597
Lactobacillus farraginis	0.029732	2.27885	0.023249	0.052981
Lactobacillus brevis	2.40442	2.2104	1.98647	4.3909
Bacillus cereus	0.011132	2.06997	0.010404	0.021536
Lactobacillus diolivorans	0.232314	2.03083	0.225366	0.45768

## Sheet: common increasers in MLA and LA
Species	D (%)	Fold change	LA-3-BC	LA-18-AB		Species	D (%)	Fold change	MLA-3-AC	MLA-9-AC				Species	Delta in LA	Delta in MLA	Fold in LA	Fold in MLA
Clostridium tyrobutyricum	28.5854	105.75	0.272891	28.8583		Clostridium tyrobutyricum	11.2875	64.4246	0.177968	11.4655				Clostridium_tyrobutyricum	28.5854	11.2875	105.75	64.4246
Clostridium coskatii	0.108783	30.6331	0.003671	0.112454		Clostridium coskatii	0.035821	38.3135	0.00096	0.036781				Clostridium_coskatii	0.108783	0.035821	30.6331	38.3135
Clostridium kluyveri	0.332346	25.0291	0.013831	0.346177		Clostridium kluyveri	0.17714	63.6379	0.002828	0.179968				Clostridium_kluyveri	0.332346	0.17714	25.0291	63.6379
Clostridium ljungdahlii	0.131081	11.0338	0.013064	0.144145		Clostridium ljungdahlii	0.079133	45.8346	0.001765	0.080898				Clostridium_ljungdahlii	0.131081	0.079133	11.0338	45.8346
Clostridium ragsdalei	0.049721	10.2076	0.0054	0.055121		Clostridium ragsdalei	0.056281	74.3781	0.000767	0.057048				Clostridium_ragsdalei	0.049721	0.056281	10.2076	74.3781
Clostridium arbusti	0.057962	9.26847	0.00701	0.064972		Clostridium arbusti	0.041697	37.1953	0.001152	0.042849				Clostridium_arbusti	0.057962	0.041697	9.26847	37.1953
Clostridium estertheticum	0.017568	3.06391	0.008512	0.02608		Clostridium estertheticum	0.025791	16.8227	0.00163	0.027421				Clostridium_estertheticum	0.017568	0.025791	3.06391	16.8227
Clostridium sp. DMHC 10	0.025791	2.83631	0.014045	0.039836		Clostridium sp. DMHC 10	0.057794	28.2228	0.002123	0.059917				Clostridium_sp.DMHC 10	0.025791	0.057794	2.83631	28.2228
Clostridium pasteurianum	0.201597	2.83584	0.109812	0.311409		Clostridium pasteurianum	0.116775	3.52138	0.046314	0.163089				Clostridium_pasteurianum	0.201597	0.116775	2.83584	3.52138
Clostridium carboxidivorans	0.030913	2.83406	0.016855	0.047768		Clostridium carboxidivorans	0.021906	8.99197	0.002741	0.024647				Clostridium_carboxidivorans	0.030913	0.021906	2.83406	8.99197
Clostridium acetobutylicum	0.020575	2.54664	0.013303	0.033878		Clostridium acetobutylicum	0.018936	7.72682	0.002815	0.021751				Clostridium_acetobutylicum	0.020575	0.018936	2.54664	7.72682
