# Supplementary material for: Dynamics of dark fermentation microbial communities in the light of lactate and butyrate production
Source: Microbiome. 2021 Jul 14;9:158. doi: 10.1186/s40168-021-01105-x (PMC8281708; doi:10.1186/s40168-021-01105-x)
Supplement: Supplementary file 9 — Additional file 8. Detailed data describing metabolic potential based on KEGG analysis of the MLA3, MLA9, LA3 and LA18 MCs - the relative abundance of predicted functional genes related to acid fermentation routes. [file 40168_2021_1105_MOESM9_ESM.xlsx]

## Sheet: Sheet1
	AS007_MLA_3	AS012_LA_3	AS077_LA_18	AS091_MLA_9
K00003	0.229166	0.161042	0.208553	0.21993	hom; homoserine dehydrogenase [EC:1.1.1.3]
K00004	0.1223	0.0861974	0.0701519	0.0911093	BDH, butB; (R,R)-butanediol dehydrogenase / meso-butanediol dehydrogenase / diacetyl reductase [EC:1.1.1.4 1.1.1.- 1.1.1.303]
K00005	0.0972333	0.145012	0.210375	0.121629	gldA; glycerol dehydrogenase [EC:1.1.1.6]
K00008	0.0124944	0.0655608	0.0647043	0.0278016	SORD, gutB; L-iditol 2-dehydrogenase [EC:1.1.1.14]
K00009	0.0686262	0.0599017	0.0934981	0.0971738	mtlD; mannitol-1-phosphate 5-dehydrogenase [EC:1.1.1.17]
K00010	0.0228194	0.032114	0.0945255	0.0244153	iolG; myo-inositol 2-dehydrogenase / D-chiro-inositol 1-dehydrogenase [EC:1.1.1.18 1.1.1.369]
K00012	0.178266	0.141269	0.0381134	0.134196	UGDH, ugd; UDPglucose 6-dehydrogenase [EC:1.1.1.22]
K00013	0.22291	0.124658	0.111529	0.179696	hisD; histidinol dehydrogenase [EC:1.1.1.23]
K00014	0.190976	0.150859	0.122775	0.181389	aroE; shikimate dehydrogenase [EC:1.1.1.25]
K00015	0.00666136	0.000934675	0	0.00468603	gyaR, GOR1; glyoxylate reductase [EC:1.1.1.26]
K00016	0.371489	0.274219	0.161415	0.375829	LDH, ldh; L-lactate dehydrogenase [EC:1.1.1.27]
K00018	0.213932	0.10014	0.12994	0.371093	hprA; glycerate dehydrogenase [EC:1.1.1.29]
K00020	0.129513	0.0608088	0.0566901	0.125275	mmsB, HIBADH; 3-hydroxyisobutyrate dehydrogenase [EC:1.1.1.31]
K00022	0.000205419	0	0	0.0074051	HADH; 3-hydroxyacyl-CoA dehydrogenase [EC:1.1.1.35]
K00024	0.00228202	0.0101141	0.00979828	0.00809969	mdh; malate dehydrogenase [EC:1.1.1.37]
K00027	0.0207566	0.195843	0.103133	0.015788	ME2, sfcA, maeA; malate dehydrogenase (oxaloacetate-decarboxylating) [EC:1.1.1.38]
K00029	0.00358994	0.0299108	0.0239445	0.015104	E1.1.1.40, maeB; malate dehydrogenase (oxaloacetate-decarboxylating)(NADP+) [EC:1.1.1.40]
K00030	0.00168584	0.00156068	0.0624299	0.0233338	IDH3; isocitrate dehydrogenase (NAD+) [EC:1.1.1.41]
K00031	0.139619	0.0831485	0.038028	0.138854	IDH1, IDH2, icd; isocitrate dehydrogenase [EC:1.1.1.42]
K00033	0.361973	0.0899551	0.0516583	0.27186	PGD, gnd, gntZ; 6-phosphogluconate dehydrogenase [EC:1.1.1.44 1.1.1.343]
K00034	0.00782983	0.0035911	0	0.018377	gdh; glucose 1-dehydrogenase [EC:1.1.1.47]
K00036	0.2532	0.0439859	0.0140558	0.175628	G6PD, zwf; glucose-6-phosphate 1-dehydrogenase [EC:1.1.1.49 1.1.1.363]
K00038	0.0106448	0.00195911	0	0.0256941	E1.1.1.53; 3alpha(or 20beta)-hydroxysteroid dehydrogenase [EC:1.1.1.53]
K00040	0.0217301	0.0465381	0.045728	0.0353853	uxuB; fructuronate reductase [EC:1.1.1.57]
K00041	0.0115424	0.0758345	0.0556247	0.0143691	uxaB; tagaturonate reductase [EC:1.1.1.58]
K00046	0.00340503	0.0649202	0.0393345	0.00586474	idnO; gluconate 5-dehydrogenase [EC:1.1.1.69]
K00048	0.000825575	0.0199501	0.0343723	0.00140314	fucO; lactaldehyde reductase [EC:1.1.1.77]
K00052	0.155981	0.110681	0.126607	0.141987	leuB, IMDH; 3-isopropylmalate dehydrogenase [EC:1.1.1.85]
K00053	0.139883	0.10828	0.116428	0.147195	ilvC; ketol-acid reductoisomerase [EC:1.1.1.86]
K00054	0.166246	0.030916	0.00130753	0.143227	mvaA; hydroxymethylglutaryl-CoA reductase [EC:1.1.1.88]
K00055	0.033406	0.00850528	0	0.0512928	E1.1.1.90; aryl-alcohol dehydrogenase [EC:1.1.1.90]
K00057	0.162653	0.132543	0.167128	0.168492	gpsA; glycerol-3-phosphate dehydrogenase (NAD(P)+) [EC:1.1.1.94]
K00058	0.546073	0.245536	0.267664	0.475405	serA, PHGDH; D-3-phosphoglycerate dehydrogenase / 2-oxoglutarate reductase [EC:1.1.1.95 1.1.1.399]
K00059	0.199136	0.204315	0.204916	0.187312	fabG, OAR1; 3-oxoacyl-[acyl-carrier protein] reductase [EC:1.1.1.100]
K00060	0.000357588	0	0.0239329	0	tdh; threonine 3-dehydrogenase [EC:1.1.1.103]
K00065	0.0250225	0.0389136	0.0451271	0.0364451	kduD; 2-dehydro-3-deoxy-D-gluconate 5-dehydrogenase [EC:1.1.1.127]
K00067	0.0841338	0.1274	0.0685618	0.0407284	rfbD, rmlD; dTDP-4-dehydrorhamnose reductase [EC:1.1.1.133]
K00068	0.080197	0.0377829	0.0173496	0.0860648	srlD; sorbitol-6-phosphate 2-dehydrogenase [EC:1.1.1.140]
K00073	0.00150186	0	0.0148404	0.00150931	allD; ureidoglycolate dehydrogenase (NAD+) [EC:1.1.1.350]
K00074	0.0359971	0.100505	0.143563	0.0923445	paaH, hbd, fadB, mmgB; 3-hydroxybutyryl-CoA dehydrogenase [EC:1.1.1.157]
K00075	0.168212	0.13362	0.119274	0.144588	murB; UDP-N-acetylmuramate dehydrogenase [EC:1.3.1.98]
K00077	0.353154	0.168641	0.132498	0.302801	panE, apbA; 2-dehydropantoate 2-reductase [EC:1.1.1.169]
K00086	0.0498511	0.0415437	0.0119694	0.037506	dhaT; 1,3-propanediol dehydrogenase [EC:1.1.1.202]
K00088	0.331805	0.240181	0.190251	0.296362	IMPDH, guaB; IMP dehydrogenase [EC:1.1.1.205]
K00090	0.000324333	0.000141375	0.0615145	0.0223783	ghrB; glyoxylate/hydroxypyruvate/2-ketogluconate reductase [EC:1.1.1.79 1.1.1.81 1.1.1.215]
K00096	0.00188025	0.0756336	0.0970113	0.0202538	araM, egsA; glycerol-1-phosphate dehydrogenase [NAD(P)+] [EC:1.1.1.261]
K00097	0.00179285	0.00245565	0.0177016	0.00694194	pdxA; 4-hydroxythreonine-4-phosphate dehydrogenase [EC:1.1.1.262]
K00098	0.00559707	0.00123478	0	0.00318817	idnD; L-idonate 5-dehydrogenase [EC:1.1.1.264]
K00099	0.0483931	0.120629	0.137468	0.0476708	dxr; 1-deoxy-D-xylulose-5-phosphate reductoisomerase [EC:1.1.1.267]
K00100	0.00023143	0.0302718	0.0630831	0.0253171	bdhAB; butanol dehydrogenase [EC:1.1.1.-]
K00104	0.0850212	0.195238	0.295914	0.188747	glcD; glycolate oxidase [EC:1.1.3.15]
K00105	0.0800001	0.0198051	0.00210336	0.0829575	E1.1.3.21; alpha-glycerophosphate oxidase [EC:1.1.3.21]
K00111	0.0218576	0.299426	0.464619	0.129474	glpA, glpD; glycerol-3-phosphate dehydrogenase [EC:1.1.5.3]
K00112	0.00240399	0.00318833	0.0108333	0.00902179	glpB; glycerol-3-phosphate dehydrogenase subunit B [EC:1.1.5.3]
K00113	0.00291395	0.00332214	0.00981988	0.0093933	glpC; glycerol-3-phosphate dehydrogenase subunit C
K00121	0.0122528	0.0293028	0.0157036	0.0205299	frmA, ADH5, adhC; S-(hydroxymethyl)glutathione dehydrogenase / alcohol dehydrogenase [EC:1.1.1.284 1.1.1.1]
K00122	0.000676117	0.000222462	0	0.00101646	FDH; formate dehydrogenase [EC:1.17.1.9]
K00128	0.00392864	0.121304	0.0532655	0.00123673	ALDH; aldehyde dehydrogenase (NAD+) [EC:1.2.1.3]
K00130	0.0127234	0.0555997	0.0199609	0.0264447	betB, gbsA; betaine-aldehyde dehydrogenase [EC:1.2.1.8]
K00131	0.0164243	0.0699282	0.0397949	0.0303842	gapN; glyceraldehyde-3-phosphate dehydrogenase (NADP+) [EC:1.2.1.9]
K00133	0.220814	0.164773	0.130351	0.190939	asd; aspartate-semialdehyde dehydrogenase [EC:1.2.1.11]
K00134	0.198348	0.18049	0.165791	0.200466	GAPDH, gapA; glyceraldehyde 3-phosphate dehydrogenase [EC:1.2.1.12]
K00135	0.437229	0.0762906	0.0114257	0.356362	gabD; succinate-semialdehyde dehydrogenase / glutarate-semialdehyde dehydrogenase [EC:1.2.1.16 1.2.1.79 1.2.1.20]
K00140	0.00521394	0.00522386	0.0293523	0.00701813	mmsA, iolA, ALDH6A1; malonate-semialdehyde dehydrogenase (acetylating) / methylmalonate-semialdehyde dehydrogenase [EC:1.2.1.18 1.2.1.27]
K00145	0.187156	0.102174	0.0962092	0.138989	argC; N-acetyl-gamma-glutamyl-phosphate reductase [EC:1.2.1.38]
K00147	0.218194	0.149643	0.126043	0.177037	proA; glutamate-5-semialdehyde dehydrogenase [EC:1.2.1.41]
K00158	0.399202	0.0933761	0.00276726	0.417116	E1.2.3.3, poxL; pyruvate oxidase [EC:1.2.3.3]
K00161	0.120068	0.0220866	0.00119313	0.0785298	PDHA, pdhA; pyruvate dehydrogenase E1 component alpha subunit [EC:1.2.4.1]
K00162	0.104235	0.0196601	0.000959739	0.0655807	PDHB, pdhB; pyruvate dehydrogenase E1 component beta subunit [EC:1.2.4.1]
K00166	0.00218675	0.00302982	0	0.00412708	BCKDHA, bkdA1; 2-oxoisovalerate dehydrogenase E1 component alpha subunit [EC:1.2.4.4]
K00167	0.00224839	0.00244653	2.34306e-05	0.00447376	BCKDHB, bkdA2; 2-oxoisovalerate dehydrogenase E1 component beta subunit [EC:1.2.4.4]
K00174	0.00267168	0.14108	0.0822567	0.00711106	korA, oorA, oforA; 2-oxoglutarate/2-oxoacid ferredoxin oxidoreductase subunit alpha [EC:1.2.7.3 1.2.7.11]
K00175	0.00142107	0.0922144	0.060785	0.00530965	korB, oorB, oforB; 2-oxoglutarate/2-oxoacid ferredoxin oxidoreductase subunit beta [EC:1.2.7.3 1.2.7.11]
K00176	0.000289383	0.0149054	0.0116336	0.00128402	korD, oorD; 2-oxoglutarate ferredoxin oxidoreductase subunit delta [EC:1.2.7.3]
K00177	0.000900727	0.0427358	0.0311922	0.00307685	korC, oorC; 2-oxoglutarate ferredoxin oxidoreductase subunit gamma [EC:1.2.7.3]
K00196	0.00109678	0.0255348	0.0115332	0.000154887	cooF; anaerobic carbon-monoxide dehydrogenase iron sulfur subunit
K00198	0.00064409	0.146321	0.236511	0.0381232	cooS, acsA; anaerobic carbon-monoxide dehydrogenase catalytic subunit [EC:1.2.7.4]
K00208	0.0383117	0.0136531	0.00901295	0.0494713	fabI; enoyl-[acyl-carrier protein] reductase I [EC:1.3.1.9 1.3.1.10]
K00215	0.123234	0.109608	0.106114	0.109796	dapB; 4-hydroxy-tetrahydrodipicolinate reductase [EC:1.17.1.8]
K00226	0.15357	0.0207603	0.000777489	0.111028	pyrD; dihydroorotate dehydrogenase (fumarate) [EC:1.3.98.1]
K00231	0.00218793	0.00296776	0	0.00781267	PPOX, hemY; protoporphyrinogen/coproporphyrinogen III oxidase [EC:1.3.3.4 1.3.3.15]
K00239	0.103736	0.0186334	0.0286953	0.0963491	sdhA, frdA; succinate dehydrogenase / fumarate reductase, flavoprotein subunit [EC:1.3.5.1 1.3.5.4]
K00240	0.0543312	0.00960302	0.00658003	0.049236	sdhB, frdB; succinate dehydrogenase / fumarate reductase, iron-sulfur subunit [EC:1.3.5.1 1.3.5.4]
K00241	0.00154855	0.00171452	0.00471526	0.00498986	sdhC, frdC; succinate dehydrogenase / fumarate reductase, cytochrome b subunit
K00243	0.0923783	0.0914564	0.0916976	0.084471	K00243; uncharacterized protein
K00244	0.289393	0.281622	0.0692753	0.262956	frdA; fumarate reductase flavoprotein subunit [EC:1.3.5.4]
K00254	0.00246478	0.0107928	0.0113483	0.00793887	DHODH, pyrD; dihydroorotate dehydrogenase [EC:1.3.5.2]
K00259	0.0058235	0.00696373	0	0.0133449	ald; alanine dehydrogenase [EC:1.4.1.1]
K00261	0.000274895	0.00590559	0.00528412	0.000824514	GLUD1_2, gdhA; glutamate dehydrogenase (NAD(P)+) [EC:1.4.1.3]
K00262	0.110345	0.109931	0.16834	0.180529	E1.4.1.4, gdhA; glutamate dehydrogenase (NADP+) [EC:1.4.1.4]
K00265	0.588997	0.393624	0.413975	0.61688	gltB; glutamate synthase (NADPH) large chain [EC:1.4.1.13]
K00266	0.21263	0.449622	0.331134	0.25884	gltD; glutamate synthase (NADPH) small chain [EC:1.4.1.13]
K00274	0.00308955	0.133581	0.0542449	0.000495209	MAO, aofH; monoamine oxidase [EC:1.4.3.4]
K00278	0.149311	0.0932255	0.125244	0.189078	nadB; L-aspartate oxidase [EC:1.4.3.16]
K00286	0.240596	0.140267	0.121591	0.196951	proC; pyrroline-5-carboxylate reductase [EC:1.5.1.2]
K00287	0.0914072	0.0492212	0.0478155	0.0764342	DHFR, folA; dihydrofolate reductase [EC:1.5.1.3]
K00290	0.00556047	0.0560837	0.0290008	0.00818497	LYS1; saccharopine dehydrogenase (NAD+, L-lysine forming) [EC:1.5.1.7]
K00297	0.142041	0.0538473	0.0484083	0.106975	metF, MTHFR; methylenetetrahydrofolate reductase (NADPH) [EC:1.5.1.20]
K00298	0.000122133	0.000187091	0.00223447	0	ceo; N5-(carboxyethyl)ornithine synthase [EC:1.5.1.24]
K00299	0.0360069	0.00600436	0.00486491	0.0332334	ssuE; FMN reductase [EC:1.5.1.38]
K00303	0.00192223	0.00878258	0.0397528	0.0104669	soxB; sarcosine oxidase, subunit beta [EC:1.5.3.1]
K00323	3.02473e-05	0	0	0	NNT; H+-translocating NAD(P) transhydrogenase [EC:1.6.1.2 7.1.1.1]
K00324	0.083952	0.0107315	0.011834	0.0738551	pntA; H+-translocating NAD(P) transhydrogenase subunit alpha [EC:1.6.1.2 7.1.1.1]
K00325	0.0758729	0.00971826	0.00999184	0.0662164	pntB; H+-translocating NAD(P) transhydrogenase subunit beta [EC:1.6.1.2 7.1.1.1]
K00330	0.000613758	0.0110411	0.0047228	0.00227952	nuoA; NADH-quinone oxidoreductase subunit A [EC:7.1.1.2]
K00331	0.00130148	0.0159373	0.00625934	0.0049282	nuoB; NADH-quinone oxidoreductase subunit B [EC:7.1.1.2]
K00334	0.000860185	0.0295701	0.0243158	0.000208758	nuoE; NADH-quinone oxidoreductase subunit E [EC:7.1.1.2]
K00335	0.00359092	0.102264	0.0660011	0.00051102	nuoF; NADH-quinone oxidoreductase subunit F [EC:7.1.1.2]
K00336	0.00305672	0.159151	0.128782	0.000180356	nuoG; NADH-quinone oxidoreductase subunit G [EC:7.1.1.2]
K00337	0.00188271	0.032767	0.00936094	0.00625879	nuoH; NADH-quinone oxidoreductase subunit H [EC:7.1.1.2]
K00338	0.00102392	0.0134473	0.00567194	0.00337103	nuoI; NADH-quinone oxidoreductase subunit I [EC:7.1.1.2]
K00339	0.000800072	0.00659867	0.00456429	0.00382295	nuoJ; NADH-quinone oxidoreductase subunit J [EC:7.1.1.2]
K00340	0.000601346	0.000822554	0.00243271	0.00187495	nuoK; NADH-quinone oxidoreductase subunit K [EC:7.1.1.2]
K00341	0.00339829	0.0572029	0.0141697	0.0115237	nuoL; NADH-quinone oxidoreductase subunit L [EC:7.1.1.2]
K00342	0.00188694	0.0498892	0.0148663	0.00904619	nuoM; NADH-quinone oxidoreductase subunit M [EC:7.1.1.2]
K00343	0.00271345	0.0465904	0.0147274	0.00891312	nuoN; NADH-quinone oxidoreductase subunit N [EC:7.1.1.2]
K00344	0.0504452	0.00754647	0.00992685	0.0607795	qor, CRYZ; NADPH:quinone reductase [EC:1.6.5.5]
K00346	0.002288	0.00265553	0	0.00813074	nqrA; Na+-transporting NADH:ubiquinone oxidoreductase subunit A [EC:7.2.1.1]
K00347	0.00179035	0.00246744	0	0.00660198	nqrB; Na+-transporting NADH:ubiquinone oxidoreductase subunit B [EC:7.2.1.1]
K00348	0.00109013	0.00130741	0	0.00383383	nqrC; Na+-transporting NADH:ubiquinone oxidoreductase subunit C [EC:7.2.1.1]
K00349	0.00117274	0.00167481	0	0.00290186	nqrD; Na+-transporting NADH:ubiquinone oxidoreductase subunit D [EC:7.2.1.1]
K00350	0.000770841	0.00137181	0	0.00359531	nqrE; Na+-transporting NADH:ubiquinone oxidoreductase subunit E [EC:7.2.1.1]
K00351	0.00193312	0.00296397	0.000562335	0.00688285	nqrF; Na+-transporting NADH:ubiquinone oxidoreductase subunit F [EC:7.2.1.1]
K00354	2.90612e-05	0.0252645	0.00678694	0	E1.6.99.1; NADPH2 dehydrogenase [EC:1.6.99.1]
K00355	0.0529473	0.00893897	0.000387624	0.0280391	NQO1; NAD(P)H dehydrogenase (quinone) [EC:1.6.5.2]
K00362	0.00195227	0.0411493	0.0511966	0.000162685	nirB; nitrite reductase (NADH) large subunit [EC:1.7.1.15]
K00364	0.0956642	0.0358415	0.0172269	0.0770092	E1.7.1.7, guaC; GMP reductase [EC:1.7.1.7]
K00366	0.0236915	0.162771	0.137087	0.0639785	nirA; ferredoxin-nitrite reductase [EC:1.7.7.1]
K00372	0.00398964	0.0804686	0.136786	0.0438606	nasA; assimilatory nitrate reductase catalytic subunit [EC:1.7.99.-]
K00375	0.00534882	0.113994	0.091912	0.00568918	K00375; GntR family transcriptional regulator / MocR family aminotransferase
K00376	0.000532506	0.000207891	0	0.00749961	nosZ; nitrous-oxide reductase [EC:1.7.2.4]
K00380	0.0968407	0.0141857	0.0174066	0.0921459	cysJ; sulfite reductase (NADPH) flavoprotein alpha-component [EC:1.8.1.2]
K00382	0.281122	0.120769	0.212391	0.250013	DLD, lpd, pdhD; dihydrolipoamide dehydrogenase [EC:1.8.1.4]
K00383	0.240104	0.063734	0.0127499	0.201415	GSR, gor; glutathione reductase (NADPH) [EC:1.8.1.7]
K00384	0.396983	0.381032	0.263193	0.310411	trxB, TRR; thioredoxin reductase (NADPH) [EC:1.8.1.9]
K00385	0.00475337	0.132755	0.111364	0.0207273	asrC; anaerobic sulfite reductase subunit C
K00389	0.000253756	0.000326574	0.0192298	0.00656935	yidH; putative membrane protein
K00390	0.00151843	0.0589876	0.0143953	0.00536209	cysH; phosphoadenosine phosphosulfate reductase [EC:1.8.4.8 1.8.4.10]
K00392	0.00599872	0.00777594	0.133319	0.0739267	sir; sulfite reductase (ferredoxin) [EC:1.8.7.1]
K00394	0.0172836	0.0572664	0.0976668	0.0681883	aprA; adenylylsulfate reductase, subunit A [EC:1.8.99.2]
K00395	0.00325663	0.0106577	0.0187433	0.0139534	aprB; adenylylsulfate reductase, subunit B [EC:1.8.99.2]
K00412	0.00483754	0.00271471	0	0.0148393	CYTB, petB; ubiquinol-cytochrome c reductase cytochrome b subunit
K00425	0.208879	0.0558422	0.0307907	0.164995	cydA; cytochrome bd ubiquinol oxidase subunit I [EC:7.1.1.7]
K00426	0.143901	0.0443892	0.0251841	0.118573	cydB; cytochrome bd ubiquinol oxidase subunit II [EC:7.1.1.7]
K00432	0.092044	0.0738298	0.0303659	0.0663388	gpx, btuE, bsaA; glutathione peroxidase [EC:1.11.1.9]
K00433	0.00195739	0.0890716	0.0910248	0.0201427	cpo; non-heme chloroperoxidase [EC:1.11.1.10]
K00435	0.000157168	0.000244597	0	0.000114824	hemQ; hydrogen peroxide-dependent heme synthase [EC:1.3.98.5]
K00483	0.000962874	0.00224153	0	0.000775222	hpaB; 4-hydroxyphenylacetate 3-monooxygenase [EC:1.14.14.9]
K00525	0.537007	0.37146	0.373458	0.617384	E1.17.4.1A, nrdA, nrdE; ribonucleoside-diphosphate reductase alpha chain [EC:1.17.4.1]
K00526	0.355851	0.155738	0.0701641	0.272197	E1.17.4.1B, nrdB, nrdF; ribonucleoside-diphosphate reductase beta chain [EC:1.17.4.1]
K00527	0.0343979	0.010883	0	0.0631052	rtpR; ribonucleoside-triphosphate reductase (thioredoxin) [EC:1.17.4.2]
K00528	0.0930403	0.149762	0.0985204	0.0916565	fpr; ferredoxin/flavodoxin---NADP+ reductase [EC:1.18.1.2 1.19.1.1]
K00537	0.0343572	0.0333701	0.0234573	0.0309027	arsC; arsenate reductase (glutaredoxin) [EC:1.20.4.1]
K00547	0.109652	0.0294739	0.0158834	0.0656226	mmuM, BHMT2; homocysteine S-methyltransferase [EC:2.1.1.10]
K00548	0.0191983	0.24598	0.310466	0.0799662	metH, MTR; 5-methyltetrahydrofolate--homocysteine methyltransferase [EC:2.1.1.13]
K00549	0.349746	0.142257	0.211882	0.368269	metE; 5-methyltetrahydropteroyltriglutamate--homocysteine methyltransferase [EC:2.1.1.14]
K00554	0.134531	0.0887153	0.0864592	0.117696	trmD; tRNA (guanine37-N1)-methyltransferase [EC:2.1.1.228]
K00558	0.0995667	0.110623	0.16936	0.326973	DNMT1, dcm; DNA (cytosine-5)-methyltransferase 1 [EC:2.1.1.37]
K00560	0.165692	0.0823637	0.0218536	0.154064	thyA, TYMS; thymidylate synthase [EC:2.1.1.45]
K00561	0.00126984	0	0	0	ermC, ermA; 23S rRNA (adenine-N6)-dimethyltransferase [EC:2.1.1.184]
K00563	0.0860343	0.0501601	0.015271	0.0711392	rlmA1; 23S rRNA (guanine745-N1)-methyltransferase [EC:2.1.1.187]
K00564	0.07036	0.0128382	0.00963325	0.0415583	rsmC; 16S rRNA (guanine1207-N2)-methyltransferase [EC:2.1.1.172]
K00566	0.0621473	0.125137	0.127867	0.107631	mnmA, trmU; tRNA-uridine 2-sulfurtransferase [EC:2.8.1.13]
K00567	0.0149155	0.0707734	0.0772014	0.0199609	ogt, MGMT; methylated-DNA-[protein]-cysteine S-methyltransferase [EC:2.1.1.63]
K00571	5.58771e-05	0	0.0224875	0.0172411	E2.1.1.72; site-specific DNA-methyltransferase (adenine-specific) [EC:2.1.1.72]
K00574	0.278546	0.135109	0.104048	0.234333	cfa; cyclopropane-fatty-acyl-phospholipid synthase [EC:2.1.1.79]
K00575	0.04093	0.0931265	0.082728	0.0516883	cheR; chemotaxis protein methyltransferase CheR [EC:2.1.1.80]
K00595	0.000607573	0.000653594	0.0244866	0.000149235	cobL; precorrin-6Y C5,15-methyltransferase (decarboxylating) [EC:2.1.1.132]
K00596	0.0289961	0.00338109	0	0.0471673	E4.1.1.64; 2,2-dialkylglycine decarboxylase (pyruvate) [EC:4.1.1.64]
K00600	0.203738	0.15834	0.156796	0.182045	glyA, SHMT; glycine hydroxymethyltransferase [EC:2.1.2.1]
K00602	0.252823	0.219544	0.289876	0.268596	purH; phosphoribosylaminoimidazolecarboxamide formyltransferase / IMP cyclohydrolase [EC:2.1.2.3 3.5.4.10]
K00603	3.41871e-05	0.0536746	0.0399983	0.000163329	fctD; glutamate formiminotransferase / 5-formyltetrahydrofolate cyclo-ligase [EC:2.1.2.5 6.3.3.2]
K00604	0.154558	0.139981	0.134179	0.132005	MTFMT, fmt; methionyl-tRNA formyltransferase [EC:2.1.2.9]
K00606	0.0046533	0.0514657	0.0659821	0.0219933	panB; 3-methyl-2-oxobutanoate hydroxymethyltransferase [EC:2.1.2.11]
K00609	0.155184	0.112218	0.11533	0.141086	pyrB, PYR2; aspartate carbamoyltransferase catalytic subunit [EC:2.1.3.2]
K00610	0.0224939	0.0352965	0.0471557	0.0319571	pyrI; aspartate carbamoyltransferase regulatory subunit
K00611	0.177883	0.169721	0.148025	0.142892	OTC, argF, argI; ornithine carbamoyltransferase [EC:2.1.3.3]
K00615	0.323872	0.581864	0.481342	0.263656	E2.2.1.1, tktA, tktB; transketolase [EC:2.2.1.1]
K00616	0.0668494	0.173034	0.0997137	0.0544842	E2.2.1.2, talA, talB; transaldolase [EC:2.2.1.2]
K00620	0.207715	0.114579	0.110532	0.153844	argJ; glutamate N-acetyltransferase / amino-acid N-acetyltransferase [EC:2.3.1.35 2.3.1.1]
K00624	0.00236772	0	0	0.00235457	E2.3.1.7; carnitine O-acetyltransferase [EC:2.3.1.7]
K00625	0.107493	0.0981775	0.0875083	0.0966115	E2.3.1.8, pta; phosphate acetyltransferase [EC:2.3.1.8]
K00626	0.102517	0.143914	0.182996	0.166968	E2.3.1.9, atoB; acetyl-CoA C-acetyltransferase [EC:2.3.1.9]
K00627	0.190612	0.0439144	0.105215	0.166501	DLAT, aceF, pdhC; pyruvate dehydrogenase E2 component (dihydrolipoamide acetyltransferase) [EC:2.3.1.12]
K00632	0.00185576	0	0.022728	0.0019065	fadA, fadI; acetyl-CoA acyltransferase [EC:2.3.1.16]
K00633	0.00732456	0.036897	0.0233417	0.00244621	lacA; galactoside O-acetyltransferase [EC:2.3.1.18]
K00634	0.00439442	0.112908	0.0573321	0.00395881	ptb; phosphate butyryltransferase [EC:2.3.1.19]
K00639	0.000208385	0.0372973	0.0464216	0	kbl, GCAT; glycine C-acetyltransferase [EC:2.3.1.29]
K00640	0.117005	0.0770491	0.0835485	0.0910952	cysE; serine O-acetyltransferase [EC:2.3.1.30]
K00645	0.10354	0.112551	0.120372	0.0914731	fabD, MCAT, MCT1; [acyl-carrier-protein] S-malonyltransferase [EC:2.3.1.39]
K00648	0.212535	0.20547	0.176906	0.152743	fabH; 3-oxoacyl-[acyl-carrier-protein] synthase III [EC:2.3.1.180]
K00651	0.202826	0.10364	0.153052	0.192868	metA; homoserine O-succinyltransferase/O-acetyltransferase [EC:2.3.1.46 2.3.1.31]
K00652	0.00276064	0.0152593	0.0548363	0.031178	bioF; 8-amino-7-oxononanoate synthase [EC:2.3.1.47]
K00655	0.102903	0.184365	0.18154	0.112503	plsC; 1-acyl-sn-glycerol-3-phosphate acyltransferase [EC:2.3.1.51]
K00656	0.313661	0.504324	0.46627	0.360028	E2.3.1.54, pflD; formate C-acetyltransferase [EC:2.3.1.54]
K00657	0.0287843	0.0380935	0.0300051	0.00105595	speG, SAT; diamine N-acetyltransferase [EC:2.3.1.57]
K00658	0.0109906	0.00794624	0.0114339	0.0153286	DLST, sucB; 2-oxoglutarate dehydrogenase E2 component (dihydrolipoamide succinyltransferase) [EC:2.3.1.61]
K00661	0.148949	0.102635	0.0533621	0.149085	maa; maltose O-acetyltransferase [EC:2.3.1.79]
K00662	0.00173821	0.0396539	0.0237321	0.000262986	aacC; aminoglycoside 3-N-acetyltransferase [EC:2.3.1.81]
K00666	0.00221178	0.0069793	0.035853	0.0100743	K00666; fatty-acyl-CoA synthase [EC:6.2.1.-]
K00674	0.053667	0.0588003	0.0658158	0.0592491	dapD; 2,3,4,5-tetrahydropyridine-2,6-dicarboxylate N-succinyltransferase [EC:2.3.1.117]
K00677	0.00331437	0.0162807	0.0124438	0.0113432	lpxA; UDP-N-acetylglucosamine acyltransferase [EC:2.3.1.129]
K00681	0.0128877	0.0727849	0.0904813	0.0125904	ggt; gamma-glutamyltranspeptidase / glutathione hydrolase [EC:2.3.2.2 3.4.19.13]
K00684	0.0012365	0.0223764	0.00900775	0	aat; leucyl/phenylalanyl-tRNA---protein transferase [EC:2.3.2.6]
K00686	0.000278962	0.000405215	0.0411673	0.017615	tgl; protein-glutamine gamma-glutamyltransferase [EC:2.3.2.13]
K00688	0.178625	0.43311	0.393402	0.217427	PYG, glgP; glycogen phosphorylase [EC:2.4.1.1]
K00690	0.188535	0.093732	0.00766314	0.10426	E2.4.1.7; sucrose phosphorylase [EC:2.4.1.7]
K00691	0.0988771	0.0562527	0.0277344	0.07652	mapA; maltose phosphorylase [EC:2.4.1.8]
K00692	0.0971213	0.0238161	0.121305	0.0632905	sacB; levansucrase [EC:2.4.1.10]
K00694	0.24043	0.0811427	0.120584	0.172846	bcsA; cellulose synthase (UDP-forming) [EC:2.4.1.12]
K00700	0.148882	0.292022	0.263927	0.15922	GBE1, glgB; 1,4-alpha-glucan branching enzyme [EC:2.4.1.18]
K00702	0.00537327	0.00196901	0.0174614	0.00243684	E2.4.1.20; cellobiose phosphorylase [EC:2.4.1.20]
K00703	0.0203161	0.14714	0.170469	0.0546632	glgA; starch synthase [EC:2.4.1.21]
K00705	0.132347	0.176633	0.154593	0.147464	malQ; 4-alpha-glucanotransferase [EC:2.4.1.25]
K00710	0.00382633	0.000770164	0	0.00755691	GALNT; polypeptide N-acetylgalactosaminyltransferase [EC:2.4.1.41]
K00712	0.113493	0.0349203	0.00170585	0.0915323	tagE; poly(glycerol-phosphate) alpha-glucosyltransferase [EC:2.4.1.52]
K00721	0.0463696	0.00813956	0.0268271	0.0437911	DPM1; dolichol-phosphate mannosyltransferase [EC:2.4.1.83]
K00728	0.0892761	0.01074	8.34334e-05	0.0771544	POMT, pmt; dolichyl-phosphate-mannose-protein mannosyltransferase [EC:2.4.1.109]
K00748	0.00270002	0.014433	0.015383	0.00931117	lpxB; lipid-A-disaccharide synthase [EC:2.4.1.182]
K00752	0.00467025	0.0684267	0.0457348	5.08659e-05	hasA; hyaluronan synthase [EC:2.4.1.212]
K00756	0.0202449	0.140924	0.150093	0.0622409	pdp; pyrimidine-nucleoside phosphorylase [EC:2.4.2.2]
K00757	0.0058407	0.0331382	0.0418758	0.00655512	udp, UPP; uridine phosphorylase [EC:2.4.2.3]
K00759	0.13568	0.0705132	0.0626758	0.106391	APRT, apt; adenine phosphoribosyltransferase [EC:2.4.2.7]
K00760	0.127423	0.123709	0.0961197	0.0852932	hprT, hpt, HPRT1; hypoxanthine phosphoribosyltransferase [EC:2.4.2.8]
K00761	0.113324	0.0858546	0.0807489	0.0971183	upp, UPRT; uracil phosphoribosyltransferase [EC:2.4.2.9]
K00762	0.102896	0.0900845	0.0762392	0.0935994	pyrE; orotate phosphoribosyltransferase [EC:2.4.2.10]
K00763	0.357723	0.226521	0.18043	0.34163	pncB, NAPRT1; nicotinate phosphoribosyltransferase [EC:6.3.4.21]
K00764	0.245373	0.208541	0.185222	0.209055	purF, PPAT; amidophosphoribosyltransferase [EC:2.4.2.14]
K00765	0.1451	0.063545	0.0654109	0.0963146	hisG; ATP phosphoribosyltransferase [EC:2.4.2.17]
K00766	0.172268	0.0717292	0.0731642	0.141965	trpD; anthranilate phosphoribosyltransferase [EC:2.4.2.18]
K00767	0.0721559	0.0549764	0.0742857	0.100451	nadC, QPRT; nicotinate-nucleotide pyrophosphorylase (carboxylating) [EC:2.4.2.19]
K00768	0.00629806	0.104574	0.122366	0.0328921	E2.4.2.21, cobU, cobT; nicotinate-nucleotide--dimethylbenzimidazole phosphoribosyltransferase [EC:2.4.2.21]
K00772	0.000201988	0.0034	0.00208237	0.000410289	mtaP, MTAP; 5'-methylthioadenosine phosphorylase [EC:2.4.2.28]
K00917	0.0119975	0.0452885	0.0415943	0.00796477	tgt, QTRT1; queuine tRNA-ribosyltransferase [EC:2.4.2.29]
K00919	0.0764248	0.113497	0.108782	0.0995427	lldG; L-lactate dehydrogenase complex protein LldG
K00925	0.40432	0.217701	0.151204	0.363985	rlmH; 23S rRNA (pseudouridine1915-N3)-methyltransferase [EC:2.1.1.177]
K00926	0.0307565	0.0554332	0.0961244	0.0590224	rnz; ribonuclease Z [EC:3.1.26.11]
K00927	0.212786	0.162891	0.151339	0.173951	thiE; thiamine-phosphate pyrophosphorylase [EC:2.5.1.3]
K00928	0.280648	0.234841	0.253672	0.306814	metK; S-adenosylmethionine synthetase [EC:2.5.1.6]
K00929	0.00751901	0.207617	0.090819	0.0068465	murA; UDP-N-acetylglucosamine 1-carboxyvinyltransferase [EC:2.5.1.7]
K00930	0.143173	0.0842098	0.0861753	0.111457	miaA, TRIT1; tRNA dimethylallyltransferase [EC:2.5.1.75]
K00931	0.162512	0.108526	0.106422	0.136009	ribE, RIB5; riboflavin synthase [EC:2.5.1.9]
K00936	0.0808078	0.0645077	0.0993979	0.0978793	ribH, RIB4; 6,7-dimethyl-8-ribityllumazine synthase [EC:2.5.1.78]
K00937	0.37201	0.133579	0.182647	0.321092	ispA; farnesyl diphosphate synthase [EC:2.5.1.1 2.5.1.10]
K00938	0.133145	0.0193502	0.00332257	0.0706686	folP; dihydropteroate synthase [EC:2.5.1.15]
K00939	0.109116	0.112753	0.0857416	0.0958154	speE, SRM; spermidine synthase [EC:2.5.1.16]
K00940	0.0131637	0.0301044	0.0314265	0.0151692	MMAB, pduO; cob(I)alamin adenosyltransferase [EC:2.5.1.17]
K00941	0.164087	0.100961	0.0912723	0.114071	GST, gst; glutathione S-transferase [EC:2.5.1.18]
K00942	0.183187	0.0937954	0.103242	0.200015	aroA; 3-phosphoshikimate 1-carboxyvinyltransferase [EC:2.5.1.19]
K00943	0.117536	0.0935949	0.0706666	0.0995707	hepST; heptaprenyl diphosphate synthase [EC:2.5.1.30]
K00945	0.0700733	0.0802543	0.0793078	0.0654465	uppS; undecaprenyl diphosphate synthase [EC:2.5.1.31]
K00946	0.00210033	0.01502	0.0140913	0.00830759	aspB; aspartate aminotransferase [EC:2.6.1.1]
K00948	0.304833	0.214223	0.153691	0.250437	hisC; histidinol-phosphate aminotransferase [EC:2.6.1.9]
K00949	0.107151	0.0738183	0.0689156	0.0872601	glmS, GFPT; glutamine---fructose-6-phosphate transaminase (isomerizing) [EC:2.6.1.16]
K00950	0.0114888	0.0188825	0.0157201	0.00515648	argD; acetylornithine/N-succinyldiaminopimelate aminotransferase [EC:2.6.1.11 2.6.1.17]
K00951	0.362254	0.289735	0.273856	0.329804	puuE; 4-aminobutyrate aminotransferase [EC:2.6.1.19]
K00954	0.0810696	0.0592083	0.0611534	0.0681872	dat; D-alanine transaminase [EC:2.6.1.21]
K00955	0.0131688	0.00186412	0.102201	0.0736968	E2.6.1.42, ilvE; branched-chain amino acid aminotransferase [EC:2.6.1.42]
K00956	0.0072245	0.0634801	0.0218955	0.00870543	serC, PSAT1; phosphoserine aminotransferase [EC:2.6.1.52]
K00957	0.0115177	0.031522	0.0558388	0.0392142	tyrB; aromatic-amino-acid transaminase [EC:2.6.1.57]
K00958	0.000844341	0.00167992	0	0.000669984	bioA; adenosylmethionine---8-amino-7-oxononanoate aminotransferase [EC:2.6.1.62]
K00962	0.149724	0.237503	0.264111	0.186041	pucG; (S)-ureidoglycine---glyoxylate transaminase [EC:2.6.1.112]
K00963	0.231605	0.230957	0.215901	0.220151	patA; aminotransferase [EC:2.6.1.-]
K00965	0.121826	0.159219	0.0834632	0.0951208	glk; glucokinase [EC:2.7.1.2]
K00966	0.00125454	0.000927111	0.0558659	0.0244704	E2.7.1.4, scrK; fructokinase [EC:2.7.1.4]
K00969	0.104484	0.0840141	0.0774695	0.0879046	rhaB; rhamnulokinase [EC:2.7.1.5]
K00970	0.0794123	0.0241359	0.110314	0.104683	galK; galactokinase [EC:2.7.1.6]
K00971	0.122507	0.155002	0.109919	0.152172	pfkA, PFK; 6-phosphofructokinase 1 [EC:2.7.1.11]
K00973	0.1373	0.111785	0.0731806	0.0855789	E2.7.1.12, gntK, idnK; gluconokinase [EC:2.7.1.12]
K00974	0.122623	0.146712	0.159816	0.118252	rbsK, RBKS; ribokinase [EC:2.7.1.15]
K00975	0.0934707	0.23858	0.258496	0.128548	xylB, XYLB; xylulokinase [EC:2.7.1.17]
K00978	0.004275	0.0289018	0.0127807	0.0109896	tdk, TK; thymidine kinase [EC:2.7.1.21]
K00979	0.00154634	0.0105031	0.0101949	0.00468739	ppnK, NADK; NAD+ kinase [EC:2.7.1.23]
K00980	0.0371168	0.0217261	0.0216058	0.0262719	coaE; dephospho-CoA kinase [EC:2.7.1.24]
K00981	0.132718	0.10091	0.101786	0.118137	cysC; adenylylsulfate kinase [EC:2.7.1.25]
K00982	0.159629	0.0453644	0.0291909	0.125251	glpK, GK; glycerol kinase [EC:2.7.1.30]
K00986	3.51191e-05	0	0.0386587	0.00255403	glxK, garK; glycerate 2-kinase [EC:2.7.1.165]
K00989	0.0399925	0.0209526	0.0127299	0.0324809	coaA; type I pantothenate kinase [EC:2.7.1.33]
K00990	0.0999063	0.0279084	0.0262883	0.0812944	pdxK, pdxY; pyridoxine kinase [EC:2.7.1.35]
K00991	0.0432803	0.107392	0.100089	0.0622718	E2.7.1.36, MVK, mvaK1; mevalonate kinase [EC:2.7.1.36]
K00995	0.155928	0.0737139	0.0796103	0.123353	thrB; homoserine kinase [EC:2.7.1.39]
K00997	0.0754668	0.0519154	0.0495413	0.0612102	PK, pyk; pyruvate kinase [EC:2.7.1.40]
K01000	0.164648	0.123278	0.114564	0.143383	kdgK; 2-dehydro-3-deoxygluconokinase [EC:2.7.1.45]
K01005	0.332256	0.393506	0.252694	0.238768	udk, UCK; uridine kinase [EC:2.7.1.48]
K01006	0.0348369	0.251626	0.283402	0.120763	thiM; hydroxyethylthiazole kinase [EC:2.7.1.50]
K01007	0.023897	0.0340585	0.0286853	0.0169083	lyxK; L-xylulokinase [EC:2.7.1.53]
K01008	0.00207482	0.0891764	0.137909	0.0224678	fruK; 1-phosphofructokinase [EC:2.7.1.56]
K01012	0.0439964	0.209707	0.226094	0.09448	ppgK; polyphosphate glucokinase [EC:2.7.1.63]
K01023	0.00919341	0.0948308	0.0053812	0.00446818	dgkA; undecaprenol kinase [EC:2.7.1.66]
K01026	0.00705924	0.152492	0.17543	0.0711247	aroK, aroL; shikimate kinase [EC:2.7.1.71]
K01034	5.47333e-05	0.0295343	0.0301172	0.00910306	pfp, PFP; diphosphate-dependent phosphofructokinase [EC:2.7.1.90]
K01042	0.00406013	0.0577831	0.116937	0.00463173	mtnK; 5-methylthioribose kinase [EC:2.7.1.100]
K01046	0.0026369	0.0419183	0.00355453	0.000344758	dgkA, DGK; diacylglycerol kinase (ATP) [EC:2.7.1.107]
K01047	0.00211172	0.00156513	0	0.0026667	lpxK; tetraacyldisaccharide 4'-kinase [EC:2.7.1.130]
K01048	0.0647626	0.0971509	0.0192958	0.0518474	lacC; tagatose 6-phosphate kinase [EC:2.7.1.144]
K01051	0.00179768	0.032281	0.0239613	0.00611249	ispE; 4-diphosphocytidyl-2-C-methyl-D-erythritol kinase [EC:2.7.1.148]
K01056	0.0977595	0.0828458	0.0730507	0.0827169	ackA; acetate kinase [EC:2.7.2.1]
K01057	0.0399614	0.0055937	0	0.0373196	arcC; carbamate kinase [EC:2.7.2.2]
K01065	4.29987e-05	0	0	5.50868e-05	PGK, pgk; phosphoglycerate kinase [EC:2.7.2.3]
K01069	0.00337914	0.0618194	0.0908033	0.0187136	lysC; aspartate kinase [EC:2.7.2.4]
K01071	0.0871354	0.016219	0.000657178	0.0539562	buk; butyrate kinase [EC:2.7.2.7]
K01077	0.0762707	0.0644721	0.0239582	0.0281616	argB; acetylglutamate kinase [EC:2.7.2.8]
K01079	0.034082	0.0154299	0.0151006	0.0261912	proB; glutamate 5-kinase [EC:2.7.2.11]
K01081	0.199154	0.0552297	0.0010609	0.0728387	pdtaS; two-component system, sensor histidine kinase PdtaS [EC:2.7.13.3]
K01235	0.00362269	0.00488671	0.0262149	0.0149129	ppk; polyphosphate kinase [EC:2.7.4.1]
K01239	0.272782	0.0746969	0.035171	0.180088	E2.7.4.2, mvaK2; phosphomevalonate kinase [EC:2.7.4.2]
K01243	0.113336	0.117896	0.0920408	0.097921	adk, AK; adenylate kinase [EC:2.7.4.3]
K01246	0.101589	0.0303455	0.0467169	0.0806523	ndk, NME; nucleoside-diphosphate kinase [EC:2.7.4.6]
K01247	8.43875e-05	0.0034366	0.0152571	0.000625057	thiD; hydroxymethylpyrimidine/phosphomethylpyrimidine kinase [EC:2.7.1.49 2.7.4.7]
K01250	0.00781517	0.00185622	0.00849371	0.0185056	E2.7.4.8, gmk; guanylate kinase [EC:2.7.4.8]
K01251	0.000374533	0.017388	0.00582159	0.00135492	tmk, DTYMK; dTMP kinase [EC:2.7.4.9]
K01256	0.333141	0.0908542	0.0294803	0.281779	cmk; CMP/dCMP kinase [EC:2.7.4.25]
K01258	0.178792	0.168247	0.178739	0.194742	thiL; thiamine-monophosphate kinase [EC:2.7.4.16]
K01259	0.0801708	0.0729648	0.034182	0.0987267	PRPS, prsA; ribose-phosphate pyrophosphokinase [EC:2.7.6.1]
K01261	0.0569652	0.00673571	0.00137365	0.0015136	thiN, TPK1, THI80; thiamine pyrophosphokinase [EC:2.7.6.2]
K01262	0.201984	0.421363	0.308812	0.176988	folK; 2-amino-4-hydroxy-6-hydroxymethyldihydropteridine diphosphokinase [EC:2.7.6.3]
K01265	0.177796	0.204392	0.199261	0.193434	relA; GTP pyrophosphokinase [EC:2.7.6.5]
K01266	0.015755	0.0162921	0.0215753	0.0225729	E2.7.7.3A, coaD, kdtB; pantetheine-phosphate adenylyltransferase [EC:2.7.7.3]
K01267	0.00481475	0.129973	0.152235	0.0338335	cysNC; bifunctional enzyme CysN/CysC [EC:2.7.7.4 2.7.1.25]
K01270	0.00825363	0.148784	0.119184	0.0158723	cysN; sulfate adenylyltransferase subunit 1 [EC:2.7.7.4]
K01271	0.18871	0.110768	0.122683	0.17392	cysD; sulfate adenylyltransferase subunit 2 [EC:2.7.7.4]
K01273	0.00868209	0.0805911	0.105415	0.0360567	sat, met3; sulfate adenylyltransferase [EC:2.7.7.4]
K01277	0.00273095	0.00347475	0	0.0104659	pnp, PNPT1; polyribonucleotide nucleotidyltransferase [EC:2.7.7.8]
K01278	0.139958	0.027629	0.000229213	0.148679	UGP2, galU, galF; UTP--glucose-1-phosphate uridylyltransferase [EC:2.7.7.9]
K01281	0.185354	0.0712462	0.0197894	0.167135	galT, GALT; UDPglucose--hexose-1-phosphate uridylyltransferase [EC:2.7.7.12]
K01284	0.00389322	0.00518192	0.016467	0.0137756	GMPP; mannose-1-phosphate guanylyltransferase [EC:2.7.7.13]
K01295	0.000991893	0.0457681	0.0169436	0.00432439	nadD; nicotinate-nucleotide adenylyltransferase [EC:2.7.7.18]
K01297	0.00309158	0.0723399	0.13988	0.0444786	pcnB; poly(A) polymerase [EC:2.7.7.19]
K01299	0.0789757	0.0723239	0.050822	0.00174532	manC, cpsB; mannose-1-phosphate guanylyltransferase [EC:2.7.7.13]
K01304	0.0407318	0.0415033	0.0113278	0.0345014	rfbA, rmlA, rffH; glucose-1-phosphate thymidylyltransferase [EC:2.7.7.24]
K01305	0.00284511	0.086472	0.0859015	0.0268221	cca; tRNA nucleotidyltransferase (CCA-adding enzyme) [EC:2.7.7.72 3.1.3.- 3.1.4.-]
K01308	0.00292383	0.0249452	0.0799076	0.0278882	glgC; glucose-1-phosphate adenylyltransferase [EC:2.7.7.27]
K01338	0.0529415	0.473018	0.47866	0.216428	rfbF; glucose-1-phosphate cytidylyltransferase [EC:2.7.7.33]
K01354	0.133556	0.0197223	0.0176184	0.108625	kdsB; 3-deoxy-manno-octulosonate cytidylyltransferase (CMP-KDO synthetase) [EC:2.7.7.38]
K01356	0.144233	0.089226	0.117407	0.141321	tagD; glycerol-3-phosphate cytidylyltransferase [EC:2.7.7.39]
K01358	0.16582	0.11377	0.116036	0.161453	E2.7.7.41, CDS1, CDS2, cdsA; phosphatidate cytidylyltransferase [EC:2.7.7.41]
K01361	0.0212253	0.402911	0.259783	0.0339538	glnE; [glutamine synthetase] adenylyltransferase / [glutamine synthetase]-adenylyl-L-tyrosine phosphorylase [EC:2.7.7.42 2.7.7.89]
K01372	0.316157	0.0603542	0.00133473	0.258421	ltrA; RNA-directed DNA polymerase [EC:2.7.7.49]
K01395	6.76117e-05	0	0	0	rph; ribonuclease PH [EC:2.7.7.56]
K01409	0.170426	0.166359	0.15249	0.142081	glnD; [protein-PII] uridylyltransferase [EC:2.7.7.59]
K01414	7.27377e-05	0.016243	0.0199386	0.00109694	ispD; 2-C-methyl-D-erythritol 4-phosphate cytidylyltransferase [EC:2.7.7.60]
K01419	0.0256977	0.00843743	0.00720981	0.0345469	pgsA, PGS1; CDP-diacylglycerol---glycerol-3-phosphate 3-phosphatidyltransferase [EC:2.7.8.5]
K01420	0.00185098	0.0582775	0.0402225	0.00140014	acpS; holo-[acyl-carrier protein] synthase [EC:2.7.8.7]
K01421	1.03113	0.38755	0.435532	0.77886	mraY; phospho-N-acetylmuramoyl-pentapeptide-transferase [EC:2.7.8.13]
K01424	0.12461	0.158678	0.0780562	0.090584	tagT_U_V; polyisoprenyl-teichoic acid--peptidoglycan teichoic acid transferase [EC:2.7.8.-]
K01425	0.0322219	0.0725717	0.0558079	0.010858	ppdK; pyruvate, orthophosphate dikinase [EC:2.7.9.1]
K01426	0.235368	0.128451	0.0513169	0.269031	pps, ppsA; pyruvate, water dikinase [EC:2.7.9.2]
K01427	0.000325773	0	0	0	selD, SEPHS; selenide, water dikinase [EC:2.7.9.3]
K01428	0.0272861	0.0424961	0.0603759	0.0769677	bioB; biotin synthase [EC:2.8.1.6]
K01429	0.000751947	0.008038	0.000926631	0.000437117	assT; arylsulfate sulfotransferase [EC:2.8.2.22]
K01430	0.000769316	0.00643972	0.00995252	0.00487869	pct; propionate CoA-transferase [EC:2.8.3.1]
K01431	0.0316305	0.00339466	0	0.0295086	atoD; acetate CoA/acetoacetate CoA-transferase alpha subunit [EC:2.8.3.8 2.8.3.9]
K01433	0.00160455	0.00210549	0.00829587	0.00512193	selA; L-seryl-tRNA(Ser) seleniumtransferase [EC:2.9.1.1]
K01438	0.00238391	0.00278133	0.0287046	0.00738206	lip, TGL2; triacylglycerol lipase [EC:3.1.1.3]
K01439	0.277111	0.157232	0.212312	0.31577	PLA2G, SPLA2; secretory phospholipase A2 [EC:3.1.1.4]
K01442	0.00031586	0.04108	0.0110353	0	pldB; lysophospholipase [EC:3.1.1.5]
K01443	0.152417	0.188972	0.118593	0.113455	E3.1.1.11; pectinesterase [EC:3.1.1.11]
K01448	0.136535	0.428148	0.367876	0.121342	PTH1, pth, spoVC; peptidyl-tRNA hydrolase, PTH1 family [EC:3.1.1.29]
K01449	0.00262203	0.0524403	0.129176	0.0393381	PGLS, pgl, devB; 6-phosphogluconolactonase [EC:3.1.1.31]
K01457	0.0489973	0.0071902	0.0491175	0.0408852	AOAH; acyloxyacyl hydrolase [EC:3.1.1.77]
K01458	0.00774862	0.00394792	0	0.0188139	gloB, gloC, HAGH; hydroxyacylglutathione hydrolase [EC:3.1.2.6]
K01462	0.128756	0.129858	0.131846	0.116865	MCH; medium-chain acyl-[acyl-carrier-protein] hydrolase [EC:3.1.2.21]
K01464	0.00349251	0.152729	0.218694	0.0599141	E3.1.3.1, phoA, phoB; alkaline phosphatase [EC:3.1.3.1]
K01465	0.210959	0.163985	0.155443	0.194874	serB, PSPH; phosphoserine phosphatase [EC:3.1.3.3]
K01466	0.0314833	0.049936	0.0644782	0.0916798	E3.1.3.5; 5'-nucleotidase [EC:3.1.3.5]
K01468	0.0873768	0.054312	0.0347111	0.106985	agp; glucose-1-phosphatase [EC:3.1.3.10]
K01470	0.000595754	0.0239301	0.0401526	0.0124262	hisB; imidazoleglycerol-phosphate dehydratase / histidinol-phosphatase [EC:4.2.1.19 3.1.3.15]
K01473	7.18904e-05	0.0138488	0.0128461	0.000155602	gph; phosphoglycolate phosphatase [EC:3.1.3.18]
K01474	5.37589e-05	0.0125851	0.00905696	0.0001453	E3.1.3.25, IMPA, suhB; myo-inositol-1(or 4)-monophosphatase [EC:3.1.3.25]
K01476	0.00317241	0.0563581	0.0366997	0.00388376	pgpA; phosphatidylglycerophosphatase A [EC:3.1.3.27]
K01478	0.0657422	0.0469833	0.0236034	0.0840466	E3.1.3.41; 4-nitrophenyl phosphatase [EC:3.1.3.41]
K01480	0.00201268	0.0443655	0.0600353	0.0149157	E3.1.3.48; protein-tyrosine phosphatase [EC:3.1.3.48]
K01482	0.00543393	0.0108137	0.00629062	0.0027635	plc; phospholipase C [EC:3.1.4.3]
K01485	0.111736	0.0429673	0.0139049	0.189509	acpD, azoR; FMN-dependent NADH-azoreductase [EC:1.7.1.17]
K01486	0.185786	0.210456	0.333594	0.164055	cpdB; 2',3'-cyclic-nucleotide 2'-phosphodiesterase / 3'-nucleotidase [EC:3.1.4.16 3.1.3.6]
K01487	0.035399	0.0935343	0.116293	0.105467	E3.1.4.46, glpQ, ugpQ; glycerophosphoryl diester phosphodiesterase [EC:3.1.4.46]
K01488	0.0694758	0.073246	0.100156	0.0762398	dgt; dGTPase [EC:3.1.5.1]
K01489	0.0283614	0.0577121	0.0603738	0.0165727	E3.1.6.1, aslA; arylsulfatase [EC:3.1.6.1]
K01491	0.14159	0.108044	0.11602	0.12552	E3.1.11.2, xthA; exodeoxyribonuclease III [EC:3.1.11.2]
K01493	0.0566807	0.0596801	0.0539851	0.0735328	nfo; deoxyribonuclease IV [EC:3.1.21.2]
K01494	0.0354804	0.0343803	0.0174771	0.0406512	hsdR; type I restriction enzyme, R subunit [EC:3.1.21.3]
K01495	0.0581133	0.0560126	0.0379083	0.0709483	hsdS; type I restriction enzyme, S subunit [EC:3.1.21.3]
K01496	0.0220815	0.00569403	0.000510278	0.0189147	E3.1.21.4; type II restriction enzyme [EC:3.1.21.4]
K01501	0.00522334	0.0125227	0.00290876	0.00238941	res; type III restriction enzyme [EC:3.1.21.5]
K01507	0.0511444	0.00937122	0.00760222	0.0438527	ruvC; crossover junction endodeoxyribonuclease RuvC [EC:3.1.22.4]
K01512	0.0322752	0.0214567	0.0225647	0.0329423	K01163; uncharacterized protein
K01515	0.0937087	0.0889624	0.0776963	0.105897	ENDOG; endonuclease G, mitochondrial
K01520	0.109197	0.0709654	0.0702065	0.159166	nuc; micrococcal nuclease [EC:3.1.31.1]
K01523	0.013495	0.00824345	0.00207565	0.0108058	AMY, amyA, malS; alpha-amylase [EC:3.2.1.1]
K01524	0.483277	0.18079	0.32435	0.399803	E3.2.1.4; endoglucanase [EC:3.2.1.4]
K01528	9.03184e-05	0	0.00208634	0.00027708	E3.2.1.8, xynA; endo-1,4-beta-xylanase [EC:3.2.1.8]
K01530	0.00395304	0	0	0.000638077	IMA, malL; oligo-1,6-glucosidase [EC:3.2.1.10]
K01531	0.0424245	0.244059	0.149991	0.0916024	E3.2.1.14; chitinase [EC:3.2.1.14]
K01533	0.540007	0.0774827	0.0123484	0.161535	malZ; alpha-glucosidase [EC:3.2.1.20]
K01534	0.918623	0.482588	0.311972	0.778997	lacZ; beta-galactosidase [EC:3.2.1.23]
K01535	0.00827409	0.00821174	0	0.0116458	MAN2C1; alpha-mannosidase [EC:3.2.1.24]
K01537	0.387794	0.873046	0.806513	0.472728	E3.2.1.25, MANBA, manB; beta-mannosidase [EC:3.2.1.25]
K01546	0.0193042	0.115222	0.0602067	0.0293324	INV, sacA; beta-fructofuranosidase [EC:3.2.1.26]
K01547	0.0233891	0.135447	0.0806931	0.0373358	TREH, treA, treF; alpha,alpha-trehalase [EC:3.2.1.28]
K01548	0.00739687	0.0399782	0.020177	0.010675	uidA, GUSB; beta-glucuronidase [EC:3.2.1.31]
K01551	0.356278	0.248198	0.234439	0.57657	xynB; xylan 1,4-beta-xylosidase [EC:3.2.1.37]
K01560	0.0892626	0.0658653	0.0501349	0.100041	pulA; pullulanase [EC:3.2.1.41]
K01567	0.00262457	0.0828225	0.0937624	0.0199854	GBA, srfJ; glucosylceramidase [EC:3.2.1.45]
K01571	0.00491261	0.0604462	0.0677539	0.00750755	NAGLU; alpha-N-acetylglucosaminidase [EC:3.2.1.50]
K01574	7.06195e-05	0.009481	0.0206995	0.0107464	FUCA; alpha-L-fucosidase [EC:3.2.1.51]
K01575	0.0955453	0.016382	0.0384045	0.0899131	nagZ; beta-N-acetylhexosaminidase [EC:3.2.1.52]
K01579	0.00200463	0.019015	0.0216788	0.00822689	cd, ma, nplT; cyclomaltodextrinase / maltogenic alpha-amylase / neopullulanase [EC:3.2.1.54 3.2.1.133 3.2.1.135]
K01580	0.0045959	0.0871048	0.0651133	0.0058357	abfA; alpha-L-arabinofuranosidase [EC:3.2.1.55]
K01581	0.115919	0.0875991	0.0735778	0.115424	E3.2.1.58; glucan 1,3-beta-glucosidase [EC:3.2.1.58]
K01585	0.00468249	0.0420458	0.132633	0.046126	sacC, levB; levanase [EC:3.2.1.65]
K01586	0.224556	0.200572	0.201425	0.206559	ISA, treX; isoamylase [EC:3.2.1.68]
K01588	0.0767642	0.0602557	0.0575738	0.0677071	dexB; glucan 1,6-alpha-glucosidase [EC:3.2.1.70]
K01589	0.247716	0.0556243	0.0144073	0.20941	gmuG; mannan endo-1,4-beta-mannosidase [EC:3.2.1.78]
K01591	0.1747	0.112532	0.0967635	0.156354	E3.2.1.85, lacG; 6-phospho-beta-galactosidase [EC:3.2.1.85]
K02342	0.162492	0.0730527	0.0621394	0.134753	E3.2.1.86A, celF; 6-phospho-beta-glucosidase [EC:3.2.1.86]
K02343	0.357933	0.244763	0.281591	0.407176	E3.2.1.86B, bglA; 6-phospho-beta-glucosidase [EC:3.2.1.86]
K02346	0.193967	0.153259	0.133638	0.152289	E3.2.1.89; arabinogalactan endo-1,4-beta-galactosidase [EC:3.2.1.89]
K02348	0.0197236	0.0475845	0.0329646	0.0386916	treC; trehalose-6-phosphate hydrolase [EC:3.2.1.93]
K02355	0.382846	0.517501	0.399493	0.328294	glvA; maltose-6'-phosphate glucosidase [EC:3.2.1.122]
K02356	0.117344	0.0769596	0.0768239	0.109769	aguA; alpha-glucuronidase [EC:3.2.1.139]
K02357	0.142393	0.112803	0.108892	0.128617	iunH; purine nucleosidase [EC:3.2.2.1]
K02358	0.196447	0.288448	0.295748	0.201675	mtnN, mtn, pfs; adenosylhomocysteine nucleosidase [EC:3.2.2.9]
K02361	0.00172817	0.00260715	0.0096305	0.00657536	tag; DNA-3-methyladenine glycosylase I [EC:3.2.2.20]
K02371	0.0956863	0.100251	0.100611	0.0714107	alkA; DNA-3-methyladenine glycosylase II [EC:3.2.2.21]
K02372	0.103363	0.0634948	0.056606	0.0748613	rihA; pyrimidine-specific ribonucleoside hydrolase [EC:3.2.-.-]
K02377	0.0387486	0.00770375	0.00710111	0.0470984	E3.3.1.1, ahcY; adenosylhomocysteinase [EC:3.3.1.1]
K02381	0.00247982	0.000844021	0.0230414	0.00270741	pepN; aminopeptidase N [EC:3.4.11.2]
K02385	0.0105073	0.0135415	0.0161419	0.0141394	pepT; tripeptide aminopeptidase [EC:3.4.11.4]
K02387	0.0209013	0.0388661	0.0442359	0.0265987	pip; proline iminopeptidase [EC:3.4.11.5]
K02388	0.0219404	0.0372416	0.0443282	0.0286471	pepA; glutamyl aminopeptidase [EC:3.4.11.7]
K02389	0.0135673	0.0424197	0.0736934	0.023589	pepP; Xaa-Pro aminopeptidase [EC:3.4.11.9]
K02390	0.0448965	0.139164	0.123098	0.0585335	map; methionyl aminopeptidase [EC:3.4.11.18]
K02392	0.0726911	0.140212	0.165509	0.0982648	dmpA, dap; D-aminopeptidase [EC:3.4.11.19]
K02396	0.0753041	0.149387	0.190834	0.108592	DNPEP; aspartyl aminopeptidase [EC:3.4.11.21]
K02397	0.0466174	0.0793803	0.119372	0.0626739	pepD; dipeptidase D [EC:3.4.13.-]
K02400	0.112632	0.198608	0.243388	0.144926	pepQ; Xaa-Pro dipeptidase [EC:3.4.13.9]
K02401	0.0562238	0.144427	0.187628	0.0870575	DPEP; membrane dipeptidase [EC:3.4.13.19]
K02404	0.00350882	0.0815343	0.0783741	0.0272242	DPP3; dipeptidyl-peptidase III [EC:3.4.14.4]
K02405	0.0401882	0.0709417	0.0937414	0.0506714	DPP4, CD26; dipeptidyl-peptidase 4 [EC:3.4.14.5]
K02406	0.046912	0.211467	0.294556	0.118121	pepX; X-Pro dipeptidyl-peptidase [EC:3.4.14.11]
K02407	0.0712077	0.171954	0.224199	0.117262	dcp; peptidyl-dipeptidase Dcp [EC:3.4.15.5]
K02408	0.014903	0.0176619	0.0327343	0.0215071	cpg; glutamate carboxypeptidase [EC:3.4.17.11]
K02409	0.0822764	0.146293	0.169653	0.105832	ldcA; muramoyltetrapeptide carboxypeptidase [EC:3.4.17.13]
K02410	0.0520045	0.0971751	0.108463	0.068332	E3.4.17.19; carboxypeptidase Taq [EC:3.4.17.19]
K02411	0.00190393	0.0492041	0.0341044	0.00651276	pcp; pyroglutamyl-peptidase [EC:3.4.19.3]
K02412	0.0671963	0.116816	0.135479	0.0876227	iadA; beta-aspartyl-dipeptidase (metallo-type) [EC:3.4.19.-]
K02413	0.0112555	0.00217368	0.00967125	0.0115611	yqgT; g-D-glutamyl-meso-diaminopimelate peptidase [EC:3.4.19.11]
K02416	0.0568932	0.109209	0.118694	0.0722023	lon; ATP-dependent Lon protease [EC:3.4.21.53]
K02417	0.0611186	0.0938026	0.102245	0.0790278	ptrB; oligopeptidase B [EC:3.4.21.83]
K02419	0.0423232	0.0712907	0.0836989	0.0562513	lexA; repressor LexA [EC:3.4.21.88]
K02420	0.0129387	0.0239242	0.0279943	0.016431	clpP, CLPP; ATP-dependent Clp protease, protease subunit [EC:3.4.21.92]
K02421	0.035954	0.0197159	0.0178798	0.0320051	E3.4.21.96; lactocepin [EC:3.4.21.96]
K02422	0.0196892	0.0341268	0.0369746	0.0215037	BLMH, pepC; bleomycin hydrolase [EC:3.4.22.40]
K02424	0.0954737	0.0202785	0.00977455	0.124508	MEP1A; meprin A [EC:3.4.24.18]
K02426	0.0010468	0.00119518	0.00732635	0.00386359	KAE1, tsaD, QRI7; N6-L-threonylcarbamoyladenine synthase [EC:2.3.1.234]
K02428	0.150113	0.083308	0.0675649	0.106655	prlC; oligopeptidase A [EC:3.4.24.70]
K02429	0.138397	0.0271043	0.0180667	0.101693	hslV, clpQ; ATP-dependent HslUV protease, peptidase subunit HslV [EC:3.4.25.2]
K02433	0.388237	0.175291	0.138887	0.319281	fnr; CRP/FNR family transcriptional regulator, anaerobic regulatory protein
K02434	0.240587	0.154029	0.134098	0.209344	yhgE; putative membrane protein
K02435	0.0604079	0.0259659	0.0245185	0.0421008	E3.5.1.1, ansA, ansB; L-asparaginase [EC:3.5.1.1]
K02437	0.0292755	0.0214264	0.0285416	0.0308697	glsA, GLS; glutaminase [EC:3.5.1.2]
K02440	0.167995	0.106896	0.090524	0.170245	E3.5.1.4, amiE; amidase [EC:3.5.1.4]
K02443	0.0028308	0.0599806	0.0539895	0.0137073	URE; urease [EC:3.5.1.5]
K02444	0.00300177	0.00251605	0.00695492	0.00457578	ureC; urease subunit alpha [EC:3.5.1.5]
K02445	0.0561801	0.0274697	0.0206708	0.00119524	ureB; urease subunit beta [EC:3.5.1.5]
K02446	0.000325095	0.0262856	0.0430994	0.000585351	ureA; urease subunit gamma [EC:3.5.1.5]
K02456	0.000185636	0	0.00790865	0	UPB1, pydC; beta-ureidopropionase [EC:3.5.1.6]
K02469	0.674959	0.607899	0.593161	0.736884	purU; formyltetrahydrofolate deformylase [EC:3.5.1.10]
K02470	0.541956	0.451457	0.475395	0.631886	argE; acetylornithine deacetylase [EC:3.5.1.16]
K02477	0.00293399	0.052546	0.121303	0.0423877	dapE; succinyl-diaminopimelate desuccinylase [EC:3.5.1.18]
K02478	0.00335436	0.0897332	0.119496	0.0237631	E3.5.1.24; choloylglycine hydrolase [EC:3.5.1.24]
K02481	0.00209605	0.00302938	0	0.00754253	nagA, AMDHD2; N-acetylglucosamine-6-phosphate deacetylase [EC:3.5.1.25]
K02483	0.0373255	0.0144177	0.00892717	0.0299629	amiABC; N-acetylmuramoyl-L-alanine amidase [EC:3.5.1.28]
K02484	0.106492	0.046531	0.0173914	0.0808889	cwlJ, sleB; N-acetylmuramoyl-L-alanine amidase [EC:3.5.1.28]
K02492	0.0151335	0.113724	0.14422	0.0584738	atzF; allophanate hydrolase [EC:3.5.1.54]
K02493	0.147425	0.0700194	0.104905	0.13778	hutG; N-formylglutamate deformylase [EC:3.5.1.68]
K02495	0.0020447	0.015661	0.0161962	0.0088624	PDF, def; peptide deformylase [EC:3.5.1.88]
K02499	0.00507952	0.151728	0.153019	0.0380421	DPYS, dht, hydA; dihydropyrimidinase [EC:3.5.2.2]
K02500	0.125929	0.0713983	0.0730701	0.104755	URA4, pyrC; dihydroorotase [EC:3.5.2.3]
K02501	0.104398	0.0618166	0.0567479	0.0856851	allB; allantoinase [EC:3.5.2.5]
K02502	0.0667453	0.0895527	0.0987674	0.103163	hutI, AMDHD1; imidazolonepropionase [EC:3.5.2.7]
K02503	0.0740236	0.0494963	0.0493828	0.067373	E3.5.2.10; creatinine amidohydrolase [EC:3.5.2.10]
K02517	0.00291378	0.0238399	0.0146802	0.0099368	hyuA; N-methylhydantoinase A [EC:3.5.2.14]
K02518	0.0409222	0.031798	0.0271032	0.0344532	hyuB; N-methylhydantoinase B [EC:3.5.2.14]
K02519	0.411469	0.293032	0.263827	0.352901	E3.5.3.1, rocF, arg; arginase [EC:3.5.3.1]
K02520	0.0997242	0.0677689	0.0873185	0.0978992	arcA; arginine deiminase [EC:3.5.3.6]
K02523	0.00609399	0.0264927	0.0102524	0.0157473	speB; agmatinase [EC:3.5.3.11]
K02525	0.0709266	0.0320533	0.00987866	0.0243993	DDAH, ddaH; dimethylargininase [EC:3.5.3.18]
K02526	0.00418841	0.053855	0.0518033	0.00590037	codA; cytosine/creatinine deaminase [EC:3.5.4.1 3.5.4.21]
K02527	0.00270629	0.0169061	0.0171519	0.0105636	ade; adenine deaminase [EC:3.5.4.2]
K02528	0.162245	0.12345	0.109592	0.145265	E3.5.4.3, guaD; guanine deaminase [EC:3.5.4.3]
K02529	0.920305	0.832378	0.620759	0.832216	add, ADA; adenosine deaminase [EC:3.5.4.4]
K02530	0.0125599	0.0255108	0.00596432	0.00849753	cdd, CDA; cytidine deaminase [EC:3.5.4.5]
K02532	0.0534551	0.0235535	0.0231806	0.0769464	folD; methylenetetrahydrofolate dehydrogenase (NADP+) / methenyltetrahydrofolate cyclohydrolase [EC:1.5.1.5 3.5.4.9]
K02535	0.000271294	0.0114993	0.0122242	0.00102082	comEB; dCMP deaminase [EC:3.5.4.12]
K02536	0.00203958	0.0409011	0.0212634	0.00780738	dcd; dCTP deaminase [EC:3.5.4.13]
K02538	0.0321395	0.0348652	0.081227	0.0504393	GCH1, folE; GTP cyclohydrolase IA [EC:3.5.4.16]
K02548	0.168215	0.0888569	0.0147516	0.134509	hisI; phosphoribosyl-AMP cyclohydrolase [EC:3.5.4.19]
K02549	0.36724	0.0369574	0.0160205	0.0586862	E3.5.5.1; nitrilase [EC:3.5.5.1]
K02551	0.159568	0.0267602	0.0187927	0.0841008	ppa; inorganic pyrophosphatase [EC:3.6.1.1]
K02552	0.121647	0.0161601	0.0125677	0.0577678	acyP; acylphosphatase [EC:3.6.1.7]
K02556	0.0426221	0.131253	0.129785	0.0527345	nudF; ADP-ribose pyrophosphatase [EC:3.6.1.13]
K02557	0.0447745	0.126474	0.131312	0.0607727	dut, DUT; dUTP pyrophosphatase [EC:3.6.1.23]
K02563	0.184483	0.141064	0.129022	0.154241	hisE; phosphoribosyl-ATP pyrophosphohydrolase [EC:3.6.1.31]
K02564	0.0912351	0.0757835	0.0561473	0.0625424	ppx-gppA; exopolyphosphatase / guanosine-5'-triphosphate,3'-diphosphate pyrophosphatase [EC:3.6.1.11 3.6.1.40]
K02566	0.0446194	0.0104425	0.00718393	0.0351352	DNM1_3; dynamin 1/3 [EC:3.6.5.5]
K02575	0.000341829	0.00836736	0.0853022	0.026997	E7.6.2.1; phospholipid-translocating ATPase [EC:7.6.2.1]
K02585	0.000399528	0.0119639	0.0935322	0.0425656	mgtA, mgtB; P-type Mg2+ transporter [EC:7.2.2.14]
K02586	0.0048486	0.106955	0.432032	0.193204	copB; P-type Cu2+ transporter [EC:7.2.2.9]
K02587	0.0034354	0.0674492	0.10183	0.0323352	zntA; Zn2+/Cd2+-exporting ATPase [EC:7.2.2.12 7.2.2.21]
K02588	0.00260733	0.0475837	0.142146	0.0425792	PMA1, PMA2; H+-transporting ATPase [EC:7.1.2.1]
K02589	0.00235984	0.0252526	0.0317011	0.0128009	ATP2C; P-type Ca2+ transporter type 2C [EC:7.2.2.10]
K02590	0.00277488	0.0235913	0.0372822	0.0162035	kdpA; potassium-transporting ATPase potassium-binding subunit
K02591	0.00410792	0.097883	0.436337	0.187901	kdpB; potassium-transporting ATPase ATP-binding subunit [EC:7.2.2.6]
K02594	0.00764728	0.122387	0.141455	0.0479765	kdpC; potassium-transporting ATPase KdpC subunit
K02598	0.00345239	0.0985062	0.0509327	0	arsA, ASNA1, GET3; arsenite/tail-anchored protein-transporting ATPase [EC:7.3.2.7 7.3.-.-]
K02600	0.178385	0.144063	0.132262	0.164988	E3.8.1.2; 2-haloacid dehalogenase [EC:3.8.1.2]
K02601	0.117816	0.0813367	0.0681437	0.10106	pdaA; peptidoglycan-N-acetylmuramic acid deacetylase [EC:3.5.1.-]
K02604	0.0130966	0.000516557	0	0.00026921	oadA; oxaloacetate decarboxylase (Na+ extruding) subunit alpha [EC:7.2.4.2]
K02619	0.0512799	0.0393749	0.0180578	0.0450048	adc; acetoacetate decarboxylase [EC:4.1.1.4]
K02621	0.255623	0.093777	0.0331986	0.183509	alsD, budA, aldC; acetolactate decarboxylase [EC:4.1.1.5]
K02622	0.202158	0.0532752	0.0215902	0.149184	panD; aspartate 1-decarboxylase [EC:4.1.1.11]
K02647	0.0049035	0.116052	0.0917112	0.00230985	E4.1.1.15, gadB, gadA, GAD; glutamate decarboxylase [EC:4.1.1.15]
K02652	0.0198707	0.226397	0.156889	0.136577	E4.1.1.17, ODC1, speC, speF; ornithine decarboxylase [EC:4.1.1.17]
K02653	0.0143019	0.147492	0.13763	0.111342	speA; arginine decarboxylase [EC:4.1.1.19]
K02654	0.0654358	0.0626867	0.0645253	0.0918817	lysA; diaminopimelate decarboxylase [EC:4.1.1.20]
K02662	0.0102299	0.0716575	0.0179799	0.0652547	purE; 5-(carboxyamino)imidazole ribonucleotide mutase [EC:5.4.99.18]
K02666	0.000329755	0.00560149	0.00470599	0.000827948	purK; 5-(carboxyamino)imidazole ribonucleotide synthase [EC:6.3.4.18]
K02669	0.0248213	0.0997508	0.125989	0.200713	pyrF; orotidine-5'-phosphate decarboxylase [EC:4.1.1.23]
K02687	0.0940157	0.136604	0.115209	0.08904	ppc; phosphoenolpyruvate carboxylase [EC:4.1.1.31]
K02740	1.10144e-05	0	0	0	E4.1.1.32, pckA, PCK; phosphoenolpyruvate carboxykinase (GTP) [EC:4.1.1.32]
K02744	0.0166374	0.0416442	0.0252068	0.00461155	MVD, mvaD; diphosphomevalonate decarboxylase [EC:4.1.1.33]
K02745	0.00154973	0.0479475	0.0151058	0.000120833	hemE, UROD; uroporphyrinogen decarboxylase [EC:4.1.1.37]
K02746	0.00235425	0.0804303	0.0241976	0.000152168	rbcL; ribulose-bisphosphate carboxylase large chain [EC:4.1.1.39]
K02747	0.00177443	0.08488	0.0256595	0.000135571	mmdA; methylmalonyl-CoA decarboxylase subunit alpha [EC:7.2.4.3]
K02750	0.00395478	0.129717	0.070177	0.000413437	pcaC; 4-carboxymuconolactone decarboxylase [EC:4.1.1.44]
K02757	0.614446	0.327294	0.309466	0.529851	trpC; indole-3-glycerol phosphate synthase [EC:4.1.1.48]
K02759	0.0347291	0.140309	0.0616682	0.0177036	E4.1.1.49, pckA; phosphoenolpyruvate carboxykinase (ATP) [EC:4.1.1.49]
K02760	0.0312611	0.130724	0.0637666	0.0150941	speD, AMD1; S-adenosylmethionine decarboxylase [EC:4.1.1.50]
K02761	0.259981	0.613115	0.268184	0.136546	psd, PISD; phosphatidylserine decarboxylase [EC:4.1.1.65]
K02768	0.0156256	0.00849027	0.01885	0.0191255	deoC, DERA; deoxyribose-phosphate aldolase [EC:4.1.2.4]
K02769	0.00830772	0.00189693	0.00855228	0.0119156	ltaE; threonine aldolase [EC:4.1.2.48]
K02770	0.178134	0.272474	0.309863	0.2336	xfp, xpk; xylulose-5-phosphate/fructose-6-phosphate phosphoketolase [EC:4.1.2.9 4.1.2.22]
K02773	0.00748524	0.0277039	0.0457262	0.0154539	ALDO; fructose-bisphosphate aldolase, class I [EC:4.1.2.13]
K02774	0.00551468	0.0193937	0.0249663	0.0101506	FBA, fbaA; fructose-bisphosphate aldolase, class II [EC:4.1.2.13]
K02775	0.038052	0.0980123	0.117583	0.0782817	eda; 2-dehydro-3-deoxyphosphogluconate aldolase / (4S)-4-hydroxy-2-oxoglutarate aldolase [EC:4.1.2.14 4.1.3.42]
K02777	0.0297407	0.067925	0.0493356	0.0320596	E2.5.1.54, aroF, aroG, aroH; 3-deoxy-7-phosphoheptulonate synthase [EC:2.5.1.54]
K02781	0.0188703	0.0125453	0.0102752	0.019914	kdsA; 2-dehydro-3-deoxyphosphooctonate aldolase (KDO 8-P synthase) [EC:2.5.1.55]
K02782	0.0474359	0.0278069	0.0251627	0.0484249	fucA; L-fuculose-phosphate aldolase [EC:4.1.2.17]
K02783	0.0271882	0.0168967	0.0142687	0.0276205	rhaD; rhamnulose-1-phosphate aldolase [EC:4.1.2.19]
K02784	0.0609937	0.034114	0.0461245	0.0452693	folB; 7,8-dihydroneopterin aldolase/epimerase/oxygenase [EC:4.1.2.25 5.1.99.8 1.13.11.81]
K02786	0.00125713	0.00029632	0.00103013	0.00148484	lacD; tagatose 1,6-diphosphate aldolase [EC:4.1.2.40]
K02788	0.0101485	0.00135546	0.0075791	0.00871273	E4.1.3.3, nanA, NPL; N-acetylneuraminate lyase [EC:4.1.3.3]
K02791	0.00497031	0.156996	0.129467	0.00747335	E2.3.3.10; hydroxymethylglutaryl-CoA synthase [EC:2.3.3.10]
K02793	0.0437831	0.0407768	0.0119276	0.045672	citF; citrate lyase subunit alpha / citrate CoA-transferase [EC:2.8.3.10]
K02794	0.160779	0.102116	0.0212685	0.11422	citE; citrate lyase subunit beta / citryl-CoA lyase [EC:4.1.3.34]
K02795	0.242113	0.18037	0.0970738	0.213685	citD; citrate lyase subunit gamma (acyl carrier protein)
K02796	0.252873	0.15264	0.0833696	0.181193	CS, gltA; citrate synthase [EC:2.3.3.1]
K02798	0.0224436	0.0128417	0.0404792	0.035452	leuA, IMS; 2-isopropylmalate synthase [EC:2.3.3.13]
K02800	0.0988585	0.102378	0.198634	0.138654	E2.2.1.6L, ilvB, ilvG, ilvI; acetolactate synthase I/II/III large subunit [EC:2.2.1.6]
K02804	0.00344756	0.132567	0.0647014	0.00204701	E2.2.1.6S, ilvH, ilvN; acetolactate synthase I/III small subunit [EC:2.2.1.6]
K02806	0.00160688	0.00176924	0.00711069	0.00234326	trpE; anthranilate synthase component I [EC:4.1.3.27]
K02810	0.294005	0.22599	0.178326	0.281088	trpG; anthranilate synthase component II [EC:4.1.3.27]
K02813	0.026331	0.00572851	0	0.0243059	menB; naphthoate synthase [EC:4.1.3.36]
K02814	0.0381379	0.0091799	0	0.038056	dxs; 1-deoxy-D-xylulose-5-phosphate synthase [EC:2.2.1.7]
K02815	0.0430144	0.00947155	0	0.0388946	pabA; para-aminobenzoate synthetase component II [EC:2.6.1.85]
K02819	0.00296005	0.0615311	0.0478405	0	pabB; para-aminobenzoate synthetase component I [EC:2.6.1.85]
K02821	0.0651159	0.0206908	0.0134156	0.058691	phrB; deoxyribodipyrimidine photo-lyase [EC:4.1.99.3]
K02822	0.0424419	0.0294482	0.019767	0.0330316	cynT, can; carbonic anhydrase [EC:4.2.1.1]
K02823	0.0608044	0.0799775	0.0836185	0.0625763	cah; carbonic anhydrase [EC:4.2.1.1]
K02824	0.150103	0.16945	0.151116	0.124362	E4.2.1.2A, fumA, fumB; fumarate hydratase, class I [EC:4.2.1.2]
K02825	0.0588332	0.0561046	0.0498923	0.051499	E4.2.1.2AA, fumA; fumarate hydratase subunit alpha [EC:4.2.1.2]
K02834	0.0716746	0.0519737	0.0465917	0.0691171	E4.2.1.2AB, fumB; fumarate hydratase subunit beta [EC:4.2.1.2]
K02835	0.179457	0.151499	0.132609	0.15772	E4.2.1.2B, fumC, FH; fumarate hydratase, class II [EC:4.2.1.2]
K02836	0.188849	0.147985	0.128374	0.149672	ACO, acnA; aconitate hydratase [EC:4.2.1.3]
K02837	0.195196	0.198085	0.198531	0.16744	dgoD; galactonate dehydratase [EC:4.2.1.6]
K02838	0.088637	0.0673569	0.0637151	0.0784429	uxaA; altronate hydrolase [EC:4.2.1.7]
K02840	0.110333	0.014969	0.0133022	0.144447	uxuA; mannonate dehydratase [EC:4.2.1.8]
K02843	0.00305291	0.0135967	0.0141121	0.00963354	ilvD; dihydroxy-acid dehydratase [EC:4.2.1.9]
K02846	0.0233637	0.00604552	0.0101349	0.00046044	ENO, eno; enolase [EC:4.2.1.11]
K02851	0.12666	0.0272581	0.0780154	0.152605	hisB; imidazoleglycerol-phosphate dehydratase [EC:4.2.1.19]
K02856	0.00201001	0.00239069	0.0105794	0.00692105	trpA; tryptophan synthase alpha chain [EC:4.2.1.20]
K02859	0.014171	0.00362324	0	0.0165514	trpB; tryptophan synthase beta chain [EC:4.2.1.20]
K02860	0.0973892	0.0693849	0.0640042	0.0822474	CBS; cystathionine beta-synthase [EC:4.2.1.22]
K02863	0.122013	0.0935166	0.0915363	0.106235	hemB, ALAD; porphobilinogen synthase [EC:4.2.1.24]
K02864	0.0956533	0.0753218	0.0662637	0.0803099	pduC; propanediol dehydratase large subunit [EC:4.2.1.28]
K02867	0.0858524	0.0620695	0.0524806	0.0684975	leuC, IPMI-L; 3-isopropylmalate/(R)-2-methylmalate dehydratase large subunit [EC:4.2.1.33 4.2.1.35]
K02871	0.0781495	0.0606461	0.0537926	0.0676503	leuD, IPMI-S; 3-isopropylmalate/(R)-2-methylmalate dehydratase small subunit [EC:4.2.1.33 4.2.1.35]
K02874	0.0655153	0.0517728	0.0442381	0.0549308	gudD; glucarate dehydratase [EC:4.2.1.40]
K02876	0.0829286	0.0596197	0.0538333	0.0682036	rfbG; CDP-glucose 4,6-dehydratase [EC:4.2.1.45]
K02878	0.0715045	0.0581611	0.0527883	0.0613107	rfbB, rmlB, rffG; dTDP-glucose 4,6-dehydratase [EC:4.2.1.46]
K02879	0.0848095	0.0552761	0.0485446	0.0717436	gmd, GMDS; GDPmannose 4,6-dehydratase [EC:4.2.1.47]
K02881	0.0647748	0.0507186	0.047527	0.0542298	hutU, UROC1; urocanate hydratase [EC:4.2.1.49]
K02884	0.0597574	0.0438193	0.0433081	0.0529044	pheC; cyclohexadienyl dehydratase [EC:4.2.1.51 4.2.1.91]
K02886	0.150274	0.122945	0.1092	0.130894	dapA; 4-hydroxy-tetrahydrodipicolinate synthase [EC:4.3.3.7]
K02887	0.0659461	0.0505658	0.0441704	0.0546175	crt; enoyl-CoA hydratase [EC:4.2.1.17]
K02888	0.05017	0.0392513	0.0379825	0.0458301	hemD, UROS; uroporphyrinogen-III synthase [EC:4.2.1.75]
K02890	0.065621	0.048024	0.0429977	0.0532212	hysA, hylA, hylB; hyaluronate lyase [EC:4.2.2.1]
K02892	0.0526149	0.0422412	0.0391768	0.0458591	ogl; oligogalacturonide lyase [EC:4.2.2.6]
K02895	0.0585049	0.0444259	0.0386867	0.0503624	thrC; threonine synthase [EC:4.2.3.1]
K02897	0.0364817	0.0762493	0.0293042	0.0285232	mgsA; methylglyoxal synthase [EC:4.2.3.3]
K02899	0.0465679	0.0365539	0.0357471	0.0409214	aroB; 3-dehydroquinate synthase [EC:4.2.3.4]
K02902	0.0430099	0.0223975	0.0218782	0.0366566	aroC; chorismate synthase [EC:4.2.3.5]
K02904	0.0401579	0.0306304	0.028455	0.0332062	queD, ptpS, PTS; 6-pyruvoyltetrahydropterin/6-carboxytetrahydropterin synthase [EC:4.2.3.12 4.1.2.50]
K02906	0.114066	0.0901692	0.0823558	0.0991716	cysK; cysteine synthase [EC:2.5.1.47]
K02907	0.0317762	0.025521	0.0228465	0.0265419	metB; cystathionine gamma-synthase [EC:2.5.1.48]
K02909	0.0539169	0.0334265	0.0301336	0.045336	metY; O-acetylhomoserine (thiol)-lyase [EC:2.5.1.49]
K02911	0.0441172	0.0248803	0.0215868	0.0403945	aspA; aspartate ammonia-lyase [EC:4.3.1.1]
K02912	0.0106463	0	0	0	hutH, HAL; histidine ammonia-lyase [EC:4.3.1.3]
K02913	0.0569192	0.023932	0.00662669	0.0434896	hemC, HMBS; hydroxymethylbilane synthase [EC:2.5.1.61]
K02914	0.0191173	0.0191875	0.01674	0.0167162	E4.3.1.15; diaminopropionate ammonia-lyase [EC:4.3.1.15]
K02916	0.0330836	0.0274526	0.0246555	0.0289843	E4.3.1.17, sdaA, sdaB, tdcG; L-serine dehydratase [EC:4.3.1.17]
K02919	0.0260285	0.0167314	0.0139355	0.0186618	dsdA; D-serine dehydratase [EC:4.3.1.18]
K02926	0.119303	0.0904317	0.082032	0.101719	E4.3.1.19, ilvA, tdcB; threonine dehydratase [EC:4.3.1.19]
K02931	0.103067	0.0814366	0.0715551	0.0890423	argH, ASL; argininosuccinate lyase [EC:4.3.2.1]
K02933	0.099381	0.0850268	0.0731178	0.0831062	purB, ADSL; adenylosuccinate lyase [EC:4.3.2.2]
K02935	0.0689232	0.055471	0.049304	0.0591642	CTH; cystathionine gamma-lyase [EC:4.4.1.1]
K02939	0.0890311	0.0677716	0.0586842	0.0730398	GLO1, gloA; lactoylglutathione lyase [EC:4.4.1.5]
K02945	0.201242	0.0954033	0.0573052	0.160594	metC; cysteine-S-conjugate beta-lyase [EC:4.4.1.13]
K02946	0.0611623	0.0471863	0.042016	0.0537072	E4.4.1.11; methionine-gamma-lyase [EC:4.4.1.11]
K02948	0.0700898	0.0570392	0.0529252	0.0610335	ispF; 2-C-methyl-D-erythritol 2,4-cyclodiphosphate synthase [EC:4.6.1.12]
K02950	0.071067	0.0558687	0.0510919	0.0595365	hemH, FECH; protoporphyrin/coproporphyrin ferrochelatase [EC:4.99.1.1 4.99.1.9]
K02952	0.0666298	0.0530323	0.0504809	0.0551674	alr; alanine racemase [EC:5.1.1.1]
K02954	0.0641389	0.0297452	0.019599	0.0515476	murI; glutamate racemase [EC:5.1.1.3]
K02956	0.0450401	0.0346362	0.0337309	0.0436057	prdF; proline racemase [EC:5.1.1.4]
K02959	0.0662439	0.037842	0.0314842	0.0498521	dapF; diaminopimelate epimerase [EC:5.1.1.7]
K02960	0.000242063	0.000123911	0	0.000970601	racD; aspartate racemase [EC:5.1.1.13]
K02961	0.0514191	0.0399598	0.0334908	0.0427267	rpe, RPE; ribulose-phosphate 3-epimerase [EC:5.1.3.1]
K02963	0.0513545	0.0378614	0.034494	0.0405345	galE, GALE; UDP-glucose 4-epimerase [EC:5.1.3.2]
K02965	0.050704	0.0419885	0.0393053	0.0447932	galM, GALM; aldose 1-epimerase [EC:5.1.3.3]
K02967	0.129746	0.0941287	0.0824035	0.11472	RENBP; N-acylglucosamine 2-epimerase [EC:5.1.3.8]
K02968	0.0422073	0.0350174	0.0346577	0.0391743	nanE; N-acylglucosamine-6-phosphate 2-epimerase [EC:5.1.3.9]
K02970	0.0204399	0.0219343	0.0212069	0.0182042	rfbC, rmlC; dTDP-4-dehydrorhamnose 3,5-epimerase [EC:5.1.3.13]
K02982	0.124654	0.0975088	0.0870933	0.106048	wecB; UDP-N-acetylglucosamine 2-epimerase (non-hydrolysing) [EC:5.1.3.14]
K02985	0.000528439	0	0	0	nicE, maiA; maleate isomerase [EC:5.2.1.1]
K02986	0.103971	0.129613	0.112128	0.0981948	TPI, tpiA; triosephosphate isomerase (TIM) [EC:5.3.1.1]
K02988	0.100834	0.0704263	0.0633137	0.0871896	araA; L-arabinose isomerase [EC:5.3.1.4]
K02990	0.0584285	0.0436133	0.036369	0.0482913	xylA; xylose isomerase [EC:5.3.1.5]
K02992	0.0830068	0.0691525	0.0625308	0.0737419	rpiA; ribose 5-phosphate isomerase A [EC:5.3.1.6]
K02994	0.0743948	0.0608572	0.0545655	0.0625898	rpiB; ribose 5-phosphate isomerase B [EC:5.3.1.6]
K02996	0.0762868	0.0562024	0.0488979	0.0631228	manA, MPI; mannose-6-phosphate isomerase [EC:5.3.1.8]
K03014	7.11702e-06	0	0	0	GPI, pgi; glucose-6-phosphate isomerase [EC:5.3.1.9]
K03018	6.70186e-05	0.00218925	0.00263696	0	xylS, yicI; alpha-D-xyloside xylohydrolase [EC:3.2.1.177]
K03029	0.000184831	0	0	0	uxaC; glucuronate isomerase [EC:5.3.1.12]
K03038	0.0016284	0.000294095	0	0.00448829	rhaA; L-rhamnose isomerase [EC:5.3.1.14]
K03040	0.171383	0.147881	0.128435	0.149464	hisA; phosphoribosylformimino-5-aminoimidazole carboxamide ribotide isomerase [EC:5.3.1.16]
K03043	0.616512	0.567227	0.509619	0.537423	kduI; 4-deoxy-L-threo-5-hexosulose-uronate ketol-isomerase [EC:5.3.1.17]
K03046	0.66694	0.53927	0.471563	0.568529	trpF; phosphoribosylanthranilate isomerase [EC:5.3.1.24]
K03217	0.27541	0.169427	0.130579	0.20065	E5.3.1.26, lacA, lacB; galactose-6-phosphate isomerase [EC:5.3.1.26]
K03218	0.144253	0.119143	0.0992629	0.122522	praC, xylH; 4-oxalocrotonate tautomerase [EC:5.3.2.6]
K03642	0.0014725	0.008962	0.0102179	0.0061155	idi, IDI; isopentenyl-diphosphate Delta-isomerase [EC:5.3.3.2]
K03644	0.0325815	0.0139122	0.0581574	0.0631275	PGAM, gpmA; 2,3-bisphosphoglycerate-dependent phosphoglycerate mutase [EC:5.4.2.11]
K03647	0.108277	0.0173694	0.0049188	0.0884928	pgm; phosphoglucomutase [EC:5.4.2.2]
K03648	0.122022	0.0884565	0.0432917	0.120352	pgmB; beta-phosphoglucomutase [EC:5.4.2.6]
K03650	0.0966665	0.194083	0.183348	0.15035	deoB; phosphopentomutase [EC:5.4.2.7]
K03651	0.0660749	0.0115952	0.00714481	0.095753	manB; phosphomannomutase [EC:5.4.2.8]
K03652	0.0405002	0.0638739	0.0694885	0.0570164	kamA; lysine 2,3-aminomutase [EC:5.4.3.2]
K03654	0.261753	0.414337	0.318923	0.309459	hemL; glutamate-1-semialdehyde 2,1-aminomutase [EC:5.4.3.8]
K03655	0.577507	0.299429	0.251991	0.724737	E5.4.99.2A, mcmA1; methylmalonyl-CoA mutase, N-terminal domain [EC:5.4.99.2]
K03657	1.11187	1.18477	1.14246	1.21405	E5.4.99.2B, mcmA2; methylmalonyl-CoA mutase, C-terminal domain [EC:5.4.99.2]
K03660	0.00383794	0.0923136	0.103703	0.0227447	glf; UDP-galactopyranose mutase [EC:5.4.99.9]
K03664	0.0817926	0.0629474	0.0621038	0.0671598	pcaB; 3-carboxy-cis,cis-muconate cycloisomerase [EC:5.5.1.2]
K03665	0.233565	0.224646	0.179282	0.196202	INO1, ISYNA1; myo-inositol-1-phosphate synthase [EC:5.5.1.4]
K03666	0.000514883	0.0214734	0.0245964	0.00576201	YARS, tyrS; tyrosyl-tRNA synthetase [EC:6.1.1.1]
K03667	0.06827	0.0204208	0.0177255	0.0964348	WARS, trpS; tryptophanyl-tRNA synthetase [EC:6.1.1.2]
K03671	0.0930582	0.106698	0.109229	0.11802	TARS, thrS; threonyl-tRNA synthetase [EC:6.1.1.3]
K03684	0.0685163	0.00947822	0.00947769	0.052679	LARS, leuS; leucyl-tRNA synthetase [EC:6.1.1.4]
K03685	0.127531	0.0918683	0.0823929	0.108271	IARS, ileS; isoleucyl-tRNA synthetase [EC:6.1.1.5]
K03686	0.218966	0.15223	0.164061	0.273633	AARS, alaS; alanyl-tRNA synthetase [EC:6.1.1.7]
K03687	0.102658	0.0843123	0.0858911	0.0965057	VARS, valS; valyl-tRNA synthetase [EC:6.1.1.9]
K03688	0.179994	0.0622529	0.122736	0.200703	MARS, metG; methionyl-tRNA synthetase [EC:6.1.1.10]
K03693	0.0125997	0.00903308	0.00271031	0.0166183	SARS, serS; seryl-tRNA synthetase [EC:6.1.1.11]
K03694	0.0275964	0.133547	0.145836	0.134977	aspS; aspartyl-tRNA synthetase [EC:6.1.1.12]
K03695	0.298597	0.362142	0.342049	0.490502	glyQ; glycyl-tRNA synthetase alpha chain [EC:6.1.1.14]
K03696	0.449764	0.332444	0.341809	0.465127	glyS; glycyl-tRNA synthetase beta chain [EC:6.1.1.14]
K03697	0.265127	0.0476546	0.00242527	0.206772	GARS, glyS1; glycyl-tRNA synthetase [EC:6.1.1.14]
K03698	0.117351	0.0956212	0.055194	0.114288	PARS, proS; prolyl-tRNA synthetase [EC:6.1.1.15]
K03699	0.146436	0.171643	0.212551	0.210956	CARS, cysS; cysteinyl-tRNA synthetase [EC:6.1.1.16]
K03700	0.0621732	0.0106348	0.00751665	0.0405083	EARS, gltX; glutamyl-tRNA synthetase [EC:6.1.1.17]
K03701	0.652319	0.533579	0.431577	0.61585	QARS, glnS; glutaminyl-tRNA synthetase [EC:6.1.1.18]
K03702	0.342005	0.285035	0.248774	0.285845	RARS, argS; arginyl-tRNA synthetase [EC:6.1.1.19]
K03703	0.325615	0.282119	0.259249	0.287781	FARSA, pheS; phenylalanyl-tRNA synthetase alpha chain [EC:6.1.1.20]
K03704	0.0838728	0.0658006	0.0950315	0.079854	FARSB, pheT; phenylalanyl-tRNA synthetase beta chain [EC:6.1.1.20]
K03705	0.163867	0.131148	0.123118	0.140511	HARS, hisS; histidyl-tRNA synthetase [EC:6.1.1.21]
K03706	0.00154668	0.0630929	0.081746	0.0183705	NARS, asnS; asparaginyl-tRNA synthetase [EC:6.1.1.22]
K03707	0.138955	0.0550103	0.0164952	0.118241	ACSS1_2, acs; acetyl-CoA synthetase [EC:6.2.1.1]
K03708	0.029395	0.037637	0.0400215	0.0477508	ACSL, fadD; long-chain acyl-CoA synthetase [EC:6.2.1.3]
K03709	0.133626	0.0276132	0.00580713	0.113171	sucD; succinyl-CoA synthetase alpha subunit [EC:6.2.1.5]
K03710	0.183762	0.243533	0.118187	0.122877	sucC; succinyl-CoA synthetase beta subunit [EC:6.2.1.5]
K03711	0.0648464	0.064777	0.10515	0.0847834	bioW; 6-carboxyhexanoate--CoA ligase [EC:6.2.1.14]
K03713	0.0373333	0.00664061	0.000591063	0.0266087	citC; [citrate (pro-3S)-lyase] ligase [EC:6.2.1.22]
K03716	0.00219696	0.0668641	0.118948	0.0338924	menE; O-succinylbenzoic acid---CoA ligase [EC:6.2.1.26]
K03718	0.00722403	0.0286382	0.0350146	0.0206581	asnA; aspartate--ammonia ligase [EC:6.3.1.1]
K03719	0.0531991	0.0532101	0.0521787	0.0661605	glnA, GLUL; glutamine synthetase [EC:6.3.1.2]
K03722	0.275633	0.268271	0.145756	0.191239	nadE; NAD+ synthase [EC:6.3.1.5]
K03723	0.601672	0.497113	0.455421	0.512606	panC; pantoate--beta-alanine ligase [EC:6.3.2.1]
K03724	0.0936477	0.0129667	0.0653834	0.158603	gshA; glutamate--cysteine ligase [EC:6.3.2.2]
K03727	0.13466	0.0190832	0	0.104686	ddl; D-alanine-D-alanine ligase [EC:6.3.2.4]
K03733	0.15447	0.0375606	0.0261703	0.119979	purC; phosphoribosylaminoimidazole-succinocarboxamide synthase [EC:6.3.2.6]
K03734	0.201897	0.178336	0.179376	0.239819	murC; UDP-N-acetylmuramate--alanine ligase [EC:6.3.2.8]
K03735	0.0110997	0.0431065	0.109106	0.0577055	murD; UDP-N-acetylmuramoylalanine--D-glutamate ligase [EC:6.3.2.9]
K03736	0.0067718	0.0288348	0.0630991	0.0293814	rex; redox-sensing transcriptional repressor
K03737	0.0402254	0.757338	0.806206	0.234149	murE; UDP-N-acetylmuramoyl-L-alanyl-D-glutamate--2,6-diaminopimelate ligase [EC:6.3.2.13]
K03739	0.147875	0.146025	0.0360734	0.0924698	murF; UDP-N-acetylmuramoyl-tripeptide--D-alanyl-D-alanine ligase [EC:6.3.2.10]
K03740	0.153735	0.146421	0.0383225	0.0906146	purM; phosphoribosylformylglycinamidine cyclo-ligase [EC:6.3.3.1]
K03741	0.172448	0.0517832	0.0521722	0.0888877	MTHFS; 5-formyltetrahydrofolate cyclo-ligase [EC:6.3.3.2]
K03742	0.0614682	0.0992716	0.124551	0.105104	bioD; dethiobiotin synthetase [EC:6.3.3.3]
K03743	0.0289236	0.0075071	0.00541604	0.0254409	pyrG, CTPS; CTP synthase [EC:6.3.4.2]
K03744	0.108773	0.0535411	0.0212251	0.17668	fhs; formate--tetrahydrofolate ligase [EC:6.3.4.3]
K03750	0.00244317	0.125187	0.179138	0.0272082	purA, ADSS; adenylosuccinate synthase [EC:6.3.4.4]
K03752	0.0015202	0.0474969	0.0593788	0.0139429	argG, ASS1; argininosuccinate synthase [EC:6.3.4.5]
K03753	0.00119659	0.0326542	0.0407495	0.0116969	purD; phosphoribosylamine---glycine ligase [EC:6.3.4.13]
K03756	0.000767749	0.0129955	0.021799	0.00183346	E6.3.5.1, NADSYN1, QNS1, nadE; NAD+ synthase (glutamine-hydrolysing) [EC:6.3.5.1]
K03758	0.0362519	0.0257263	0.0259186	0.0609042	guaA, GMPS; GMP synthase (glutamine-hydrolysing) [EC:6.3.5.2]
K03760	0.00417668	0.0141305	0.0176501	0.0133395	PFAS, purL; phosphoribosylformylglycinamidine synthase [EC:6.3.5.3]
K03761	0.129116	0.0196278	0.0127035	0.0803164	asnB, ASNS; asparagine synthase (glutamine-hydrolysing) [EC:6.3.5.4]
K03762	0.0909601	0.011501	0.0144104	0.0828673	carB, CPA2; carbamoyl-phosphate synthase large subunit [EC:6.3.5.5]
K03763	0.501765	0.543281	0.490365	0.397165	carA, CPA1; carbamoyl-phosphate synthase small subunit [EC:6.3.5.5]
K03767	0.0767273	0.00897334	0.00609268	0.0380207	PC, pyc; pyruvate carboxylase [EC:6.4.1.1]
K03768	0.0698708	0.146261	0.114488	0.0551667	pycB; pyruvate carboxylase subunit B [EC:6.4.1.1]
K03769	0.00417011	0.0974067	0.0777239	0.0191025	accC; acetyl-CoA carboxylase, biotin carboxylase subunit [EC:6.4.1.2 6.3.4.14]
K03770	0.00220869	0.0181165	0.0202243	0.0143837	accA; acetyl-CoA carboxylase carboxyl transferase subunit alpha [EC:6.4.1.2 2.1.3.15]
K03771	0.00582185	0.0204813	0.0141352	0.0206797	accD; acetyl-CoA carboxylase carboxyl transferase subunit beta [EC:6.4.1.2 2.1.3.15]
K03773	0.0060096	0.00758429	0.00555102	0.0220591	PCCB, pccB; propionyl-CoA carboxylase beta chain [EC:6.4.1.3 2.1.3.15]
K03775	0.000959485	0.014751	0.0105184	0.00381487	E6.5.1.2, ligA, ligB; DNA ligase (NAD+) [EC:6.5.1.2]
K03777	0.000181526	0	0.0145844	5.29406e-05	ABC.X4.S; putative ABC transport system substrate-binding protein
K03778	0.462769	0.106944	0.0222823	0.2996	ABC-2.A; ABC-2 type transport system ATP-binding protein
K03779	0.00198705	0.00282182	0.017778	0.00161919	wza, gfcE; polysaccharide biosynthesis/export protein
K03780	0.00152961	0.00185923	0.0126867	0.00124511	ABC-2.P; ABC-2 type transport system permease protein
K03781	0.00114211	0.0232986	0.0396795	0.000342182	ABC-2.TX; HlyD family secretion protein
K03782	0.000341448	0.0204621	0.0574087	0	livG; branched-chain amino acid transport system ATP-binding protein
K03783	0.00351971	0.0783546	0.0970428	0.0222273	livF; branched-chain amino acid transport system ATP-binding protein
K03784	0.0364952	0.0806541	0.0374436	0.0191284	livH; branched-chain amino acid transport system permease protein
K03785	0.084048	0.0442235	0.0832492	0.0855459	livM; branched-chain amino acid transport system permease protein
K03786	0.0229592	0.0313783	0.0164369	0.0213876	livK; branched-chain amino acid transport system substrate-binding protein
K03787	0.00166411	0.0586219	0.0759274	0.0238322	proV; glycine betaine/proline transport system ATP-binding protein [EC:7.6.2.9]
K04068	0.124409	0.111833	0.106499	0.157884	proW; glycine betaine/proline transport system permease protein
K04069	0.132664	0.223301	0.232657	0.163222	proX; glycine betaine/proline transport system substrate-binding protein
K04070	0.0040301	0.0854884	0.0861468	0.0245316	ABC.CD.A; putative ABC transport system ATP-binding protein
K04072	0.485255	0.3716	0.251657	0.319047	ABC.CD.P; putative ABC transport system permease protein
K04074	0.0762694	0.0656813	0.045208	0.0655983	ABC.CD.TX; HlyD family secretion protein
K04075	0.220159	0.204037	0.178622	0.188116	cbiO; cobalt/nickel transport system ATP-binding protein
K04076	0.00370344	0.103218	0.0260204	0	cbiM; cobalt/nickel transport system permease protein
K04077	0.292338	0.262524	0.218188	0.238663	cbiQ; cobalt/nickel transport system permease protein
K04078	0.0536158	0.0409682	0.0365095	0.0461227	cbiN; cobalt/nickel transport protein
K04079	0.0329174	0.195449	0.237364	0.216951	afuC, fbpC; iron(III) transport system ATP-binding protein [EC:7.2.2.7]
K04083	0.105672	0.108211	0.108648	0.0873832	afuB, fbpB; iron(III) transport system permease protein
K04084	0.00420955	0.0195484	0.0185026	0.0151972	afuA, fbpA; iron(III) transport system substrate-binding protein
K04086	0.1707	0.0403957	0.000730323	0.0352526	ABC.FEV.A; iron complex transport system ATP-binding protein [EC:7.2.2.-]
K04092	0.0251248	0.00354293	0	0.0209821	TC.FEV.OM; iron complex outermembrane recepter protein
K04094	0.00513425	0.0196624	0.0115555	0.00756313	ABC.FEV.P; iron complex transport system permease protein
K04095	0.121343	0.0209737	0.0166606	0.121868	ABC.FEV.S; iron complex transport system substrate-binding protein
K04096	0.190131	0.13373	0.135484	0.192989	modC; molybdate transport system ATP-binding protein [EC:7.3.2.5]
K04138	0.00201424	0	0	0	modB; molybdate transport system permease protein
K04140	9.18858e-05	0	0	0	modE; molybdate transport system regulatory protein
K04146	0.0270784	0.00433779	0	0.025236	modA; molybdate transport system substrate-binding protein
K04160	5.7148e-05	0.000106003	0	0	ABC.MS.P; multiple sugar transport system permease protein
K04257	0.00039025	0.000222017	0	0.000542426	ABC.MS.P1; multiple sugar transport system permease protein
K04260	0.00474193	0	0	0.000130992	ABC.MS.S; multiple sugar transport system substrate-binding protein
K04427	0.000639346	0	0	0	ABC.PA.A; polar amino acid transport system ATP-binding protein [EC:7.4.2.1]
K04467	9.53596e-05	0	0	0	ABC.PA.P; polar amino acid transport system permease protein
K04477	0.00201861	0.0880398	0.105265	0.0159356	ABC.PA.S; polar amino acid transport system substrate-binding protein
K04485	0.239771	0.183137	0.170522	0.282127	ABC.PE.A; peptide/nickel transport system ATP-binding protein
K04486	0.115795	0.158203	0.133089	0.0956682	ABC.PE.P; peptide/nickel transport system permease protein
K04487	0.222577	0.277282	0.288842	0.320939	ABC.PE.P1; peptide/nickel transport system permease protein
K04488	0.0824452	0.0881297	0.0719579	0.0725499	ABC.PE.S; peptide/nickel transport system substrate-binding protein
K04516	0.00148534	0.00271649	0	0.00557178	pstB; phosphate transport system ATP-binding protein [EC:7.3.2.1]
K04517	0.149534	0.0863168	0.0875558	0.131519	pstC; phosphate transport system permease protein
K04518	0.0116356	0.00460942	0.00115085	0.0375315	pstA; phosphate transport system permease protein
K04536	0.00683573	0.00106404	0	0	phoU; phosphate transport system protein
K04562	0.00206148	0.0515292	0.0592967	0.0196895	pstS; phosphate transport system substrate-binding protein
K04564	0.0819245	0.0948689	0.109387	0.0722846	phnC; phosphonate transport system ATP-binding protein [EC:7.3.2.2]
K04567	0.283518	0.279535	0.24525	0.244682	phnE; phosphonate transport system permease protein
K04572	7.50253e-05	0	0	0	phnD; phosphonate transport system substrate-binding protein
K04638	0.000340855	0	0	0.00103642	cysA; sulfate/thiosulfate transport system ATP-binding protein [EC:7.3.2.3]
K04653	2.93154e-05	0.013762	0.0136165	0.000373446	cysU; sulfate/thiosulfate transport system permease protein
K04655	4.18972e-05	0.0436925	0.0451935	0.00129812	cysW; sulfate/thiosulfate transport system permease protein
K04656	7.39662e-05	0.104265	0.119727	0.00172758	ABC.SN.A; NitT/TauT family transport system ATP-binding protein
K04659	6.94757e-06	0	0	0	ABC.SN.P; NitT/TauT family transport system permease protein
K04663	0.00028735	0	0	0.000730508	ABC.SN.S; NitT/TauT family transport system substrate-binding protein
K04706	0.00705238	0.000731789	0	0.00801206	ABC.SP.A; putative spermidine/putrescine transport system ATP-binding protein
K04720	0.00399468	0.116439	0.1345	0.0267273	ABC.SP.P; putative spermidine/putrescine transport system permease protein
K04749	0.000727461	0.0190732	0.0081399	0.000193162	ABC.SP.P1; putative spermidine/putrescine transport system permease protein
K04750	0.000107899	0.00485601	0.0182956	0	ABC.SP.S; putative spermidine/putrescine transport system substrate-binding protein
K04751	0.027026	0.0597302	0.0231579	0.0274072	ABC.SS.A; simple sugar transport system ATP-binding protein [EC:7.5.2.-]
K04757	0.00112508	0.0189225	0.0105307	0.000317572	ABC.SS.P; simple sugar transport system permease protein
K04758	0.037446	0.0719855	0.0834503	0.0524504	ABC.SS.S; simple sugar transport system substrate-binding protein
K04759	0.254103	0.525124	0.633975	0.321301	mlaF, linL, mkl; phospholipid/cholesterol/gamma-HCH transport system ATP-binding protein
K04760	0.00102909	0.00368876	0.00596289	0.000843615	mlaE, linK; phospholipid/cholesterol/gamma-HCH transport system permease protein
K04761	0.00133533	0.00227868	0.00940913	0.00499029	mlaD, linM; phospholipid/cholesterol/gamma-HCH transport system substrate-binding protein
K04762	0.000752413	0.00433579	0.00411238	0.00308493	ABC.X2.A; putative ABC transport system ATP-binding protein
K04763	0.144478	0.141848	0.124204	0.120536	ABC.X2.P; putative ABC transport system permease protein
K04767	0.00157401	0.0102809	0.00524367	0.0018658	metN; D-methionine transport system ATP-binding protein
K04769	0.00247626	0.0628468	0.0662709	0.0137569	metI; D-methionine transport system permease protein
K04771	0.222711	0.159925	0.262104	0.161871	metQ; D-methionine transport system substrate-binding protein
K04773	0.00662951	0.0521442	0.0253408	0.0127241	ABC.ZM.A; zinc/manganese transport system ATP-binding protein
K04782	0.0141685	0.00134578	0.00355239	0.0130548	ABC.ZM.P; zinc/manganese transport system permease protein
K04794	7.0323e-05	0	0	0	zurR, zur; Fur family transcriptional regulator, zinc uptake regulator
K04799	0.00017047	0	0	0	ABC.ZM.S; zinc/manganese transport system substrate-binding protein
K04819	0.000520813	0.00132332	0	0	acpP; acyl carrier protein
K04844	0.00192634	0.00363681	0.0599323	0.000999432	agaR; DeoR family transcriptional regulator, aga operon transcriptional repressor
K04940	0.0539522	0.0177913	0.0309381	0.0482701	agaS; tagatose-6-phosphate ketose/aldose isomerase [EC:5.-.-.-]
K04960	0.0119868	0.00158282	0	0.0132248	allC; allantoate deiminase [EC:3.5.3.9]
K05020	0.0022014	0.0825735	0.104019	0.00307485	APC; adenomatosis polyposis coli protein
K05053	0.00277263	0.000697641	0	0.000100229	dnaD; DNA replication protein
K05058	0.000576055	0	0	0	araE; MFS transporter, SP family, arabinose:H+ symporter
K05129	0.000658833	0.00131486	0	0.000288455	araR; GntR family transcriptional regulator, arabinose operon transcriptional repressor
K05275	0.0139741	0.00355016	0.00673875	0.020802	atoE; short-chain fatty acids transporter
K05306	0.00790938	0.0227855	0.00220156	0.0145758	ATPF0A, atpB; F-type H+-transporting ATPase subunit a
K05311	0.0560966	0.106834	0.0991306	0.0848278	ATPF0B, atpF; F-type H+-transporting ATPase subunit b
K05337	0.00172228	0.0314733	0.0321815	0.00597492	ATPF0C, atpE; F-type H+-transporting ATPase subunit c
K05338	0.0242768	0.00440709	0	0.0228264	ATPF1A, atpA; F-type H+/Na+-transporting ATPase subunit alpha [EC:7.1.2.2 7.2.2.1]
K05339	0.0356785	0.00891272	0.000262321	0.033783	ATPF1B, atpD; F-type H+/Na+-transporting ATPase subunit beta [EC:7.1.2.2 7.2.2.1]
K05340	0.123317	0.0253589	0.00125659	0.103894	ATPF1D, atpH; F-type H+-transporting ATPase subunit delta
K05341	0.0275873	0.00252695	0	0.0550805	ATPF1E, atpC; F-type H+-transporting ATPase subunit epsilon
K05342	0.0721502	0.00965964	0	0.131581	ATPF1G, atpG; F-type H+-transporting ATPase subunit gamma
K05343	0.00850687	0.0218189	0	0.0152392	ATPVA, ntpA, atpA; V/A-type H+/Na+-transporting ATPase subunit A [EC:7.1.2.2 7.2.2.1]
K05346	0.00939862	0.00112844	0.00241478	0.020618	ATPVB, ntpB, atpB; V/A-type H+/Na+-transporting ATPase subunit B
K05349	0.49823	0.370813	0.240785	0.49603	ATPVC, ntpC, atpC; V/A-type H+/Na+-transporting ATPase subunit C
K05350	0.0856624	0.0122236	0.030789	0.0688064	ATPVD, ntpD, atpD; V/A-type H+/Na+-transporting ATPase subunit D
K05351	0.0196259	0.00253362	0	0.0317145	ATPVE, ntpE, atpE; V/A-type H+/Na+-transporting ATPase subunit E
K05352	0.00177218	0.00170028	0	0.00144606	ATPVF, ntpF, atpF; V/A-type H+/Na+-transporting ATPase subunit F
K05363	0.0628809	0.00773901	0	0.0015292	ATPVI, ntpI, atpI; V/A-type H+/Na+-transporting ATPase subunit I
K05364	0.0868865	0.121292	0.129287	0.100411	ATPVK, ntpK, atpK; V/A-type H+/Na+-transporting ATPase subunit K
K05366	0.260905	0.366986	0.340724	0.356115	accB, bccP; acetyl-CoA carboxylase biotin carboxyl carrier protein
K05499	0.000436045	0	0.010606	0	betT, betS; choline/glycine/proline betaine transport protein
K05515	0.0148533	0.346373	0.395593	0.0790753	bioC; malonyl-CoA O-methyltransferase [EC:2.1.1.197]
K05516	0.00112419	0.0021085	0.00750371	0.00408601	bioH; pimeloyl-[acyl-carrier protein] methyl ester esterase [EC:3.1.1.85]
K05520	0.0738152	0.0103577	0.00613883	0.0481941	blaI; BlaI family transcriptional regulator, penicillinase repressor
K05589	3.9652e-05	0.00374215	0.00369511	0.000250323	blaR1; bla regulator protein blaR1
K05592	0.179882	0.374094	0.384613	0.201513	cbiD; cobalt-precorrin-5B (C1)-methyltransferase [EC:2.1.1.195]
K05595	0.0191775	0.0233523	0.00955277	0.0064458	cbiG; cobalt-precorrin 5A hydrolase [EC:3.7.1.12]
K05596	0.0528216	0.00663538	0.00959036	0.0467712	cbiK; sirohydrochlorin cobaltochelatase [EC:4.99.1.3]
K05601	0.0259121	0.442105	0.436524	0.0931417	cbiT; cobalt-precorrin-6B (C15)-methyltransferase [EC:2.1.1.196]
K05602	0.0274994	0.00402034	0	0.00864963	ftnA, ftn; ferritin [EC:1.16.3.2]
K05606	0.000148229	0.00671602	0.00476518	0.000304408	yggT; YggT family protein
K05628	0.00443094	0	0	0.00169252	cobB-cbiA; cobyrinic acid a,c-diamide synthase [EC:6.3.5.9 6.3.5.11]
K05694	0.000158057	0.00446181	0	0.000398414	cobC, phpB; alpha-ribazole phosphatase [EC:3.1.3.73]
K05695	0.000103748	0	0.0114382	0.00705905	cbiB, cobD; adenosylcobinamide-phosphate synthase [EC:6.3.1.10]
K05732	6.31212e-05	0	0	0	cobN; cobaltochelatase CobN [EC:6.6.1.2]
K05748	2.68583e-05	0	0	0	cobP, cobU; adenosylcobinamide kinase / adenosylcobinamide-phosphate guanylyltransferase [EC:2.7.1.156 2.7.7.62]
K05750	3.86776e-05	0	0	0	cobQ, cbiP; adenosylcobyric acid synthase [EC:6.3.5.10]
K05770	0.0410916	0.0533296	0.0344075	0.0257947	E2.7.8.26, cobS, cobV; adenosylcobinamide-GDP ribazoletransferase [EC:2.7.8.26]
K05771	4.16854e-05	0	0.00810547	0.00439993	comEA; competence protein ComEA
K05776	0.00292764	0.00350801	0.0138901	0.0109949	comEC; competence protein ComEC
K05780	3.47378e-05	0.0059235	0.00546443	0	comFA; competence protein ComFA
K05781	0.000125565	0.00722813	0.00636895	0	comFB; competence protein ComFB
K05786	0.12557	0.0290206	0.00967084	0.0852597	comFC; competence protein ComFC
K05794	0.052876	0.0632567	0.0497508	0.0608995	comGA; competence protein ComGA
K05799	0.0206564	0.0741352	0.0907025	0.0413995	comGB; competence protein ComGB
K05801	0.00134147	0.00364549	0.0190931	0.00482053	comGC; competence protein ComGC
K05807	0.00115863	0.00716095	0.00796336	0.0050735	coxA, ctaD; cytochrome c oxidase subunit I [EC:7.1.1.9]
K05808	0.00288799	0.0663988	0.0816611	0.0164943	cpaB, rcpC; pilus assembly protein CpaB
K05810	0.00466284	0.07811	0.0834865	0.0224812	cpaF, tadA; pilus assembly protein CpaF [EC:7.4.2.8]
K05812	0.00158256	0.0180993	0.00756392	0	crtB; 15-cis-phytoene synthase [EC:2.5.1.32]
K05813	0.106085	0.0612751	0.145332	0.128588	MET8; precorrin-2 dehydrogenase / sirohydrochlorin ferrochelatase [EC:1.3.1.76 4.99.1.4]
K05814	0.128373	0.0670026	0.0988631	0.151635	dnaA; chromosomal replication initiator protein
K05815	0.108299	0.070205	0.095948	0.130257	dnaB; replicative DNA helicase [EC:3.6.4.12]
K05816	0.033227	0.00866968	0.00788981	0.0253522	dnaC; DNA replication protein DnaC
K05822	0.0624859	0.0128981	0.00216662	0.0451406	dnaG; DNA primase [EC:2.7.7.101]
K05823	0.12588	0.0270363	0.00585409	0.0791515	dpo; DNA polymerase bacteriophage-type [EC:2.7.7.7]
K05825	0.144492	0.0840967	0.11797	0.111032	polA; DNA polymerase I [EC:2.7.7.7]
K05832	0.122269	0.0950654	0.0438678	0.0730285	dnaE; DNA polymerase III subunit alpha [EC:2.7.7.7]
K05833	0.099339	0.0859852	0.0412515	0.060161	dnaN; DNA polymerase III subunit beta [EC:2.7.7.7]
K05837	0.13841	0.201437	0.14969	0.118723	holA; DNA polymerase III subunit delta [EC:2.7.7.7]
K05838	0.0522491	0.00697163	0.00765764	0.0437478	holB; DNA polymerase III subunit delta' [EC:2.7.7.7]
K05845	0.197203	0.210717	0.228013	0.279092	dnaQ; DNA polymerase III subunit epsilon [EC:2.7.7.7]
K05846	0.137648	0.0424096	0.0552131	0.171424	dnaX; DNA polymerase III subunit gamma/tau [EC:2.7.7.7]
K05847	0.177168	0.150942	0.175157	0.24022	dinB; DNA polymerase IV [EC:2.7.7.7]
K05853	4.11771e-05	0	0	0	elaA; ElaA protein
K05878	0.0539386	0.063389	0.0566861	0.0582705	fusA, GFM, EFG; elongation factor G
K05879	0.0307947	0.0385105	0.0366592	0.0342062	efp; elongation factor P
K05881	0.0177691	0.0225541	0.0204489	0.0193679	tsf, TSFM; elongation factor Ts
K05895	0.0028147	0.0594865	0.0709352	0.0204382	tuf, TUFM; elongation factor Tu
K05896	0.120294	0.0957973	0.084458	0.107912	entC; isochorismate synthase [EC:5.4.4.2]
K05908	0.00203941	0.00244085	0	0.0072344	fabK; enoyl-[acyl-carrier protein] reductase II [EC:1.3.1.9]
K05916	0.00410445	0.0424768	0.0210953	0	fabZ; 3-hydroxyacyl-[acyl-carrier-protein] dehydratase [EC:4.2.1.59]
K05919	0.00257441	0.0328284	0.0486066	0.0129835	TSTA3, fcl; GDP-L-fucose synthase [EC:1.1.1.271]
K05934	0.00233116	0.054807	0.073583	0.0173287	fdrA; FdrA protein
K05936	0.00207249	0.0545237	0.0747482	0.017208	flbD; flagellar protein FlbD
K05937	0.0145538	0.00211662	0	0.00240365	flgB; flagellar basal-body rod protein FlgB
K05942	0.000468114	0.000386417	0.0782273	0.0313516	flgC; flagellar basal-body rod protein FlgC
K05946	0.03699	0.0554014	0.0456147	0.0624648	flgD; flagellar basal-body rod modification protein FlgD
K05964	0.00280953	0.00366395	0.0125234	0.00469254	flgE; flagellar hook protein FlgE
K05966	0.00446652	0.00481708	0.0202309	0.00714655	flgG; flagellar basal-body rod protein FlgG
K05967	0.00147771	0.0318975	0.0426005	0.0135894	flgK; flagellar hook-associated protein 1 FlgK
K05970	0.00485101	0.00530049	0.0234789	0.0123156	flgL; flagellar hook-associated protein 3 FlgL
K05979	0.00198306	0.0557408	0.0551892	0.017326	flhA; flagellar biosynthesis protein FlhA
K05985	0.0612529	0.0687996	0.0592912	0.0526357	flhB; flagellar biosynthetic protein FlhB
K05988	0.044566	0.0539735	0.000576801	0.0332032	flhF; flagellar biosynthesis protein FlhF
K05989	0.0242838	0.0174405	0.0375573	0.0512837	fliA; RNA polymerase sigma factor for flagellar operon FliA
K05995	0.0881256	0.0155814	0.0158581	0.0593975	fliC; flagellin
K06001	2.16052e-05	0.00961448	0.0279467	0.000439764	fliD; flagellar hook-associated protein 2
K06012	0.0031126	0.0849258	0.107484	0.0259407	fliE; flagellar hook-basal body complex protein FliE
K06015	0.00876711	0.150493	0.13667	0.036102	fliF; flagellar M-ring protein FliF
K06016	0.101917	0.0812005	0.0889774	0.146576	fliG; flagellar motor switch protein FliG
K06019	0.00424602	0.0182778	0.0094946	0.0111832	fliH; flagellar assembly protein FliH
K06023	0.104397	0.101809	0.0989725	0.0858788	fliI; flagellum-specific ATP synthase [EC:7.4.2.8]
K06024	0.0985541	0.0774267	0.0618286	0.0835578	fliJ; flagellar FliJ protein
K06039	2.63499e-05	0	0.00333173	0	fliM; flagellar motor switch protein FliM
K06041	0.0342097	0.0293916	0.0196049	0.0354977	fliNY, fliN; flagellar motor switch protein FliN/FliY
K06042	0.00215447	0.043934	0.060729	0.0141132	fliP; flagellar biosynthetic protein FliP
K06069	0.0184115	0.00269135	0	0.0192825	fliQ; flagellar biosynthetic protein FliQ
K06111	0.00210986	0.0200968	0.00219056	0	fliR; flagellar biosynthetic protein FliR
K06113	0.0136563	0.0508542	0.00590472	0.0400842	fliS; flagellar protein FliS
K06117	0.0554189	0.0075685	0.000135796	0.0414166	fliY, tcyA; L-cystine transport system substrate-binding protein
K06131	0.175672	0.267572	0.33245	0.201803	sufE; cysteine desulfuration protein SufE
K06133	0.000793675	0.0117048	0.0662458	0.011299	rdgB; XTP/dITP diphosphohydrolase [EC:3.6.1.66]
K06216	0.00072153	0.0014826	0	0.000625987	fucP; MFS transporter, FHS family, L-fucose permease
K06217	0.158163	0.0681414	0.0654103	0.122019	gatA, QRSL1; aspartyl-tRNA(Asn)/glutamyl-tRNA(Gln) amidotransferase subunit A [EC:6.3.5.6 6.3.5.7]
K06218	0.00964742	0.0036971	0.00616562	0.000732369	gatB, PET112; aspartyl-tRNA(Asn)/glutamyl-tRNA(Gln) amidotransferase subunit B [EC:6.3.5.6 6.3.5.7]
K06221	0.000338779	0	0.00794502	0.000105023	gatC, GATC; aspartyl-tRNA(Asn)/glutamyl-tRNA(Gln) amidotransferase subunit C [EC:6.3.5.6 6.3.5.7]
K06223	0.0324639	0.0377427	0.136742	0.178812	gcvH, GCSH; glycine cleavage system H protein
K06233	0.000158989	0.00365661	0.00207259	0.000567251	GLPF; glycerol uptake facilitator protein
K06237	6.94757e-06	0	0	0	glpP; glycerol uptake operon antiterminator
K06252	0.00300728	0.000444591	0	0.0075137	glpR; DeoR family transcriptional regulator, glycerol-3-phosphate regulon repressor
K06273	0.000234608	0	0	0	glpT; MFS transporter, OPA family, glycerol-3-phosphate transporter
K06282	0.000144713	0.0387439	0.0497775	0.000721423	glpX; fructose-1,6-bisphosphatase II [EC:3.1.3.11]
K06283	0.000949995	0.0239973	0.0290954	0.00665971	gspG; general secretion pathway protein G
K06284	0.00163098	0.0449258	0.0294429	0.00693951	gyrA; DNA gyrase subunit A [EC:5.6.2.2]
K06286	0.194005	0.032958	0.00243322	0.121699	gyrB; DNA gyrase subunit B [EC:5.6.2.2]
K06287	0.0734302	0.0776136	0.0720014	0.0842953	K02477; two-component system, LytTR family, response regulator
K06295	0.00285088	0.0152353	0.312656	0.131491	K02478; two-component system, LytTR family, sensor kinase [EC:2.7.13.3]
K06296	0.00112415	0.00988866	0.11073	0.0425283	K02481; two-component system, NtrC family, response regulator
K06297	0.000884586	0.00613028	0.114908	0.0464384	K02483; two-component system, OmpR family, response regulator
K06306	0.000193473	0.000477515	0.200828	0.0302002	K02484; two-component system, OmpR family, sensor kinase [EC:2.7.13.3]
K06310	0.000650064	0.0219959	0.100473	0.0386202	hemA; glutamyl-tRNA reductase [EC:1.2.1.70]
K06317	0.000763724	0.0191463	0.0196835	0.00642849	hemK, prmC, HEMK; release factor glutamine methyltransferase [EC:2.1.1.297]
K06333	0.000688063	0.0209124	0.0329568	0.00541868	hemN, hemZ; oxygen-independent coproporphyrinogen III oxidase [EC:1.3.98.3]
K06334	0.00187131	0.0472066	0.0707637	0.0146907	yabN; tetrapyrrole methylase family protein / MazG family protein
K06346	0.0836404	0.0920415	0.0812827	0.107001	hisF; imidazole glycerol-phosphate synthase subunit HisF [EC:4.3.2.10]
K06350	0.00259398	0.0429765	0.049758	0.0209801	hisH; imidazole glycerol-phosphate synthase subunit HisH [EC:4.3.2.10]
K06351	0.0019762	0.0300908	0.0292524	0.0140943	hisZ; ATP phosphoribosyltransferase regulatory subunit
K06373	0.00180955	0.0589832	0.0340989	0.000441052	HINT1, hinT, hit; histidine triad (HIT) family protein
K06374	0.00154236	0.052761	0.0296285	0.000194664	lpxL, htrB; Kdo2-lipid IVA lauroyltransferase/acyltransferase [EC:2.3.1.241 2.3.1.-]
K06378	0.0012301	0.0304216	0.0373229	0.00790117	infA; translation initiation factor IF-1
K06379	0.00139146	0.039951	0.0460572	0.00878778	infB, MTIF2; translation initiation factor IF-2
K06381	0.00421616	0.105695	0.113318	0.0259708	infC, MTIF3; translation initiation factor IF-3
K06382	0.00900701	0.243223	0.254831	0.061684	ispB; octaprenyl-diphosphate synthase [EC:2.5.1.90]
K06383	0.00181264	0.0735745	0.0862293	0.0175966	kdgR; LacI family transcriptional regulator, kdg operon repressor
K06384	0.00151084	0.0313893	0.0445298	0.014793	kdgT; 2-keto-3-deoxygluconate permease
K06385	0.00343201	0.102197	0.119159	0.0252065	kdtA, waaA; 3-deoxy-D-manno-octulosonic-acid transferase [EC:2.4.99.12 2.4.99.13 2.4.99.14 2.4.99.15]
K06387	0.0023562	0.069672	0.0769274	0.0189247	ksgA; 16S rRNA (adenine1518-N6/adenine1519-N6)-dimethyltransferase [EC:2.1.1.182]
K06390	0.00323286	0.0842203	0.0989887	0.0214187	lacI, galR; LacI family transcriptional regulator
K06391	0.00123883	0.0266027	0.026273	0.00967976	lacR; DeoR family transcriptional regulator, lactose phosphotransferase system repressor
K06392	0.000124633	0.00488727	0.00693058	0.00015968	lacY; MFS transporter, OHS family, lactose permease
K06393	0.00122104	0.0327954	0.0389275	0.0085992	lpxC; UDP-3-O-[3-hydroxymyristoyl] N-acetylglucosamine deacetylase [EC:3.5.1.108]
K06394	0.00277449	0.111775	0.123198	0.0277703	lpxD; UDP-3-O-[3-hydroxymyristoyl] glucosamine N-acyltransferase [EC:2.3.1.191]
K06396	0.00149165	0.0374384	0.060587	0.0146743	manR; activator of the mannose operon, transcriptional antiterminator
K06397	0.000335771	0.0176831	0.0268551	0.000182645	menA; 1,4-dihydroxy-2-naphthoate polyprenyltransferase [EC:2.5.1.74]
K06398	0.00456222	0.136548	0.15814	0.033167	menC; O-succinylbenzoate synthase [EC:4.2.1.113]
K06399	0.00280131	0.126577	0.153756	0.0262332	menD; 2-succinyl-5-enolpyruvyl-6-hydroxy-3-cyclohexene-1-carboxylate synthase [EC:2.2.1.9]
K06405	0.00119329	0.0578555	0.0475502	0.0109858	menF; menaquinone-specific isochorismate synthase [EC:5.4.4.2]
K06406	0.00296725	0.124372	0.103964	0.0208778	motA; chemotaxis protein MotA
K06407	0.00109327	0.0442732	0.0357086	0.00738743	motB; chemotaxis protein MotB
K06408	0.00321541	0.0753946	0.0332628	0	murG; UDP-N-acetylglucosamine--N-acetylmuramyl-(pentapeptide) pyrophosphoryl-undecaprenol N-acetylglucosamine transferase [EC:2.4.1.227]
K06409	0.0137209	0.412584	0.559577	0.131464	nagB, GNPDA; glucosamine-6-phosphate deaminase [EC:3.5.99.6]
K06410	0.000463793	0.00598034	0.0160182	0.000345401	nagD; NagD protein
K06411	0.00049493	0.00446615	0.0106184	0.000528905	NRT, narK, nrtP, nasA; MFS transporter, NNP family, nitrate/nitrite transporter
K06412	0.00100566	0.0238528	0.0407938	0.0122698	nifB; nitrogen fixation protein NifB
K06415	0.00444327	0.0764522	0.0825211	0.0314135	nifD; nitrogenase molybdenum-iron protein alpha chain [EC:1.18.6.1]
K06416	0.000535641	0.0201728	0.0212798	0.00530357	nifE; nitrogenase molybdenum-cofactor synthesis protein NifE
K06436	0.0022627	0.0777186	0.0806052	0.0215103	nifH; nitrogenase iron protein NifH
K06438	0.00136511	0.079499	0.129901	0.0291094	nifHD1, nifI1; nitrogen regulatory protein PII 1
K06442	0.129936	0.0951349	0.0895014	0.105726	nifHD2, nifI2; nitrogen regulatory protein PII 2
K06487	5.54958e-06	0	0	0	nifK; nitrogenase molybdenum-iron protein beta chain [EC:1.18.6.1]
K06493	0.000801089	0.000245487	0	0.000311419	nifV; homocitrate synthase NifV [EC:2.3.3.14]
K06518	0.00101964	0.033041	0.0462997	0.0099866	nirC; nitrite transporter
K06603	0.0186171	0.0272504	0.0231062	0.0246918	nusA; transcription termination/antitermination protein NusA
K06605	0.00062812	0.00252283	0.00239206	0.00156375	nusG; transcription termination/antitermination protein NusG
K06606	0.000814518	0.00154433	0.0206537	0.00106031	ORC2; origin recognition complex subunit 2
K06608	0.00298538	0.0122489	0.055579	0.0075172	pabC; 4-amino-4-deoxychorismate lyase [EC:4.1.3.38]
K06609	0.000289976	0.00044815	0	0	parC; topoisomerase IV subunit A [EC:5.6.2.2]
K06610	0.0192493	0.00474289	0.00259825	0.033449	parE; topoisomerase IV subunit B [EC:5.6.2.2]
K06726	0.027348	0.030825	0.0337487	0.0336447	cdaR; carbohydrate diacid regulator
K06813	0.000199912	0.000302437	0.000426336	0	pilB; type IV pilus assembly protein PilB
K06861	0.00202784	0.0119837	0.0105522	0.00663839	pilC; type IV pilus assembly protein PilC
K06864	0.0490363	0.0642504	0.0845841	0.0657718	pilD, pppA; leader peptidase (prepilin peptidase) / N-methyltransferase [EC:3.4.23.43 2.1.1.-]
K06871	0.0240224	0.220865	0.255809	0.0754915	pilM; type IV pilus assembly protein PilM
K06872	0.0099293	0.0333713	0.0287275	0.0234942	pilQ; type IV pilus assembly protein PilQ
K06878	0.0666164	0.011424	0.00391241	0.0430229	pilT; twitching motility protein PilT
K06881	0.112367	0.117209	0.110951	0.102552	prmA; ribosomal protein L11 methyltransferase [EC:2.1.1.-]
K06885	0.155033	0.142446	0.0622432	0.107547	PSMB8, LMP7; 20S proteasome subunit beta 8 [EC:3.4.25.1]
K06888	0.000525177	0.0406733	0.122025	0.0455547	agaF; N-acetylgalactosamine PTS system EIIA component [EC:2.7.1.-]
K06889	0.235442	0.159203	0.130788	0.246322	agaV; N-acetylgalactosamine PTS system EIIB component [EC:2.7.1.-]
K06890	0.117897	0.0309307	0.0293037	0.0873341	agaW; N-acetylgalactosamine PTS system EIIC component
K06891	0.000721785	0.0178682	0.0191662	0.00628956	agaE; N-acetylgalactosamine PTS system EIID component
K06895	0.0460368	0.0135922	0.0231865	0.0426552	glvC, malP, aglA; alpha-glucoside PTS system EIICB component [EC:2.7.1.208 2.7.1.-]
K06896	0.0377641	0.057549	0.0133139	0.0371204	bglF, bglP; beta-glucoside PTS system EIICBA component [EC:2.7.1.-]
K06898	0.039558	0.0571767	0.0730592	0.0567845	celC, chbA; cellobiose PTS system EIIA component [EC:2.7.1.196 2.7.1.205]
K06901	0.5368	0.457806	0.351203	0.415813	celA, chbB; cellobiose PTS system EIIB component [EC:2.7.1.196 2.7.1.205]
K06902	0.0904393	0.03021	0.0206462	0.0549133	celB, chbC; cellobiose PTS system EIIC component
K06904	0.00639558	0.00366073	0.015824	0.0152831	ptsP, fruB; fructose PTS system EIIA component [EC:2.7.1.202]
K06907	0.00248808	0.00301737	0.0258748	0.00850641	fruAb; fructose PTS system EIIB component [EC:2.7.1.202]
K06909	0.0119738	0.055017	0.0510922	0.353896	fruA; fructose PTS system EIIBC or EIIC component [EC:2.7.1.202]
K06915	0.163626	0.1103	0.0282326	0.0371025	gatA, sgcA; galactitol PTS system EIIA component [EC:2.7.1.200]
K06919	0.191963	0.0845418	0.0949315	0.517226	gatB, sgcB; galactitol PTS system EIIB component [EC:2.7.1.200]
K06920	0.0272782	0.0326408	0.0110155	0.0331153	gatC, sgcC; galactitol PTS system EIIC component
K06923	0.00338982	0.0565692	0.101504	0.0326713	crr; sugar PTS system EIIA component [EC:2.7.1.-]
K06925	0.0844179	0.0692645	0.0613555	0.0772131	srlB; glucitol/sorbitol PTS system EIIA component [EC:2.7.1.198]
K06929	0.000779441	0.00629991	0.00716549	9.68669e-05	srlE; glucitol/sorbitol PTS system EIIB component [EC:2.7.1.198]
K06937	7.63385e-05	0.0017421	0.081694	0.0287889	srlA; glucitol/sorbitol PTS system EIIC component
K06940	0.000146068	0.0262381	0.0247557	0.000261484	ptsH; phosphocarrier protein HPr
K06941	0.0629382	0.11668	0.132935	0.0768516	lacF; lactose PTS system EIIA component [EC:2.7.1.207]
K06942	0.200886	0.152432	0.13324	0.155882	lacE; lactose PTS system EIICB component [EC:2.7.1.207]
K06948	0.121471	0.0210753	0.00103003	0.0770805	malX; maltose/glucose PTS system EIICB component [EC:2.7.1.199 2.7.1.208]
K06949	0.0998203	0.139283	0.123683	0.0829067	manXa; mannose PTS system EIIA component [EC:2.7.1.191]
K06950	0.191074	0.0494855	0.031942	0.136103	manX; mannose PTS system EIIAB component [EC:2.7.1.191]
K06956	0.031043	0.0901057	0.0844735	0.0512566	manY; mannose PTS system EIIC component
K06958	0.0992017	0.117397	0.11349	0.127239	manZ; mannose PTS system EIID component
K06959	0.229822	0.260659	0.257018	0.214667	cmtB; mannitol PTS system EIIA component [EC:2.7.1.197]
K06960	0.0274834	0.0274632	0.0248825	0.0341545	mtlA, cmtA; mannitol PTS system EIICBA or EIICB component [EC:2.7.1.197]
K06962	0.0283872	0.0583475	0.052313	0.0484301	nagE; N-acetylglucosamine PTS system EIICBA or EIICB component [EC:2.7.1.193]
K06967	0.0697383	0.0762089	0.0776864	0.061435	ptsN; nitrogen PTS system EIIA component [EC:2.7.1.-]
K06969	0.0557808	0.160075	0.0905307	0.0607894	scrA, sacP, sacX, ptsS; sucrose PTS system EIIBCA or EIIBC component [EC:2.7.1.211]
K06972	0.00256997	0.099109	0.275901	0.0760471	sorB; sorbose PTS system EIIB component [EC:2.7.1.206]
K06973	0.00228579	0.0556564	0.0701633	0.0159228	sorA; sorbose PTS system EIIC component
K06975	0.0313342	0.01193	0.00862777	0.0164406	sorM; sorbose PTS system EIID component
K06978	0.0211481	0.0269542	0.000256718	0.0494534	treB, treP; trehalose PTS system EIIBC or EIIBCA component [EC:2.7.1.201]
K06979	0.00136566	0.0100017	0.00279222	0	ulaC, sgaA; ascorbate PTS system EIIA or EIIAB component [EC:2.7.1.194]
K06987	0.00887692	0.11299	0.0161982	0	ulaB, sgaB; ascorbate PTS system EIIB component [EC:2.7.1.194]
K06988	0.150633	0.047085	0.0124889	0.165988	pyrDII; dihydroorotate dehydrogenase electron transfer subunit
K06990	0.00385497	0.00444001	0	0.0122618	pyrP, uraA; uracil permease
K06993	0.00969423	0.0727238	0.0756313	0.0533731	pyrR; pyrimidine operon attenuation protein / uracil phosphoribosyltransferase [EC:2.4.2.9]
K06994	0.409643	0.127827	0.00121228	0.458346	rbfA; ribosome-binding factor A
K06997	0.0663707	0.0787535	0.0837471	0.0642297	prfA, MTRF1, MRF1; peptide chain release factor 1
K06999	0.0790979	0.0149915	0.00711313	0.0875272	prfB; peptide chain release factor 2
K07000	0.00237581	0.00596766	0.0115301	0.00811937	prfC; peptide chain release factor 3
K07001	0.00677227	0.141217	0.174133	0.0423646	frr, MRRF, RRF; ribosome recycling factor
K07002	0.0598629	0.0178459	0.000552555	0.046204	waaB, rfaB; UDP-D-galactose:(glucosyl)LPS alpha-1,6-D-galactosyltransferase [EC:2.4.1.-]
K07003	0.00038936	0.0822567	0.103007	0.000442698	waaF, rfaF; heptosyltransferase II [EC:2.4.-.-]
K07005	0.0325252	0.0774718	0.0745258	0.0329725	solA; N-methyl-L-tryptophan oxidase [EC:1.5.3.-]
K07006	0.0215435	0.0047172	0	0.0200233	wecA, tagO, rfe; UDP-GlcNAc:undecaprenyl-phosphate/decaprenyl-phosphate GlcNAc-1-phosphate transferase [EC:2.7.8.33 2.7.8.35]
K07009	0.121648	0.0681644	0.0532976	0.0978973	rhaT; L-rhamnose-H+ transport protein
K07010	0.1334	0.0988386	0.052753	0.120025	ribT; riboflavin biosynthesis RibT protein
K07012	0.0930701	0.0722773	0.197239	0.186516	rimM; 16S rRNA processing protein RimM
K07014	0.00428936	0.00419686	0.0170526	0.012981	RP-L1, MRPL1, rplA; large subunit ribosomal protein L1
K07015	0.0620952	0.0154708	0.00949419	0.0380244	RP-L10, MRPL10, rplJ; large subunit ribosomal protein L10
K07023	0.0477277	0.0298604	0.0262381	0.0174956	RP-L11, MRPL11, rplK; large subunit ribosomal protein L11
K07025	0.00919185	0.0204657	0.0459864	0.0275153	RP-L13, MRPL13, rplM; large subunit ribosomal protein L13
K07027	0.127826	0.0988064	0.0672247	0.0886767	RP-L14, MRPL14, rplN; large subunit ribosomal protein L14
K07029	0.128817	0.0221388	0.000823536	0.0999332	RP-L15, MRPL15, rplO; large subunit ribosomal protein L15
K07030	0.186887	0.190017	0.186633	0.157043	RP-L16, MRPL16, rplP; large subunit ribosomal protein L16
K07032	0.0145116	0.00595598	0.00629663	0.000251396	RP-L17, MRPL17, rplQ; large subunit ribosomal protein L17
K07035	0.362132	0.059721	0.0234435	0.133684	RP-L18, MRPL18, rplR; large subunit ribosomal protein L18
K07037	0.0152367	0.148859	0.153471	0.0808376	RP-L19, MRPL19, rplS; large subunit ribosomal protein L19
K07038	0.0130079	0.0421745	0.0938173	0.0800211	RP-L2, MRPL2, rplB; large subunit ribosomal protein L2
K07040	0.0964507	0.0654691	0.0646027	0.0783466	RP-L20, MRPL20, rplT; large subunit ribosomal protein L20
K07042	0.0779641	0.0684457	0.0617816	0.0655127	RP-L21, MRPL21, rplU; large subunit ribosomal protein L21
K07043	0.0389282	0.0864439	0.100013	0.048252	RP-L22, MRPL22, rplV; large subunit ribosomal protein L22
K07045	0.0048483	0.0213908	0.0482831	0.020379	RP-L23, MRPL23, rplW; large subunit ribosomal protein L23
K07048	0.000191482	0.0122177	0.0218966	0.000196166	RP-L24, MRPL24, rplX; large subunit ribosomal protein L24
K07052	0.442828	0.393507	0.167067	0.414467	RP-L25, rplY; large subunit ribosomal protein L25
K07053	0.0490749	0.155598	0.116205	0.0524959	RP-L27, MRPL27, rpmA; large subunit ribosomal protein L27
K07056	0.172787	0.117904	0.111059	0.141911	RP-L28, MRPL28, rpmB; large subunit ribosomal protein L28
K07560	0.0748635	0.0553764	0.0528349	0.0667456	RP-L29, rpmC; large subunit ribosomal protein L29
K07566	0.143644	0.159645	0.132437	0.123398	RP-L3, MRPL3, rplC; large subunit ribosomal protein L3
K07568	0.119002	0.131574	0.124547	0.109555	RP-L30, MRPL30, rpmD; large subunit ribosomal protein L30
K07570	0.045588	0.00860862	0.000371528	0.0299499	RP-L31, rpmE; large subunit ribosomal protein L31
K07571	0.0282283	0.0395357	0.034519	0.0469711	RP-L32, MRPL32, rpmF; large subunit ribosomal protein L32
K07574	0.0518104	0.0394312	0.0237473	0.03325	RP-L32e, RPL32; large subunit ribosomal protein L32e
K07576	0.0013677	0.0280794	0.108847	0.0334254	RP-L33, MRPL33, rpmG; large subunit ribosomal protein L33
K07584	0.0175383	0.0149842	0.0324002	0.0328734	RP-L34, MRPL34, rpmH; large subunit ribosomal protein L34
K07586	0.0608613	0.0111141	0.000805402	0.0400991	RP-L35, MRPL35, rpmI; large subunit ribosomal protein L35
K07588	0.000181442	0.021825	0.0218551	0.000655247	RP-L36, MRPL36, rpmJ; large subunit ribosomal protein L36
K07590	0.000241979	0.00944619	0.0226086	0.00813518	RP-L4, MRPL4, rplD; large subunit ribosomal protein L4
K07636	0.165127	0.201985	0.194544	0.158386	RP-L5, MRPL5, rplE; large subunit ribosomal protein L5
K07646	0.0421266	0.250439	0.154217	0.0464635	RP-L6, MRPL6, rplF; large subunit ribosomal protein L6
K07652	0.253423	0.0446098	0.00159583	0.149442	RP-L7, MRPL12, rplL; large subunit ribosomal protein L7/L12
K07654	0.00179014	0	0	0.000896627	RP-L9, MRPL9, rplI; large subunit ribosomal protein L9
K07658	0.0807207	0.081403	0.0778616	0.0663223	RP-S1, rpsA; small subunit ribosomal protein S1
K07667	0.0393798	0.0790199	0.0528381	0.0194678	RP-S10, MRPS10, rpsJ; small subunit ribosomal protein S10
K07668	0.0967715	0.0162613	0.00480929	0.0566731	RP-S11, MRPS11, rpsK; small subunit ribosomal protein S11
K07670	0.000887255	0	0	0.000406784	RP-S12, MRPS12, rpsL; small subunit ribosomal protein S12
K07683	0.00712744	0.000824333	0	0.0185238	RP-S13, rpsM; small subunit ribosomal protein S13
K07693	0.00961734	0.00353893	9.8918e-05	0.0171193	RP-S14, MRPS14, rpsN; small subunit ribosomal protein S14
K07696	0.00602176	0.000859371	0	0.0137555	RP-S15, MRPS15, rpsO; small subunit ribosomal protein S15
K07699	0.00255001	0.0776325	0.0914028	0.0188108	RP-S16, MRPS16, rpsP; small subunit ribosomal protein S16
K07704	0.0834402	0.0227786	0.0260225	0.0806216	RP-S16e, RPS16; small subunit ribosomal protein S16e
K07705	0.0348778	0.00721645	0.0104827	0.0334715	RP-S17, MRPS17, rpsQ; small subunit ribosomal protein S17
K07706	0.0224961	0.0405439	0.0822237	0.0166063	RP-S18, MRPS18, rpsR; small subunit ribosomal protein S18
K07707	0.0495677	0.027022	0.0553877	0.0162572	RP-S19, rpsS; small subunit ribosomal protein S19
K07713	0.00241843	0.0032445	0.0117506	0.00859233	RP-S2, MRPS2, rpsB; small subunit ribosomal protein S2
K07717	0.0107768	0.0259653	0.0791183	0.0543404	RP-S20, rpsT; small subunit ribosomal protein S20
K07718	0.0212109	0.738527	0.909552	0.0119143	RP-S21, MRPS21, rpsU; small subunit ribosomal protein S21
K07719	0.00746309	0.0202893	0.0601531	0.0410969	RP-S3, rpsC; small subunit ribosomal protein S3
K07720	0.0220755	0.592758	0.78718	0.0244005	RP-S3e, RPS3; small subunit ribosomal protein S3e
K07723	6.20198e-05	0.000607433	0.0193728	0.00698107	RP-S4, rpsD; small subunit ribosomal protein S4
K07726	0.000401519	0	0.00327764	0	RP-S5, MRPS5, rpsE; small subunit ribosomal protein S5
K07727	0.0221903	0.0340864	0.0392358	0.0341506	RP-S6, MRPS6, rpsF; small subunit ribosomal protein S6
K07729	0.0425094	0.0485961	0.072769	0.0373099	RP-S7, MRPS7, rpsG; small subunit ribosomal protein S7
K07736	0.0325223	0.046352	0.0139778	0.0224529	RP-S8, rpsH; small subunit ribosomal protein S8
K07738	0.0509724	0.057576	0.0632607	0.0655044	RP-S9, MRPS9, rpsI; small subunit ribosomal protein S9
K07741	0.0121341	0.0180205	0.0207482	0.0246708	RPB6, POLR2F; DNA-directed RNA polymerases I, II, and III subunit RPABC2
K07742	0.0305464	0.029638	0.0273982	0.0286607	RPC1, POLR3A; DNA-directed RNA polymerase III subunit RPC1 [EC:2.7.7.6]
K07750	0.0026261	0.000666608	0	3.59853e-05	PSMD4, RPN10; 26S proteasome regulatory subunit N10
K07768	0.0683379	0.00953117	0	0.0559043	PSMD7, RPN8; 26S proteasome regulatory subunit N8
K07776	0.0382115	0.00537969	0	0.0303247	rpoA; DNA-directed RNA polymerase subunit alpha [EC:2.7.7.6]
K07778	0.0181346	0.00631036	0	0.0304272	rpoB; DNA-directed RNA polymerase subunit beta [EC:2.7.7.6]
K07784	0.00645793	0.0186811	0.0184321	0.00187825	rpoC; DNA-directed RNA polymerase subunit beta' [EC:2.7.7.6]
K07787	0.00585633	0.00847592	0.0253501	0.0213598	rpoE; DNA-directed RNA polymerase subunit delta
K07788	0.000957028	0.0172302	0.0271908	0.0025566	rpoZ; DNA-directed RNA polymerase subunit omega [EC:2.7.7.6]
K07791	0.00426564	0.0300267	0.0172697	0.0123104	secA; preprotein translocase subunit SecA [EC:7.4.2.8]
K07792	0.000448118	0.018604	0.0185808	0.00157799	secD; preprotein translocase subunit SecD
K07798	0.00192198	0.00276276	0.00971841	0.0076404	secE; preprotein translocase subunit SecE
K07813	0.000173732	0.0314982	0.0554697	0.00690774	secF; preprotein translocase subunit SecF
K07816	0.1144	0.129182	0.121343	0.111692	secG; preprotein translocase subunit SecG
K07862	0.0107825	0.108703	0.0763269	0.0110818	secY; preprotein translocase subunit SecY
K07966	0.000354665	0	0	0	araD, ulaF, sgaE, sgbE; L-ribulose-5-phosphate 4-epimerase [EC:5.1.3.4]
K07968	0.000333526	0.00385371	0.000321407	0	ulaD, sgaH, sgbH; 3-dehydro-L-gulonate-6-phosphate decarboxylase [EC:4.1.1.85]
K07979	0.0587858	0.0716359	0.0543258	0.0465188	ulaE, sgaU, sgbU; L-ribulose-5-phosphate 3-epimerase [EC:5.1.3.22]
K07995	2.72819e-05	0	0	0	rpoD; RNA polymerase primary sigma factor
K08041	8.54043e-05	0	0	0	sigB; RNA polymerase sigma-B factor
K08073	0.000111373	0	0	0.000220133	sigH; RNA polymerase sporulation-specific sigma factor
K08093	0.0119149	0.0226687	0.00248497	0.0184396	rpoN; RNA polymerase sigma-54 factor
K08094	0.0098364	0.0243292	0.00194352	0.0171429	sigI; RNA polymerase sigma factor
K08097	0.00262194	0	0	0.00212921	sprL; SprT-like protein
K08138	0.00264461	0.0037001	0.0143263	0.00906951	APOD; apolipoprotein D and lipocalin family protein
K08152	0.0284225	0.00782744	0	0.00232745	SOS; son of sevenless
K08153	0.106001	0.0147546	0.0012621	0.0780557	lepB; signal peptidase I [EC:3.4.21.89]
K08156	0.0447092	0.00673782	0.0129154	0.0128265	lspA; signal peptidase II [EC:3.4.23.36]
K08161	0.232264	0.0601316	0.0195916	0.207481	SRP54, ffh; signal recognition particle subunit SRP54 [EC:3.6.5.4]
K08166	0.000345133	0	0	0.000465734	ftsY; fused signal recognition particle receptor
K08167	0.000506113	0	0	0.000381101	ssb; single-strand DNA-binding protein
K08168	0.0662695	0.00804367	0	0.0542296	EIF1, SUI1; translation initiation factor 1
K08170	0.000323401	0.00646342	0.00440149	0.000883249	tatA; sec-independent protein translocase protein TatA
K08173	0.0139944	0.00467259	0.0123363	0.00686847	tatB; sec-independent protein translocase protein TatB
K08177	0.190032	0.0562366	0.0920196	0.18465	tatC; sec-independent protein translocase protein TatC
K08191	0.00264901	0.00330668	0.0121577	0.00987764	TFIIB, GTF2B, SUA7, tfb; transcription initiation factor TFIIB
K08217	0.119289	0.0555326	0.0679008	0.109071	thiC; phosphomethylpyrimidine synthase [EC:4.1.99.17]
K08218	0.00470943	0.0154372	0.0143451	0.016365	thiF; sulfur carrier protein ThiS adenylyltransferase [EC:2.7.7.73]
K08222	0.00252091	0.00341346	0	0.00889888	thiG; thiazole synthase [EC:2.8.1.10]
K08223	0.000726233	0.0274831	0.0179144	0.00195458	thiH; 2-iminoacetate synthase [EC:4.1.99.19]
K08224	0.000543351	0.0143271	0.0740374	0.0267369	thiI; tRNA uracil 4-sulfurtransferase [EC:2.8.1.4]
K08234	0.0198481	0.032521	0.0116088	0.0169685	thiJ; protein deglycase [EC:3.5.1.124]
K08256	0.0608358	0.00802287	0	0.045385	thiS; sulfur carrier protein
K08281	0.0148614	0.00413913	0.00769156	0.0225721	TOP1; DNA topoisomerase I [EC:5.6.2.1]
K08283	0.000544283	0	0	0.000850555	topA; DNA topoisomerase I [EC:5.6.2.1]
K08289	0.0720274	0.0111543	0.00899716	0.0642832	topB; DNA topoisomerase III [EC:5.6.2.1]
K08296	0.0284159	0.00614496	0.00697499	0.0223152	truB, PUS4, TRUB1; tRNA pseudouridine55 synthase [EC:5.4.99.25]
K08300	0.166469	0.0412833	0.0290429	0.138397	ubiE; demethylmenaquinone methyltransferase / 2-methoxy-6-polyprenyl-1,4-benzoquinol methylase [EC:2.1.1.163 2.1.1.201]
K08301	0.00763144	0.150587	0.167514	0.0469178	ubiX, bsdB, PAD1; flavin prenyltransferase [EC:2.5.1.129]
K08302	0.00379562	0.0764592	0.0278251	0	ureE; urease accessory protein
K08303	0.0217244	0.42146	0.46593	0.112895	ureF; urease accessory protein
K08307	0.00235878	0.0171178	0.0141745	0.0103756	ureG; urease accessory protein
K08309	0.00224076	0.0912311	0.0848227	0.0148503	ureD, ureH; urease accessory protein
K08313	0.000174452	0.000170184	0.00563232	0	virD4, lvhD4; type IV secretion system protein VirD4 [EC:7.4.2.8]
K08314	6.17232e-05	0.0113756	0.0140554	0	yajC; preprotein translocase subunit YajC
K08316	0.0313946	0.00525478	0.00566216	0.0249983	rumA; 23S rRNA (uracil1939-C5)-methyltransferase [EC:2.1.1.190]
K08317	0.147155	0.0662863	0.0138025	0.181192	trmL, cspR; tRNA (cytidine/uridine-2'-O-)-methyltransferase [EC:2.1.1.207]
K08323	0.00662408	0.00239403	0.0205143	0.00316413	yidC, spoIIIJ, OXA1, ccfA; YidC/Oxa1 family membrane protein insertase
K08334	0.00325023	0.000635018	0.000297263	0.000122836	rlmB; 23S rRNA (guanosine2251-2'-O)-methyltransferase [EC:2.1.1.185]
K08369	0.398901	0.0669612	0.1653	0.441043	EIF3E, INT6; translation initiation factor 3 subunit E
K08372	0.0978638	0.0123709	0	0.0925531	EIF4A; translation initiation factor 4A
K08384	0.0117872	0.288412	0.357227	0.0902141	lpxH; UDP-2,3-diacylglucosamine hydrolase [EC:3.6.1.54]
K08483	0.421034	0.256785	0.195523	0.286371	kdsC; 3-deoxy-D-manno-octulosonate 8-phosphate phosphatase (KDO 8-P phosphatase) [EC:3.1.3.45]
K08591	0.0640874	0.036752	0.0335269	0.0446278	gmhA, lpcA; D-sedoheptulose 7-phosphate isomerase [EC:5.3.1.28]
K08600	0.00204966	0.0277801	0.0844102	0.0160151	gmhC, hldE, waaE, rfaE; D-beta-D-heptose 7-phosphate kinase / D-beta-D-heptose 1-phosphate adenosyltransferase [EC:2.7.1.167 2.7.7.70]
K08601	2.26643e-05	0	0	4.20663e-05	gmhB; D-glycero-D-manno-heptose 1,7-bisphosphate phosphatase [EC:3.1.3.82 3.1.3.83]
K08602	0.212571	0.240508	0.135301	0.133801	TC.CIC; chloride channel protein, CIC family
K08641	0.0398696	0.00950347	0.00721195	0.0624994	mscL; large conductance mechanosensitive channel
K08659	0.305683	0.069657	0.00278692	0.391203	corA; magnesium transporter
K08678	0.00264219	0.0035723	0	0.00875594	TC.GPH; glycoside/pentoside/hexuronide:cation symporter, GPH family
K08679	0.00260737	0.0149264	0.00484169	0.00864949	TC.AAT; amino acid transporter, AAT family
K08680	0.0690197	0.0101443	0.0071548	0.0351869	TC.APA; basic amino acid/polyamine antiporter, APA family
K08681	0.167177	0.0480497	0.0365186	0.0752899	emrE, qac, mmr, smr; small multidrug resistance pump
K08724	0.224707	0.0390373	0	0.142161	TC.DME; drug/metabolite transporter, DME family
K08744	0.0305886	0.014003	0.0121983	0.0222015	TC.GNTP; gluconate:H+ symporter, GntP family
K08773	6.33754e-05	0	0	0	TC.CITMHS; citrate-Mg2+:H+ or citrate-Ca2+:H+ symporter, CitMHS family
K08826	0.000237658	0	0	0	lctP; lactate permease
K08827	4.34647e-05	0.00622983	0	0	TC.POT; proton-dependent oligopeptide transporter, POT family
K08870	3.74491e-05	0	0	0	TC.PIT; inorganic phosphate transporter, PiT family
K08874	0.00296797	8.06425e-05	0	0.00863847	TC.SSS; solute:Na+ symporter, SSS family
K08879	7.20175e-06	0	0	0	TC.NSS; neurotransmitter:Na+ symporter, NSS family
K08900	0.000753091	0.000472398	0	0	TC.AGCS; alanine or glycine:cation symporter, AGCS family
K08963	0.00203233	0.0203577	0.0246243	0.00246961	TC.LIVCS; branched-chain amino acid:cation transporter, LIVCS family
K08968	0.0502707	0.0217595	0.0115057	0.042127	gltS; glutamate:Na+ symporter, ESS family
K08969	0.307008	0.0440165	0.000537886	0.215684	nhaA; Na+:H+ antiporter, NhaA family
K08972	0.0582691	0.016146	0.00819879	0.0379806	nhaC; Na+:H+ antiporter, NhaC family
K08974	0.0505997	0.0787505	0.0420603	0.00634471	TC.CPA1; monovalent cation:H+ antiporter, CPA1 family
K08978	0.000855441	0.0164472	0.0111219	0.000784594	TC.CNT; concentrative nucleoside transporter, CNT family
K08981	0.181239	0.0298298	0.000474521	0.0633751	TC.DASS; divalent anion:Na+ symporter, DASS family
K08982	0.00099795	0.00414147	0.000123367	0.000520678	amt, AMT, MEP; ammonium transporter, Amt family
K08984	0.00209961	0.027554	0.00819991	0.00309531	TC.SULP; sulfate permease, SulP family
K08987	0.055155	0.00884754	0.0013928	0.0258962	mntH; manganese transport protein
K08996	0.117769	0.0193651	0.00733858	0.0575222	yjbB; phosphate:Na+ symporter
K08998	0.0275437	0.0264304	0.0172784	0.0381264	ACR3, arsB; arsenite transporter
K08999	7.24835e-05	0.000111565	0	0	TC.DCUC, dcuC, dcuD; C4-dicarboxylate transporter, DcuC family
K09001	0.00258416	0.0333821	0.0148788	0.000698529	TC.MATE, SLC47A, norM, mdtK, dinF; multidrug resistance protein, MATE family
K09004	0.022901	0.00982749	0.00245359	0.0077799	fruA; fructan beta-fructosidase [EC:3.2.1.80]
K09009	0.0285983	0.0040259	0	0.022682	iolE; inosose dehydratase [EC:4.2.1.44]
K09011	0.00269672	0.00418963	0	0.00913203	iolD; 3D-(3,5/4)-trihydroxycyclohexane-1,2-dione acylhydrolase (decyclizing) [EC:3.7.1.22]
K09013	0.132862	0.0661897	0.0696068	0.111773	iolB; 5-deoxy-glucuronate isomerase [EC:5.3.1.30]
K09014	0.235351	0.0853715	0.102134	0.19747	iolC; 5-dehydro-2-deoxygluconokinase [EC:2.7.1.92]
K09015	0.202956	0.0360524	0.01189	0.143747	iolJ; 6-phospho-5-dehydro-2-deoxy-D-gluconate aldolase [EC:4.1.2.29]
K09022	0.0711618	0.0508066	0.0573127	0.0760496	dapdh; diaminopimelate dehydrogenase [EC:1.4.1.16]
K09117	0.0466	0.0491243	0.048124	0.0439587	dnaB; replication initiation and membrane attachment protein
K09118	0.164812	0.0608343	0.190918	0.196177	butA, budC; meso-butanediol dehydrogenase / (S,S)-butanediol dehydrogenase / diacetyl reductase [EC:1.1.1.- 1.1.1.76 1.1.1.304]
K09121	0.0669549	0.0920603	0.120069	0.0944145	dltA; D-alanine--poly(phosphoribitol) ligase subunit 1 [EC:6.1.1.13]
K09125	0.00129979	0.00181207	0.00829964	0.00431559	PRDX2_4, ahpC; peroxiredoxin (alkyl hydroperoxide reductase subunit C) [EC:1.11.1.15]
K09128	0.00451092	0.000508548	0.0121357	0.0095449	ahpF; alkyl hydroperoxide reductase subunit F [EC:1.6.4.-]
K09137	0.000991935	0.00279646	0	0.00253178	cobI-cbiL; precorrin-2/cobalt-factor-2 C20-methyltransferase [EC:2.1.1.130 2.1.1.151]
K09155	0.00659786	0.0732583	0.0493204	0.0125687	cbiE; cobalt-precorrin-7 (C5)-methyltransferase [EC:2.1.1.289]
K09157	0.224925	0.121214	0.121084	0.184155	argR, ahrC; transcriptional regulator of arginine metabolism
K09164	0.0441423	0.0050837	0	0.0354793	chlD, bchD; magnesium chelatase subunit D [EC:6.6.1.1]
K09167	0.0525711	0.0162665	0.00251563	0.0110503	chlI, bchI; magnesium chelatase subunit I [EC:6.6.1.1]
K09193	0.000286121	0	0	0.000474247	mcp; methyl-accepting chemotaxis protein
K09228	0.00143018	0.00703125	0.00611815	0.00011604	cheA; two-component system, chemotaxis family, sensor kinase CheA [EC:2.7.13.3]
K09251	0.0136817	0.0482609	0.0209376	0.027034	cheW; purine-binding chemotaxis protein CheW
K09384	0.325526	0.0501772	0.0375707	0.136461	cheX; chemotaxis protein CheX
K09457	0.0199272	0.0253077	0.00339836	0.0230284	cheC; chemotaxis protein CheC
K09458	0.145824	0.183852	0.173224	0.124061	cheD; chemotaxis protein CheD [EC:3.5.1.44]
K09459	0.00247664	0.0428966	0.00296397	0	cheB; two-component system, chemotaxis family, protein-glutamate methylesterase/glutaminase [EC:3.1.1.61 3.5.1.44]
K09474	0.000725682	0.00444746	0.000310201	0.00596147	cheY; two-component system, chemotaxis family, chemotaxis protein CheY
K09493	0.0113474	0.00179082	0	0.0131157	cheV; two-component system, chemotaxis family, chemotaxis protein CheV
K09497	5.575e-05	8.75389e-05	0	0.000960371	tatD; TatD DNase family protein [EC:3.1.21.-]
K09502	0.000910132	0.0010201	0	0	E3.6.1.22, NUDT12, nudC; NAD+ diphosphatase [EC:3.6.1.22]
K09680	0.00146801	0.00259246	0.0126728	0.00526444	hsdM; type I restriction enzyme M protein [EC:2.1.1.72]
K09684	0.383799	0.0968163	0.0292448	0.318114	ugtP; processive 1,2-diacylglycerol beta-glucosyltransferase [EC:2.4.1.315]
K09685	0.096766	0.0920414	0.0805313	0.0799386	phnW; 2-aminoethylphosphonate-pyruvate transaminase [EC:2.6.1.37]
K09692	0.0421179	0.0324147	0.0207996	0.0170964	glmM; phosphoglucosamine mutase [EC:5.4.2.10]
K09693	0.107152	0.0443703	0.0274613	0.0830542	fruR2, fruR; DeoR family transcriptional regulator, fructose operon transcriptional repressor
K09694	8.50654e-05	0	0	0.000158321	spoU; RNA methyltransferase, TrmH family
K09695	0.000122006	0	0	0	mraW, rsmH; 16S rRNA (cytosine1402-N4)-methyltransferase [EC:2.1.1.199]
K09696	0.000161489	0.0597499	0.108449	0.026761	trmB, METTL1, TRM8; tRNA (guanine-N7-)-methyltransferase [EC:2.1.1.33]
K09697	0.00021923	0.0263209	0.0567844	0.0180062	mscS; small conductance mechanosensitive channel
K09698	0.174232	0.0746917	0.0409224	0.106217	emrB; MFS transporter, DHA2 family, multidrug resistance protein
K09699	0.00333644	0.00426427	0.000208838	0.00656291	MFS.CP; MFS transporter, CP family, cyanate transporter
K09702	0.0510743	0.0231124	0.00172368	0.0333332	TC.BCT; betaine/carnitine transporter, BCCT family
K09703	0.0063325	0.00385938	0.00248854	0.00631352	TC.BASS; bile acid:Na+ symporter, BASS family
K09704	0.00738654	0.0503639	0.0179958	0.0167122	TC.KEF; monovalent cation:H+ antiporter-2, CPA2 family
K09705	0.0230264	0.0382816	0.0200037	0.000786525	TC.NCS1; nucleobase:cation symporter-1, NCS1 family
K09706	0.00027481	0.0182391	0.0128047	0.000572187	thyX, thy1; thymidylate synthase (FAD) [EC:2.1.1.148]
K09707	0.0181589	0.0221447	0.0356879	0.0100765	ftsK, spoIIIE; DNA segregation ATPase FtsK/SpoIIIE, S-DNA-T family
K09710	0.0650998	0.0261541	0.0196867	0.0473222	rnhA, RNASEH1; ribonuclease HI [EC:3.1.26.4]
K09747	0.0201483	0.0418732	0.0433243	0.0322333	rnhB; ribonuclease HII [EC:3.1.26.4]
K09748	0.0521584	0.058562	0.0567932	0.0482766	rnhC; ribonuclease HIII [EC:3.1.26.4]
K09749	0.0130772	0.238796	0.156434	0.0405347	ulaA, sgaT; ascorbate PTS system EIIC component
K09758	0.00157163	0.0736208	0.0807208	0.014755	ulaG; L-ascorbate 6-phosphate lactonase [EC:3.1.1.-]
K09759	0.00261978	0.105415	0.0875052	0.000121549	chbG; chitin disaccharide deacetylase [EC:3.5.1.105]
K09760	0.0775	0.0370065	0.0456472	0.0676641	glcT; transcriptional antiterminator
K09761	0.120238	0.0934031	0.0871368	0.10207	glvR; RpiR family transcriptional regulator, glv operon transcriptional regulator
K09762	0.155695	0.125509	0.110945	0.130709	mtlR; mannitol operon transcriptional antiterminator
K09764	0.000574869	0.0215703	0.0224549	0.0055755	scrR; LacI family transcriptional regulator, sucrose operon repressor
K09765	0.0386414	0.0248002	0.0163468	0.0356044	treR2, treR; GntR family transcriptional regulator, trehalose operon transcriptional repressor
K09766	0.00214053	0.048093	0.0575782	0.0185202	licT, bglG; beta-glucoside operon transcriptional antiterminator
K09767	0.000158523	0.00816503	0.00968042	0.000287739	yydK; GntR family transcriptional regulator, transcriptional regulator of bglA
K09768	0.00138333	0.0381214	0.0527275	0.0104536	licR; lichenan operon transcriptional antiterminator
K09769	0.0394154	0.0116133	0.00405075	0.0482433	ydhQ; GntR family transcriptional regulator
K09770	0.00106425	0.0245659	0.0331485	0.0109949	gidA, mnmG, MTO1; tRNA uridine 5-carboxymethylaminomethyl modification enzyme
K09771	0.00064176	0.00376918	0.0188169	0.00682404	parA, soj; chromosome partitioning protein
K09772	0.0715094	0.0535481	0.0522701	0.0502413	parB, spo0J; ParB family transcriptional regulator, chromosome partitioning protein
K09773	0.0432854	0.111939	0.0839023	0.0742934	trkH, trkG, ktrB; trk system potassium uptake protein
K09775	0.000287477	0.0117493	0.0183829	0.000217128	trkA, ktrA; trk system potassium uptake protein
K09777	0.000971092	0.0235577	0.0217413	0.00581395	rsmB, sun; 16S rRNA (cytosine967-C5)-methyltransferase [EC:2.1.1.176]
K09779	0.00839889	0.036311	0.0270525	0.0137208	gidB, rsmG; 16S rRNA (guanine527-N7)-methyltransferase [EC:2.1.1.170]
K09786	0.00346624	0.0614367	0.0821833	0.0278749	umuC; DNA polymerase V
K09787	0.0331765	0.0392706	0.0428333	0.0347274	umuD; DNA polymerase V [EC:3.4.21.-]
K09790	0.0106851	0.0220658	0.0146945	0.0128896	nadA; quinolinate synthase [EC:2.5.1.72]
K09797	0.00131029	0.0070407	0.000756096	0.00421979	coxS; aerobic carbon-monoxide dehydrogenase small subunit [EC:1.2.5.3]
K09798	0.000292942	0.0050361	0.0143786	0.000776438	fixA, etfB; electron transfer flavoprotein beta subunit
K09800	0.00106899	0.017832	0.0494046	0.00274976	fixB, etfA; electron transfer flavoprotein alpha subunit
K09807	0.000152381	0.0249688	0.0258903	0.000482975	bioY; biotin transport system substrate-specific component
K09808	0.0049487	0.044406	0.0386523	0.0172694	birA; BirA family transcriptional regulator, biotin operon repressor / biotin---[acetyl-CoA-carboxylase] ligase [EC:6.3.4.15]
K09809	0.23353	0.0956256	0.090064	0.0745107	coaX; type III pantothenate kinase [EC:2.7.1.33]
K09810	0.00129369	0.0246476	0.0161218	0.00539536	gcpE, ispG; (E)-4-hydroxy-3-methylbut-2-enyl-diphosphate synthase [EC:1.17.7.1 1.17.7.3]
K09811	0.099636	0.12822	0.0990011	0.107709	ispH, lytB; 4-hydroxy-3-methylbut-2-en-1-yl diphosphate reductase [EC:1.17.7.4]
K09812	0.13364	0.107881	0.0816665	0.139996	smc; chromosome segregation protein
K09815	0.0670101	0.145648	0.187535	0.0678911	hupB; DNA-binding protein HU-beta
K09816	0.00487469	0.0747117	0.10557	0.0264339	ftsZ; cell division protein FtsZ
K09817	0.00747207	0.0639841	0.085283	0.0251245	rhaM; L-rhamnose mutarotase [EC:5.1.3.32]
K09819	0.0273122	0.00271571	0	0.0545552	gudP; MFS transporter, ACS family, glucarate transporter
K09820	0.000382286	0	0	0	rnpA; ribonuclease P protein component [EC:3.1.26.5]
K09825	0.173691	0.0569341	0.0459176	0.0646558	emrA; membrane fusion protein, multidrug efflux system
K09861	0.065131	0.0803062	0.0458741	0.0646211	clpX, CLPX; ATP-dependent Clp protease ATP-binding subunit ClpX
K09869	0.00367149	0	0	0.0946389	tig; trigger factor
K09903	0.109053	0.0870747	0.082335	0.0945792	sbcC, rad50; DNA repair protein SbcC/Rad50
K09922	0.00067743	0.000982615	0	0.00256612	sbcD, mre11; DNA repair protein SbcD/Mre11
K09935	0.00179802	0.0251557	0.0115132	0.00282259	kup; KUP system potassium uptake protein
K09936	0.202498	0.101205	0.0646367	0.173853	ruvA; holliday junction DNA helicase RuvA [EC:3.6.4.12]
K09946	2.96119e-05	0	0.00314317	0	ruvB; holliday junction DNA helicase RuvB [EC:3.6.4.12]
K09949	0.000221856	0.00339077	0.00261822	0.000686081	recA; recombination protein RecA
K09951	0.0139589	0.00699432	0.0237209	0.0305656	mutS; DNA mismatch repair protein MutS
K09952	0.0597679	0.0317399	0.00440659	0.144696	malT; LuxR family transcriptional regulator, maltose regulon positive regulatory protein
K09955	0.0720137	0.0729261	0.0691992	0.167522	exbB; biopolymer transport protein ExbB
K09960	0.00711952	0.0107961	0.000985411	0.0204904	tolQ; biopolymer transport protein TolQ
K09961	0.00979027	0.0147525	0.00213473	0.029897	csrA; carbon storage regulator
K09962	0.047121	0.00784034	0.000423789	0.0603646	BCP, PRXQ, DOT5; peroxiredoxin Q/BCP [EC:1.11.1.15]
K09963	0.0196626	0.158753	0.083886	0.0165137	recX; regulatory protein
K09967	0.00578347	0.00125969	0.0784002	0.0587759	tldD; TldD protein
K09972	0.000112771	0	0.00760742	0	mreB; rod shape-determining protein MreB and related proteins
K09973	0.000145857	0.0257241	0.019156	0	mreC; rod shape-determining protein MreC
K09974	0.0383185	0.00565532	0.00702461	0.0303219	mreD; rod shape-determining protein MreD
K09975	0.0100427	0.000823444	0.00429911	0.0202453	mutL; DNA mismatch repair protein MutL
K09976	0.0233766	0.00393002	0.000134166	0.0144067	mutH; DNA mismatch repair protein MutH
K09988	0.00277971	0.00290714	0.0134784	0.00451297	mutT, NUDT15, MTH2; 8-oxo-dGTP diphosphatase [EC:3.6.1.55]
K10005	0.0767322	0.0107279	0	0.0444372	mutY; A/G-specific adenine glycosylase [EC:3.2.2.31]
K10006	0.035481	0.00529382	0	0.0265286	hrpA; ATP-dependent helicase HrpA [EC:3.6.4.13]
K10007	0.0994306	0.0128111	0.000219535	0.0826883	recD; exodeoxyribonuclease V alpha subunit [EC:3.1.11.5]
K10008	0.0417984	0.00623306	0	0.0336285	recO; DNA repair protein RecO (recombination protein O)
K10009	0.0460739	0.0105854	0.00665134	0.0610046	acrA, mexA, adeI, smeD, mtrC, cmeA; membrane fusion protein, multidrug efflux system
K10010	0.0425557	0.00831953	0.00699374	0.0493469	ftsI; cell division protein FtsI (penicillin-binding protein 3) [EC:3.4.16.4]
K10026	0.00137613	0.0283143	0.0112855	0.000638077	ftsW, spoVE; cell division protein FtsW
K10027	0.0494887	0.0778184	0.0351222	0.013662	ftsQ; cell division protein FtsQ
K10036	0.320119	0.108196	0.0403761	0.236626	ftsA; cell division protein FtsA
K10037	0.0519427	0.0191788	0.0456218	0.0690432	pmbA; PmbA protein
K10038	0.193963	0.0861175	0.0580898	0.183682	mrp, NUBPL; ATP-binding protein involved in chromosome partitioning
K10039	0.099264	0.0486007	0.0555291	0.0756074	bfr; bacterioferritin [EC:1.16.3.1]
K10040	0.156987	0.0818465	0.0921912	0.120391	era, ERAL1; GTPase
K10041	0.0924646	0.042686	0.0487033	0.068643	lepA; GTP-binding protein LepA
K10112	0.228173	0.222427	0.170515	0.221756	xseA; exodeoxyribonuclease VII large subunit [EC:3.1.11.6]
K10117	0.469602	0.317658	0.259347	0.42272	xseB; exodeoxyribonuclease VII small subunit [EC:3.1.11.6]
K10118	0.268327	0.160004	0.160345	0.223854	wcaJ; putative colanic acid biosysnthesis UDP-glucose lipid carrier transferase
K10119	0.243537	0.156157	0.143733	0.20848	minE; cell division topological specificity factor
K10120	0.000268159	0.0172221	0.00050274	0	minD; septum site-determining protein MinD
K10188	0.0392268	0.0697648	0.0718981	0.0236172	minC; septum site-determining protein MinC
K10189	0.0261849	0.0488438	0.0257572	0.0084682	rnfG; Na+-translocating ferredoxin:NAD+ oxidoreductase subunit G
K10190	0.0253381	0.0459428	0.0233186	0.00738786	rnfE; Na+-translocating ferredoxin:NAD+ oxidoreductase subunit E
K10200	0.000301457	0.0532767	0.0149657	0	rnfD; Na+-translocating ferredoxin:NAD+ oxidoreductase subunit D [EC:7.2.1.2]
K10201	0.000288028	0.0366818	0.00524316	0	rnfC; Na+-translocating ferredoxin:NAD+ oxidoreductase subunit C [EC:7.2.1.2]
K10202	0.000132597	0.0362663	0.0167174	0	rnfB; Na+-translocating ferredoxin:NAD+ oxidoreductase subunit B [EC:7.2.1.2]
K10206	0.00754913	0.055601	0.0508608	0.0197408	rnfA; Na+-translocating ferredoxin:NAD+ oxidoreductase subunit A
K10212	0.00034992	0.00401511	0.00387991	0.000271857	plsX; phosphate acyltransferase [EC:2.3.1.274]
K17330	0.00721776	0.000928335	0	0.00313787	greA; transcription elongation factor GreA
K17363	0.0154226	0.106632	0.0181463	0.0147095	nusB; transcription antitermination protein NusB
K17388	5.65549e-05	0.00247522	0.000524642	0	rho; transcription termination factor Rho
K17462	0.000104044	0	0	0	recF; DNA replication and repair protein RecF
K17465	0.00325574	0.00379832	0.0101941	0.00517923	radC; DNA repair protein RadC
K17466	0.00435384	0.00533564	0.016379	0.0071273	recN; DNA repair protein RecN (Recombination protein N)
K17467	0.00479264	0.00620269	0.0182333	0.00836933	moaC, CNX3; cyclic pyranopterin monophosphate synthase [EC:4.6.1.17]
K17491	0.00771612	0.00150084	0	0.0201316	moaA, CNX2; GTP 3',8-cyclase [EC:4.1.99.22]
K17493	0.000433461	0.000385972	0	0	rlpA; rare lipoprotein A
K17551	0.00340723	0	0	0.027865	lipA, LIAS, LIP1, LIP5; lipoyl synthase [EC:2.8.1.8]
K17594	0.000114974	0	0	0	nrdI; protein involved in ribonucleotide reduction
K17603	5.65549e-05	0	0	0	UNG, UDG; uracil-DNA glycosylase [EC:3.2.2.27]
K17675	0.00870069	0.136765	0.019045	0.000259552	mnmE, trmE, MSS1; tRNA modification GTPase [EC:3.6.-.-]
K17677	0.000618503	0.00060176	0	0	cpdA; 3',5'-cyclic-AMP phosphodiesterase [EC:3.1.4.53]
K17686	0.378149	0.38462	0.326625	0.468862	MPG; DNA-3-methyladenine glycosylase [EC:3.2.2.21]
K17716	0.000448499	0.0300876	0.0297237	0.000488985	recQ; ATP-dependent DNA helicase RecQ [EC:3.6.4.12]
K17722	0.0024724	0.000226911	0.0267901	0.00937563	recG; ATP-dependent DNA helicase RecG [EC:3.6.4.12]
K17723	0.0030016	0.0459721	0.0825026	0.0303682	uvrD, pcrA; DNA helicase II / ATP-dependent DNA helicase PcrA [EC:3.6.4.12]
K17751	0.00125899	0.0115054	0.00660122	0.00165303	OGG1; N-glycosylase/DNA lyase [EC:3.2.2.- 4.2.99.18]
K17758	0.0346244	0.00580292	0.000916036	0.0373057	smpB; SsrA-binding protein
K17763	6.54512e-05	0	0	0	hflX; GTPase
K17810	0.0810252	0.0179512	0.0157415	0.0807729	hfq; host factor-I protein
K17816	0.000350047	0	0	0	hslU; ATP-dependent HslUV protease ATP-binding subunit HslU
K17828	0.0740636	0.100521	0.0991336	0.0756851	trxA; thioredoxin 1
K17836	0.0550746	0.113321	0.0558335	0.0390888	rnd; ribonuclease D [EC:3.1.13.5]
K17837	4.96073e-05	0.0555451	0.0148187	0.00127394	rnc, DROSHA, RNT1; ribonuclease III [EC:3.1.26.3]
K17865	0.000234142	0.0162137	0.0286018	0.010485	dnaJ; molecular chaperone DnaJ
K17926	0.000364493	0	0	0	GRPE; molecular chaperone GrpE
K17950	0.0059553	0.00629457	0.0148634	0.0181756	ubiB, aarF; ubiquinone biosynthesis protein
K18009	0.057491	0.00897145	0	0.0535844	pbp1b; penicillin-binding protein 1B
K18037	0.000143993	0	0	0.000561671	clpA; ATP-dependent Clp protease ATP-binding subunit ClpA
K18082	0.000117346	0	0	0	clpB; ATP-dependent Clp protease ATP-binding subunit ClpB
K18104	0.0259812	0.0362256	0.0224572	0.0488325	clpC; ATP-dependent Clp protease ATP-binding subunit ClpC
K18118	0.000496412	0.0343021	0.0190242	0.00126256	clpE; ATP-dependent Clp protease ATP-binding subunit ClpE
K18120	0.0414317	0.0672323	0.0930067	0.0629416	cbf, cbf1; 3'-5' exoribonuclease [EC:3.1.-.-]
K18121	0.000362714	0	0	0.00076957	tlyC; putative hemolysin
K18122	0.000925721	0.0367002	0.191293	0.0554381	recU; recombination protein U
K18151	0.000466377	0.0252002	0.0668567	0.0287949	uvrA; excinuclease ABC subunit A
K18197	0.00460192	0.00584008	0	0.0150432	uvrB; excinuclease ABC subunit B
K18220	0.00442175	0.0665293	0.00590849	0	uvrC; excinuclease ABC subunit C
K18231	0.00642879	0.121463	0.0624034	0.00267121	cspA; cold shock protein
K18234	0.00861249	0.0189148	0.0188096	0.00337811	hrcA; heat-inducible transcriptional repressor
K18332	0.00477789	0.179983	0.179884	0.0370802	codY; transcriptional pleiotropic repressor
K18346	0.0304356	0.0170198	0.0112434	0.000680143	tenA; thiaminase (transcriptional activator TenA) [EC:3.5.99.2]
K18348	5.74445e-05	0.00744792	0.0185064	0.000184434	ctsR; transcriptional regulator of stress and heat shock response
K18349	0.000164369	0.00372146	0.0189243	0.00719741	troR; DtxR family transcriptional regulator, Mn-dependent transcriptional regulator
K18350	0.00051018	0.00636887	0.0297248	0.0112595	K03710; GntR family transcriptional regulator
K18369	0.000312641	0.000536467	0	0	fur, zur, furB; Fur family transcriptional regulator, ferric uptake regulator
K18412	0.00109585	0	0	0	glnR; MerR family transcriptional regulator, glutamine synthetase repressor
K18430	0.00180976	0.0200399	0.0474222	0.0154343	splB; spore photoproduct lyase [EC:4.1.99.14]
K01141	0	0.0111409	0.0135946	0.000402921	asnC; Lrp/AsnC family transcriptional regulator, regulator for asnA, asnC and gidA
K01147	0	0.0170892	0.0179055	0.00107605	lrp; Lrp/AsnC family transcriptional regulator, leucine-responsive regulatory protein
K01150	0	0.00444468	0.007215	0.000273002	dinG; ATP-dependent DNA helicase DinG [EC:3.6.4.12]
K01185	0	0.0303099	0.0504824	0.000351411	mfd; transcription-repair coupling factor (superfamily II helicase) [EC:3.6.4.-]
K01186	0	0.00374437	0.00646339	0	lhr; ATP-dependent helicase Lhr and Lhr-like helicase [EC:3.6.4.-]
K01197	0	0.0731315	0.0169162	0	helY; ATP-dependent RNA helicase HelY [EC:3.6.4.-]
K01233	0	0.0108507	0.00796641	0	xerC; integrase/recombinase XerC
K01255	0	0.0852581	0.0482544	0	apbE; FAD:protein FMN transferase [EC:2.7.1.180]
K01357	0	0.00254708	9.1787e-05	0	eutB; ethanolamine ammonia-lyase large subunit [EC:4.3.1.7]
K01387	0	0.0206225	0.0258595	0	eutC; ethanolamine ammonia-lyase small subunit [EC:4.3.1.7]
K01400	0	0.0552099	0.0342548	0	por, nifJ; pyruvate-ferredoxin/flavodoxin oxidoreductase [EC:1.2.7.1 1.2.7.-]
K01423	0	0.0117333	0.0148823	0.000434184	dltB; membrane protein involved in D-alanine export
K01479	0	0.0122551	0.00848219	0	dltD; D-alanine transfer protein
K01525	0	0.00653827	0.00899105	0.000493778	arsC2, arsC; arsenate reductase (thioredoxin) [EC:1.20.4.4]
K02154	0	0.00239814	0.000618263	0	pncC; nicotinamide-nucleotide amidase [EC:3.5.1.42]
K02193	0	0.00454679	0.00526191	0.000379455	pncC; nicotinamide-nucleotide amidase [EC:3.5.1.42]
K02194	0	0.0038902	0.00627717	0.000252827	lemA; LemA protein
K02195	0	0.00544187	0.00675617	0.000397555	moeA; molybdopterin molybdotransferase [EC:2.10.1.1]
K02196	0	0.00184877	0.00166887	8.24871e-05	mobA; molybdenum cofactor guanylyltransferase [EC:2.7.7.77]
K02197	0	0.00381222	0.00368849	0.000238161	mobB; molybdopterin-guanine dinucleotide biosynthesis adapter protein
K02198	0	0.0129078	0.0148314	0.000429606	potE; putrescine:ornithine antiporter
K02199	0	0.00327731	0.00576414	0.000151453	arcD, lysl, lysP; arginine:ornithine antiporter / lysine permease
K02200	0	0.012665	0.0106471	0.000889545	eptA, pmrC; lipid A ethanolaminephosphotransferase [EC:2.7.8.43]
K02204	0	0.00694505	0.000955155	0.000312278	kgtP; MFS transporter, MHS family, alpha-ketoglutarate permease
K02339	0	0.00322392	0.00460127	0.000235013	proP; MFS transporter, MHS family, proline/betaine transporter
K02379	0	0.0456476	0.0314503	0.000453572	polC; DNA polymerase III subunit alpha, Gram-positive type [EC:2.7.7.7]
K02380	0	0.00605497	0.00960819	0	PPIA; peptidyl-prolyl cis-trans isomerase A (cyclophilin A) [EC:5.2.1.8]
K02398	0	0.00504032	0.00490678	0	PPIB, ppiB; peptidyl-prolyl cis-trans isomerase B (cyclophilin B) [EC:5.2.1.8]
K02415	0	0.00591549	0.0195054	0.00459789	ppiC; peptidyl-prolyl cis-trans isomerase C [EC:5.2.1.8]
K02427	0	0.00515512	0.0084282	0.000311777	ppiD; peptidyl-prolyl cis-trans isomerase D [EC:5.2.1.8]
K18465	0	0.00210115	0.00161519	0	surA; peptidyl-prolyl cis-trans isomerase SurA [EC:5.2.1.8]
K18466	0	0.000321347	0	0	fklB; FKBP-type peptidyl-prolyl cis-trans isomerase FklB [EC:5.2.1.8]
K18468	0	0.00588479	0.00322996	0	slyD; FKBP-type peptidyl-prolyl cis-trans isomerase SlyD [EC:5.2.1.8]
K18469	0	3.88196e-05	0	0.0025194	dld; D-lactate dehydrogenase (quinone) [EC:1.1.5.12]
K18476	0	0.00551739	0.000197123	0	ldhA; D-lactate dehydrogenase [EC:1.1.1.28]
K18783	0	0.0246656	0.0189623	0	ttdA; L(+)-tartrate dehydratase alpha subunit [EC:4.2.1.32]
K18816	0	0.0049965	0.000621319	0	ttdB; L(+)-tartrate dehydratase beta subunit [EC:4.2.1.32]
K00276	0	0	0.0192879	0	katE, CAT, catB, srpA; catalase [EC:1.11.1.6]
K00281	0	0	0.0257054	0	katG; catalase-peroxidase [EC:1.11.1.21]
K00313	0	0	0.0316988	0.00972254	punA, PNP; purine-nucleoside phosphorylase [EC:2.4.2.1]
K00322	0	0	0.0148268	0	deoD; purine-nucleoside phosphorylase [EC:2.4.2.1]
K00359	0	0	0.000311118	0	aroD; 3-dehydroquinate dehydratase I [EC:4.2.1.10]
K00363	0	0	0.003297	0	aroQ, qutE; 3-dehydroquinate dehydratase II [EC:4.2.1.10]
K00381	0	0	0.0153207	0	surE; 5'-nucleotidase [EC:3.1.3.5]
K00424	0	0	0.00131527	0	rimI; [ribosomal protein S18]-alanine N-acetyltransferase [EC:2.3.1.266]
K00427	0	0	0.0157787	0	rimJ; [ribosomal protein S5]-alanine N-acetyltransferase [EC:2.3.1.267]
K00428	0	0	0.0135496	0	E3.4.21.102, prc, ctpA; carboxyl-terminal processing protease [EC:3.4.21.102]
K00457	0	0	0.000656669	0	ftsH, hflB; cell division protease FtsH [EC:3.4.24.-]
K00520	0	0	0.00292873	0	htpX; heat shock protein HtpX [EC:3.4.24.-]
K00529	0	0	0.00977597	0	lplA, lplJ, lipL1; lipoate---protein ligase [EC:6.3.1.20]
K00556	0	0	0.00579164	0	lipB; lipoyl(octanoyl) transferase [EC:2.3.1.181]
K01087	0	0	0.0066979	0	cphA; cyanophycin synthetase [EC:6.3.2.29 6.3.2.30]
K01093	0	0	0.0106193	0	rseC; sigma-E factor negative regulatory protein RseC
K01096	0	0	0.00661314	0	wrbA; NAD(P)H dehydrogenase (quinone) [EC:1.6.5.2]
K01110	0	0	0.000153725	0	mviM; virulence factor
K01133	0	0	0.0288371	0	pnuC; nicotinamide mononucleotide transporter
K01146	0	0	0.00812778	0	modD; molybdenum transport protein [EC:2.4.2.-]
K01160	0	0	0.00635459	0	mtgA; monofunctional glycosyltransferase [EC:2.4.1.129]
K01169	0	0	0.00761944	0	xpt; xanthine phosphoribosyltransferase [EC:2.4.2.22]
K01175	0	0	0.00689971	0	rimL; ribosomal-protein-serine acetyltransferase [EC:2.3.1.-]
K01241	0	0	0.0130028	0	pat; phosphinothricin acetyltransferase [EC:2.3.1.183]
K01252	0	0	0.00741315	0	yiaC; putative acetyltransferase [EC:2.3.1.-]
K01301	0	0	5.70485e-05	0	yjaB; putative acetyltransferase [EC:2.3.1.-]
K01312	0	0	0.00321703	0	yjgM; putative acetyltransferase [EC:2.3.1.-]
K01355	0	0	0.0105409	0	yafP; putative acetyltransferase [EC:2.3.1.-]
K01398	0	0	5.9799e-05	0	tonB; periplasmic protein TonB
K01407	0	0	0.0264222	0	sdaC; serine transporter
K01415	0	0	0.000850226	0	fldA, nifF, isiB; flavodoxin I
K01460	0	0	0.0195035	0	AROA2, aroA; 3-deoxy-7-phosphoheptulonate synthase [EC:2.5.1.54]
K01463	0	0	0.00313227	0	ndh; NADH dehydrogenase [EC:1.6.99.3]
K01483	0	0	0.00361952	0	arsR; ArsR family transcriptional regulator, arsenate/arsenite/antimonite-responsive transcriptional repressor
K01484	0	0	0.010331	0	arsB; arsenical pump membrane protein
K01497	0	0	0.00563914	0	mdaB; NADPH dehydrogenase (quinone) [EC:1.6.5.10]
K01521	0	0	0.00737831	0	moxR; MoxR-like ATPase [EC:3.6.3.-]
K01529	0	0	0.00523349	0	mraZ; MraZ protein
K01577	0	0	0.0158103	0	yvaK; carboxylesterase [EC:3.1.1.1]
K01582	0	0	0.044002	0	pnbA; para-nitrobenzyl esterase [EC:3.1.1.-]
K01584	0	0	0.0220699	0	estA; putative tributyrin esterase [EC:3.1.1.-]
K01598	0	0	0.000548582	0	NDUFV1; NADH dehydrogenase (ubiquinone) flavoprotein 1 [EC:7.1.1.2 1.6.99.3]
K01608	0	0	0.0155487	0	pspA; phage shock protein A
K01612	0	0	0.002775	0	dedA; membrane-associated protein
K01630	0	0	0.00735233	0	ybaK, ebsC; Cys-tRNA(Pro)/Cys-tRNA(Cys) deacylase [EC:3.1.1.-]
K01631	0	0	0.00553411	0	engA, der; GTPase
K01637	0	0	0.0133402	0	engB; GTP-binding protein
K01638	0	0	0.0346752	0	obgE, cgtA, MTG2; GTPase [EC:3.6.5.-]
K01659	0	0	0.00858865	0	murJ, mviN; putative peptidoglycan lipid II flippase
K01668	0	0	0.0205377	0	eutA; ethanolamine utilization protein EutA
K01671	0	0	0.00964955	0	eutH; ethanolamine transporter
K01682	0	0	0.0225007	0	eutJ; ethanolamine utilization protein EutJ
K01690	0	0	0.0142225	0	eutL; ethanolamine utilization protein EutL
K01692	0	0	0.00633493	0	eutM; ethanolamine utilization protein EutM
K01708	0	0	0.0247329	0	eutP; ethanolamine utilization protein EutP
K01716	0	0	0.00561062	0	eutQ; ethanolamine utilization protein EutQ
K01720	0	0	0.012503	0	eutS; ethanolamine utilization protein EutS
K01725	0	0	0.00445243	0	fbp3; fructose-1,6-bisphosphatase III [EC:3.1.3.11]
K01750	0	0	0.00949959	0	glmU; bifunctional UDP-N-acetylglucosamine pyrophosphorylase / Glucosamine-1-phosphate N-acetyltransferase [EC:2.7.7.23 2.3.1.157]
K01766	0	0	0.00956072	0	dnaK, HSPA9; molecular chaperone DnaK
K01782	0	0	0.0191607	0	hscC; molecular chaperone HscC
K01792	0	0	0.00748609	0	dps; starvation-inducible DNA-binding protein
K01816	0	0	0.00742486	0.000563674	flhB2; flagellar biosynthesis protein
K01818	0	0	0.0310556	0	osmC, ohr; lipoyl-dependent peroxidase
K01825	0	0	0.0209688	0	priA; primosomal protein N' (replication factor Y) (superfamily II helicase) [EC:3.6.4.-]
K01837	0	0	9.72881e-05	0	nrdG; anaerobic ribonucleoside-triphosphate reductase activating protein [EC:1.97.1.4]
K01847	0	0	0.0192476	0	pflA, pflC, pflE; pyruvate formate lyase activating enzyme [EC:1.97.1.4]
K01908	0	0	0.0148796	1.8243e-05	pflX; putative pyruvate formate lyase activating enzyme [EC:1.97.1.4]
K01920	0	0	0.00842576	0	adhE; acetaldehyde dehydrogenase / alcohol dehydrogenase [EC:1.2.1.10 1.1.1.1]
K01971	0	0	0.01879	0	divIVA; cell division initiation protein
K01975	0	0	0.00608891	0	tilS, mesJ; tRNA(Ile)-lysidine synthase [EC:6.3.4.19]
K06968	0	0	0.0098974	0	lonB; ATP-dependent Lon protease [EC:3.4.21.53]
K08878	0	0	0.000534626	0	groEL, HSPD1; chaperonin GroEL
K08970	0	0	0.00705303	0	groES, HSPE1; chaperonin GroES
K08976	0	0	0.000157087	0	HSP90A, htpG; molecular chaperone HtpG
K08989	0	0	0.00420651	0	hslO; molecular chaperone Hsp33
K08990	0	0	0.00747733	0	dsbD; thiol:disulfide interchange protein DsbD [EC:1.8.1.8]
K08992	0	0	0.00235651	0	clpL; ATP-dependent Clp protease ATP-binding subunit ClpL
K08993	0	0	0.00299994	0	tyrA1; chorismate mutase [EC:5.4.99.5]
K08994	0	0	0.0074542	0	trmFO, gid; methylenetetrahydrofolate--tRNA-(uracil-5-)-methyltransferase [EC:2.1.1.74]
K08997	0	0	0.0111057	0	fic; cell filamentation protein
K09000	0	0	0.00147715	0	smf; DNA processing protein
K09016	0	0	0.00939538	0	ADRA2A; adrenergic receptor alpha-2A
K09017	0	0	0.00600201	0	ADRA2C; adrenergic receptor alpha-2C
K09018	0	0	0.00923146	0	DRD3; dopamine receptor D3
K09019	0	0	0.00495751	0	HTR4; 5-hydroxytryptamine receptor 4
K09020	0	0	0.00575742	0	OLFR; olfactory receptor
K09021	0	0	0.00245859	0	PTGER3; prostaglandin E receptor 3
K09023	0	0	0.00618609	0	MAP3K7, TAK1; mitogen-activated protein kinase kinase kinase 7 [EC:2.7.11.25]
K09024	0	0	0.0036888	0	IKBKA, IKKA, CHUK; inhibitor of nuclear factor kappa-B kinase subunit alpha [EC:2.7.11.10]
K09131	0	0	0.00294034	0	ycdX; putative hydrolase
K09133	0	0	0.000426539	0	radA, sms; DNA repair protein RadA/Sms
K09138	0	0	0.00860872	0	E3.1.3.15B; histidinol-phosphatase (PHP family) [EC:3.1.3.15]
K09159	0	0	0.00251166	0	iscS, NFS1; cysteine desulfurase [EC:2.8.1.7]
K09160	0	0	0.00373983	0	iscU, nifU; nitrogen fixation protein NifU and related proteins
K09161	0	0	0.00518326	0	AROA1, aroA; chorismate mutase [EC:5.4.99.5]
K09181	0	0	0.0246208	0	tyrA2; prephenate dehydrogenase [EC:1.3.1.12]
K09377	0	0	1.67071e-05	0	pheA2; prephenate dehydratase [EC:4.2.1.51]
K09456	0	0	0.0147643	0	GNB1; guanine nucleotide-binding protein G(I)/G(S)/G(T) subunit beta-1
K09470	0	0	0.0121046	0	flhG, fleN; flagellar biosynthesis protein FlhG
K09471	0	0	0.00876275	0	SOD2; superoxide dismutase, Fe-Mn family [EC:1.15.1.1]
K09472	0	0	0.0108757	0	KARS, lysS; lysyl-tRNA synthetase, class II [EC:6.1.1.6]
K09473	0	0	0.00539047	0	NEFL, NF-L; neurofilament light polypeptide
K09475	0	0	0.0109225	0	IFT57, HIPPI, ESRRBL1; intraflagellar transport protein 57
K09476	0	0	0.0108861	0	hypC; hydrogenase expression/formation protein HypC
K09477	0	0	0.0133033	0	hypE; hydrogenase expression/formation protein HypE
K09612	0	0	0.0109732	0	hypF; hydrogenase maturation protein HypF
K09763	0	0	0.000154133	0	THBS2S; thrombospondin 2/3/4/5
K09780	0	0	0.00287555	0	BMP5; bone morphogenetic protein 5
K09781	0	0	0.00735875	0	PIAS1; E3 SUMO-protein ligase PIAS1 [EC:2.3.2.-]
K09794	0	0	0.00223416	0	cobD; threonine-phosphate decarboxylase [EC:4.1.1.81]
K09799	0	0	0.00110613	0.00070275	rsbV; anti-sigma B factor antagonist
K09802	0	0	0.00307777	0	phnB; PhnB protein
K09803	0	0	0.00336973	0	glnB; nitrogen regulatory protein P-II 1
K09806	0	0	0.00319044	0	rsbW; serine/threonine-protein kinase RsbW [EC:2.7.11.1]
K09823	0	0	0.00556844	0	feoA; ferrous iron transport protein A
K09824	0	0	0.00921659	0	feoB; ferrous iron transport protein B
K09857	0	0	0.00498512	0	greB; transcription elongation factor GreB
K09890	0	0	0.00312605	0	oxyR; LysR family transcriptional regulator, hydrogen peroxide-inducible genes activator
K09891	0	0	0.00616786	0	hslR; ribosome-associated heat shock protein Hsp15
K09892	0	0	0.00229192	0	xerD; integrase/recombinase XerD
K09893	0	0	0.00443919	0	acuB; acetoin utilization protein AcuB
K09894	0	0	0.00507986	0	spoVT; AbrB family transcriptional regulator, stage V sporulation protein T
K09895	0	0	0.00560644	0	degP, htrA; serine protease Do [EC:3.4.21.107]
K09896	0	0	0.00285905	0	sppA; protease IV [EC:3.4.21.-]
K09897	0	0	0.00412012	0	pchB; isochorismate pyruvate lyase [EC:4.2.99.21]
K09898	0	0	0.00204111	0	PTH2; peptidyl-tRNA hydrolase, PTH2 family [EC:3.1.1.29]
K09899	0	0	0.00478637	0	FEN1, RAD2; flap endonuclease-1 [EC:3.-.-.-]
K09900	0	0	0.0034278	0	HTR3; 5-hydroxytryptamine receptor 3
K09901	0	0	0.00273782	0	ycjT; hypothetical glycosyl hydrolase [EC:3.2.1.-]
K09902	0	0	0.00245309	0	odh; opine dehydrogenase [EC:1.5.1.28]
K09904	0	0	0.00268362	0	ITPR3; inositol 1,4,5-triphosphate receptor type 3
K09906	0	0	0.00517348	0	opuD, betL; glycine betaine transporter
K09907	0	0	0.00470803	0	NMUR2; neuromedin U receptor 2
K09908	0	0	0.00464792	0	LIFR, CD118; leukemia inhibitory factor receptor
K09909	0	0	0.00570424	0	MUSK; muscle, skeletal, receptor tyrosine kinase [EC:2.7.10.1]
K09910	0	0	0.0031394	0	E1.1.1.65; pyridoxine 4-dehydrogenase [EC:1.1.1.65]
K09911	0	0	0.00425246	0	phnX; phosphonoacetaldehyde hydrolase [EC:3.11.1.1]
K09912	0	0	0.00475652	0	cggR; central glycolytic genes regulator
K09914	0	0	0.00533791	0	fer; ferredoxin
K09915	0	0	0.00502159	0	lrgA; holin-like protein
K09916	0	0	0.002628	0	lrgB; holin-like protein LrgB
K09917	0	0	0.00162863	0	glcU; glucose uptake protein
K09918	0	0	0.00242802	0	E2.4.1.4; amylosucrase [EC:2.4.1.4]
K09920	0	0	0.0045216	0	E2.4.1.64; alpha,alpha-trehalose phosphorylase [EC:2.4.1.64]
K09921	0	0	0.00734061	0	treS; maltose alpha-D-glucosyltransferase / alpha-amylase [EC:5.4.99.16 3.2.1.1]
K09923	0	0	0.00356614	0	deoR; deoxyribonucleoside regulator
K09925	0	0	0.00622725	0	bglX; beta-glucosidase [EC:3.2.1.21]
K09933	0	0	0.00786658	0	bglB; beta-glucosidase [EC:3.2.1.21]
K09934	0	0	0.00663932	0	E1.1.1.9; D-xylulose reductase [EC:1.1.1.9]
K09937	0	0	0.00194107	0	tarJ; ribitol-5-phosphate 2-dehydrogenase (NADP+) [EC:1.1.1.405]
K09954	0	0	0.00230242	0	murM; serine/alanine adding enzyme [EC:2.3.2.10]
K09978	0	0	0.0025519	0	pbpA; penicillin-binding protein A
K09979	0	0	0.00487418	0	mrcA; penicillin-binding protein 1A [EC:2.4.1.129 3.4.16.4]
K09980	0	0	0.00535889	0	cytR; LacI family transcriptional regulator, repressor for deo operon, udp, cdd, tsx, nupC, and nupG
K09994	0	0	0.00412552	0	mrdA; penicillin-binding protein 2 [EC:3.4.16.4]
K09996	0	0	0.00771479	0	cbpA; curved DNA-binding protein
K09997	0	0	0.0063168	0	pfpI; protease I [EC:3.5.1.124]
K09998	0	0	0.0054572	0	ftsB; cell division protein FtsB
K09999	0	0	0.00581161	0	deaD, cshA; ATP-dependent RNA helicase DeaD [EC:3.6.4.13]
K10000	0	0	0.00692365	0	marC; multiple antibiotic resistance protein
K10011	0	0	0.0181976	0	iciA; LysR family transcriptional regulator, chromosome initiation inhibitor
K10012	0	0	0.00835608	0	hcp; hydroxylamine reductase [EC:1.7.99.1]
K10013	0	0	0.00757461	0	hisN; histidinol-phosphatase [EC:3.1.3.15]
K10014	0	0	0.00679254	0	MCEE, epi; methylmalonyl-CoA/ethylmalonyl-CoA epimerase [EC:5.1.99.1]
K10015	0	0	0.00687801	0	RERE; arginine-glutamic acid dipeptide repeats protein
K10016	0	0	0.00625628	0	PTPRB, PTPB; receptor-type tyrosine-protein phosphatase beta [EC:3.1.3.48]
K10017	0	0	0.00723059	0	PTPRF, LAR; receptor-type tyrosine-protein phosphatase F [EC:3.1.3.48]
K10108	0	0	0.0109071	0	ARHGAP35, GRLF1; glucocorticoid receptor DNA-binding factor 1
K10109	0	0	0.0151455	0	WASF2; WAS protein family, member 2
K10110	0	0	0.00838715	0	NCKAP1, NAP125; NCK-associated protein 1
K10111	0	0	0.00952302	0	TSPO, BZRP; translocator protein
K10124	0	0	0.0167756	0	NR3C1, GR; glucocorticoid receptor
K10192	0	0	0.0544905	0.00134991	modF; molybdate transport system ATP-binding protein
K10193	0	0	0.0494191	0.000663474	phnL; alpha-D-ribose 1-methylphosphonate 5-triphosphate synthase subunit PhnL [EC:2.7.8.37]
K10194	0	0	0.0420915	0.00087216	phnK; putative phosphonate transport system ATP-binding protein
K10210	0	0	0.000616124	0	rarD; chloramphenicol-sensitive protein RarD
K10211	0	0	0.000388643	0	terC; tellurite resistance protein TerC
K11891	0	0	0.0315812	0	pdhR; GntR family transcriptional regulator, transcriptional repressor for pyruvate dehydrogenase complex
K11904	0	0	0.0228732	0	djlA; DnaJ like chaperone protein
K11907	0	0	0.0189188	0	bamD; outer membrane protein assembly factor BamD
K11909	0	0	0.00591073	0	yhbH; putative sigma-54 modulation protein
K11910	0	0	0.0122997	0	yfiH; polyphenol oxidase [EC:1.10.3.-]
K11911	0	0	0.0120923	0	yfiP; DTW domain-containing protein
K11921	0	0	0.00829169	0	ugpB; sn-glycerol 3-phosphate transport system substrate-binding protein
K11924	0	0	0.00447474	0	ugpA; sn-glycerol 3-phosphate transport system permease protein
K11925	0	0	0.0153867	0	ugpE; sn-glycerol 3-phosphate transport system permease protein
K11926	0	0	0.00449715	0	ugpC; sn-glycerol 3-phosphate transport system ATP-binding protein [EC:7.6.2.10]
K11929	0	0	0.0107677	0	dapH, dapD; tetrahydrodipicolinate N-acetyltransferase [EC:2.3.1.89]
K11931	0	0	0.0201599	0	dapL; N-acetyldiaminopimelate deacetylase [EC:3.5.1.47]
K11932	0	0	0.00450948	0	LYSN; 2-aminoadipate transaminase [EC:2.6.1.-]
K11933	0	0	0.00799402	0	ABC.X4.P; putative ABC transport system permease protein
K11934	0	0	0.00565524	0	ABC.X4.A; putative ABC transport system ATP-binding protein
K11935	0	0	0.0226222	0	rodA, mrdB; rod shape determining protein RodA
K11938	0	0	0.00914997	0	ybbN; putative thioredoxin
K11940	0	0	0.00250443	0	opuC; osmoprotectant transport system substrate-binding protein
K11941	0	0	0.0118703	0	opuBD; osmoprotectant transport system permease protein
K12112	0	0	0.00496556	0	opuA; osmoprotectant transport system ATP-binding protein [EC:7.6.2.9]
K12113	0	0	0.010317	0	ATP2A; P-type Ca2+ transporter type 2A [EC:7.2.2.10]
K12136	0	0	0.00624304	0	dhaK; phosphoenolpyruvate---glycerone phosphotransferase subunit DhaK [EC:2.7.1.121]
K12137	0	0	0.0160627	0	dhaL; phosphoenolpyruvate---glycerone phosphotransferase subunit DhaL [EC:2.7.1.121]
K12138	0	0	0.00802998	0	dhaM; phosphoenolpyruvate---glycerone phosphotransferase subunit DhaM [EC:2.7.1.121]
K12139	0	0	0.0129937	0	cobK-cbiJ; precorrin-6A/cobalt-precorrin-6A reductase [EC:1.3.1.54 1.3.1.106]
K12140	0	0	0.00653195	0	scpA; segregation and condensation protein A
K12141	0	0	0.0152589	0	doxDA; thiosulfate dehydrogenase (quinone) [EC:1.8.5.2]
K12142	0	0	0.0138913	0	hmp, YHB1; nitric oxide dioxygenase [EC:1.14.12.17]
K12143	0	0	0.00450265	0	dfx; superoxide reductase [EC:1.15.1.2]
K12144	0	0	0.00584859	0	E2.1.1.131, cobJ, cbiH; precorrin-3B C17-methyltransferase [EC:2.1.1.131]
K12145	0	0	0.00405869	0	cobM, cbiF; precorrin-4/cobalt-precorrin-4 C11-methyltransferase [EC:2.1.1.133 2.1.1.271]
K12146	0	0	0.0196965	0	K05937; uncharacterized protein
K12147	0	0	0.00325024	0	E2.3.3.3; citrate (Re)-synthase [EC:2.3.3.3]
K12148	0	0	0.00237118	0	tagA, tarA; N-acetylglucosaminyldiphosphoundecaprenol N-acetyl-beta-D-mannosaminyltransferase [EC:2.4.1.187]
K12149	0	0	0.00260752	0	citX; holo-ACP synthase [EC:2.7.7.61]
K12151	0	0	0.00233196	0	citG; triphosphoribosyl-dephospho-CoA synthase [EC:2.4.2.52]
K12152	0	0	0.00379872	0	K05967; uncharacterized protein
K12177	0	0	2.15969e-05	0	SIAE; sialate O-acetylesterase [EC:3.1.1.53]
K12240	0	0	0.0168934	0	comB; 2-phosphosulfolactate phosphatase [EC:3.1.3.71]
K12262	0	0	0.0048264	0	rnmV; ribonuclease M5 [EC:3.1.26.8]
K12264	0	0	0.0135768	0	dexA; dextranase [EC:3.2.1.11]
K12265	0	0	0.010058	0	ramA; alpha-L-rhamnosidase [EC:3.2.1.40]
K12266	0	0	0.0122656	0	pepE; dipeptidase E [EC:3.4.13.21]
K12288	0	0	0.00725728	0	trpB; tryptophan synthase beta chain [EC:4.2.1.20]
K12289	0	0	0.00482233	0	gpr; spore protease [EC:3.4.24.78]
K12290	0	0	0.00329424	0	E3.5.1.81; N-acyl-D-amino-acid deacylase [EC:3.5.1.81]
K12291	0	0	0.00367545	0	pydC; beta-ureidopropionase / N-carbamoyl-L-amino-acid hydrolase [EC:3.5.1.6 3.5.1.87]
K12299	0	0	0.0132596	0	ppaX; pyrophosphatase PpaX [EC:3.6.1.1]
K12331	0	0	0.00072472	0	hprK, ptsK; HPr kinase/phosphorylase [EC:2.7.11.- 2.7.4.-]
K12339	0	0	0.00791619	0	scpB; segregation and condensation protein B
K12367	0	0	2.65887e-05	0	ychN; uncharacterized protein involved in oxidation of intracellular sulfur
K12368	0	0	0.0162741	0	kdsD, kpsF; arabinose-5-phosphate isomerase [EC:5.3.1.13]
K12369	0	0	0.00963977	0	cobH-cbiC; precorrin-8X/cobalt-precorrin-8 methylmutase [EC:5.4.99.61 5.4.99.60]
K12370	0	0	0.00738258	0	PRKCI; atypical protein kinase C iota type [EC:2.7.11.13]
K12371	0	0	0.00944774	0	EXOC4, SEC8; exocyst complex component 4
K12372	0	0	0.00972921	0	abnA; arabinan endo-1,5-alpha-L-arabinosidase [EC:3.2.1.99]
K12500	0	0	0.00362594	0	E3.1.3.21; glycerol-1-phosphatase [EC:3.1.3.21]
K12507	0	0	0.0219139	8.05555e-05	clsA_B; cardiolipin synthase A/B [EC:2.7.8.-]
K12510	0	0	0.0121662	0	LYS5, acpT; 4'-phosphopantetheinyl transferase [EC:2.7.8.-]
K12516	0	0	0.0552943	0	hlpA, ompH; outer membrane protein
K12518	0	0	0.0225921	0	ABCB-BAC; ATP-binding cassette, subfamily B, bacterial
K12519	0	0	0.00740377	0	bacA; undecaprenyl-diphosphatase [EC:3.6.1.27]
K12525	0	0	0.0237482	0	gntT; Gnt-I system high-affinity gluconate transporter
K12528	0	0	0.0282071	0	gntU; Gnt-I system low-affinity gluconate transporter
K12529	0	0	0.00821091	0	ABCF3; ATP-binding cassette, subfamily F, member 3
K12582	0	0	0.0111013	0	phnJ; alpha-D-ribose 1-methylphosphonate 5-phosphate C-P lyase [EC:4.7.1.1]
K12660	0	0	0.00698518	0	phnI; alpha-D-ribose 1-methylphosphonate 5-triphosphate synthase subunit PhnI [EC:2.7.8.37]
K12661	0	0	0.0193639	0	phnH; alpha-D-ribose 1-methylphosphonate 5-triphosphate synthase subunit PhnH [EC:2.7.8.37]
K12687	0	0	0.0392802	0	phnP; phosphoribosyl 1,2-cyclic phosphate phosphodiesterase [EC:3.1.4.55]
K12734	0	0	0.000143029	0	miaB; tRNA-2-methylthio-N6-dimethylallyladenosine synthase [EC:2.8.4.3]
K12943	0	0	0.00708084	0	truA, PUS1; tRNA pseudouridine38-40 synthase [EC:5.4.99.12]
K12944	0	0	0.00482029	0	rluA; tRNA pseudouridine32 synthase / 23S rRNA pseudouridine746 synthase [EC:5.4.99.28 5.4.99.29]
K12945	0	0	0.0055065	0	rluB; 23S rRNA pseudouridine2605 synthase [EC:5.4.99.22]
K12957	0	0	0.0091027	0	rluC; 23S rRNA pseudouridine955/2504/2580 synthase [EC:5.4.99.24]
K12961	0	0	0.00617693	0	rluD; 23S rRNA pseudouridine1911/1915/1917 synthase [EC:5.4.99.23]
K12962	0	0	0.00277358	0	rluE; 23S rRNA pseudouridine2457 synthase [EC:5.4.99.20]
K12963	0	0	0.00345571	0	rluF; 23S rRNA pseudouridine2604 synthase [EC:5.4.99.21]
K12972	0	0	0.00754334	0	rsuA; 16S rRNA pseudouridine516 synthase [EC:5.4.99.19]
K12974	0	0	0.00771194	0	recR; recombination protein RecR
K12975	0	0	0.0178389	0	aqpZ; aquaporin Z
K12981	0	0	0.0104769	0	nrdH; glutaredoxin-like protein NrdH
K13014	0	0	0.00875592	0	phnA; protein PhnA
K13053	0	0	0.00503545	0	ccdA; cytochrome c-type biogenesis protein
K13069	0	0	0.030144	0	coiA; competence protein CoiA
K13170	0	0	0.00466494	0	crcB, FEX; fluoride exporter
K13177	0	0	0.000527699	0	cstA; carbon starvation protein
K13181	0	0	0.000182148	0.0127236	cutC; copper homeostasis protein
K13255	0	0	0.00791507	0	sfsA; sugar fermentation stimulation protein A
K13283	0	0	0.00810822	0	typA, bipA; GTP-binding protein
K13301	0	0	0.00560288	0	pheB; chorismate mutase [EC:5.4.99.5]
K13356	0	0	0.00317424	0	mgtE; magnesium transporter
K13381	0	0	0.0281077	0	pdxS, pdx1; pyridoxal 5'-phosphate synthase pdxS subunit [EC:4.3.3.6]
K13480	0	0	0.00432743	0	rbsU; putative ribose uptake protein
K13483	0	0	0.0059255	0	phoH, phoL; phosphate starvation-inducible protein PhoH and related proteins
K13497	0	0	0.0123392	0	relE, stbE; mRNA interferase RelE/StbE
K13498	0	0	0.0106611	0	dkgA; 2,5-diketo-D-gluconate reductase A [EC:1.1.1.346]
K13503	0	0	0.00384578	0	dam; DNA adenine methylase [EC:2.1.1.72]
K13574	0	0	0.00991859	0	LRP2; low density lipoprotein-related protein 2
K13620	0	0	0.0114274	0	COL4A; collagen, type IV, alpha
K13629	0	0	0.0130192	0	TN; tenascin
K13630	0	0	0.00206077	0	ZYX; zyxin
K13631	0	0	0.00355157	0	hyaA, hybO; hydrogenase small subunit [EC:1.12.99.6]
K13632	0	0	0.00304568	0	spoIIID; putative DeoR family transcriptional regulator, stage III sporulation protein D
K13634	0	0	0.00917931	0	abrB; AbrB family transcriptional regulator, transcriptional pleiotropic regulator of transition state genes
K13635	0	0	0.00851591	0	ezrA; septation ring formation regulator
K13636	0	0	0.0090159	0	maf; septum formation protein
K13637	0	0	0.00427008	0	gerKA; spore germination protein KA
K13638	0	0	0.00472158	0	gerKB; spore germination protein KB
K13639	0	0	0.00478474	0	gerKC; spore germination protein KC
K13641	0	0	0.00763777	0	yaaH; spore germination protein
K13651	0	0	0.00377926	0	yndD; spore germination protein
K13655	0	0	0.00512173	0	bofA; inhibitor of the pro-sigma K processing machinery
K13683	0	0	0.00618222	0	cotJB; spore coat protein JB
K13684	0	0	0.00974694	0	cotJC; spore coat protein JC
K13694	0	0	0.00549734	0	jag; spoIIIJ-associated protein
K13695	0	0	0.00379831	0	kipA; antagonist of KipI
K13821	0	0	0.0325209	0	kipI; inhibitor of KinA
K13888	0	0	0.0090432	0	spmA; spore maturation protein A
K13890	0	0	0.0119056	0	spmB; spore maturation protein B
K13891	0	0	0.0108044	0	spoIIAA; stage II sporulation protein AA (anti-sigma F factor antagonist)
K13892	0	0	0.0155009	0	spoIIAB; stage II sporulation protein AB (anti-sigma F factor) [EC:2.7.11.1]
K13893	0	0	0.0153202	0	spoIID; stage II sporulation protein D
K13894	0	0	0.010153	0	spoIIE; stage II sporulation protein E [EC:3.1.3.16]
K13895	0	0	0.00774861	0	spoIIGA; stage II sporulation protein GA (sporulation sigma-E factor processing peptidase) [EC:3.4.23.-]
K13896	0	0	0.0133323	0	spoIIM; stage II sporulation protein M
K13918	0	0	0.01212	0	spoIIP; stage II sporulation protein P
K13926	0	0	0.024671	0.00844202	spoIIR; stage II sporulation protein R
K13938	0	0	0.00624997	0	spoIIIAA; stage III sporulation protein AA
K14051	0	0	0.0173637	0	spoIIIAB; stage III sporulation protein AB
K14052	0	0	0.00958313	0	spoIIIAC; stage III sporulation protein AC
K14053	0	0	0.00837991	0	spoIIIAD; stage III sporulation protein AD
K14054	0	0	0.00562131	0	spoIIIAE; stage III sporulation protein AE
K14055	0	0	0.00875093	0	spoIIIAG; stage III sporulation protein AG
K14056	0	0	0.00439834	0	spoIIIAH; stage III sporulation protein AH
K14057	0	0	0.00732177	0	spoIVA; stage IV sporulation protein A
K14060	0	0	0.0112739	0	spoIVB; stage IV sporulation protein B [EC:3.4.21.116]
K14061	0	0	0.00388867	0	spoVAC; stage V sporulation protein AC
K14062	0	0	0.023885	0	spoVAD; stage V sporulation protein AD
K14063	0	0	0.00781045	0	spoVAE; stage V sporulation protein AE
K14064	0	0	0.00413551	0	spoVAF; stage V sporulation protein AF
K14086	0	0	0.0262123	0	spoVB; stage V sporulation protein B
K14088	0	0	0.001828	0	spoVFA; dipicolinate synthase subunit A
K14089	0	0	0.00525478	0	spoVFB; dipicolinate synthase subunit B
K14090	0	0	0.0151992	0	spoVG; stage V sporulation protein G
K14207	0	0	2.97467e-05	0	spoVR; stage V sporulation protein R
K14287	0	0	0.0106087	0	spoVS; stage V sporulation protein S
K14347	0	0	0.00875205	0	yabG; spore coat assemly protein
K14348	0	0	0.00804404	0	yqfD; similar to stage IV sporulation protein
K14376	0	0	0.00566624	0.00293799	tlyA; 23S rRNA (cytidine1920-2'-O)/16S rRNA (cytidine1409-2'-O)-methyltransferase [EC:2.1.1.226 2.1.1.227]
K14393	0	0	0.0149384	0	ITGAV, CD51; integrin alpha V
K14588	0	0	0.0156549	0	ITGB3, CD61; integrin beta 3
K14682	0	0	0.0121192	0	cidA; holin-like protein
K14684	0	0	0.00304486	0.00283876	flaG; flagellar protein FlaG
K14744	0	0	0.0120787	0	iolH; myo-inositol catabolism protein IolH
K14762	0	0	0.00397659	0	iolI; 2-keto-myo-inositol isomerase [EC:5.3.99.11]
K14963	0	0	0.000174507	0	iolR; DeoR family transcriptional regulator, myo-inositol catabolism operon repressor
K15048	0	0	0.00180752	0.00477724	iolT; MFS transporter, SP family, major inositol transporter
K15133	0	0	0.000136	0	iolF; MFS transporter, SP family, inositol transporter
K15193	0	0	0.00116817	0	rbsD; D-ribose pyranase [EC:5.4.99.62]
K15256	0	0	0.00639503	0	CDH23, USH1D; cadherin 23
K15257	0	0	0.00846854	0	lptB; lipopolysaccharide export system ATP-binding protein [EC:3.6.3.-]
K15268	0	0	0.0062734	0	larE; pyridinium-3,5-biscarboxylic acid mononucleotide sulfurtransferase [EC:4.4.1.37]
K15361	0	0	0.00300523	0	K06871; uncharacterized protein
K15383	0	0	9.07682e-05	0	K06872; uncharacterized protein
K15396	0	0	0.00722896	0	K06878; tRNA-binding protein
K21021	0	0	0.0129291	0	nrnA; bifunctional oligoribonuclease and PAP phosphatase NrnA [EC:3.1.3.7 3.1.13.3]
K21084	0	0	0.0294719	0	K06885; uncharacterized protein
K21085	0	0	0.0135247	0	K06888; uncharacterized protein
K21086	0	0	0.00737026	0	K06889; uncharacterized protein
K21087	0	0	0.00578757	0	K06890; uncharacterized protein
K21088	0	0	0.0116847	0	clpS; ATP-dependent Clp protease adaptor protein ClpS
K21089	0	0	0.00656445	0	lysE, argO; L-lysine exporter family protein LysE/ArgO
K21090	0	0	0.0135694	0	mapP; maltose 6'-phosphate phosphatase [EC:3.1.3.90]
K21108	0	0	0.00606385	0	K06897; 7,8-dihydropterin-6-yl-methyl-4-(beta-D-ribofuranosyl)aminobenzene 5'-phosphate synthase [EC:2.5.1.105]
K21252	0	0	0.00080092	0	larB; pyridinium-3,5-biscarboxylic acid mononucleotide synthase [EC:2.5.1.143]
K21278	0	0	0.00213494	0	pbuG; putative MFS transporter, AGZA family, xanthine/uracil permease
K21393	0	0	0.0167184	0	UMF1; MFS transporter, UMF1 family
K21394	0	0	0.00759662	0	K06904; uncharacterized protein
K21395	0	0	0.0150425	0	K06907; uncharacterized protein
K21430	0	0	0.00988936	0	xtmB; phage terminase large subunit
K21444	0	0	6.94769e-05	0	K06915; uncharacterized protein
K21511	0	0	0.010475	0	K06919; putative DNA primase/helicase
K21512	0	0	0.0295919	0	queC; 7-cyano-7-deazaguanine synthase [EC:6.3.4.20]
K21602	0	0	0.00835699	0	K06923; uncharacterized protein
K21645	0	0	0.00880095	0	tsaE; tRNA threonylcarbamoyladenosine biosynthesis protein TsaE
K21695	0	0	0.00238758	0	K06929; uncharacterized protein
K21698	0	0	0.00906653	0	K06937; 7,8-dihydro-6-hydroxymethylpterin dimethyltransferase [EC:2.1.1.-]
K21739	0	0	0.013125	0	K06940; uncharacterized protein
K21741	0	0	0.00679712	0	rlmN; 23S rRNA (adenine2503-C2)-methyltransferase [EC:2.1.1.192]
K21742	0	0	0.00841812	0	ychF; ribosome-binding ATPase
K21746	0	0	0.00784162	0	yqeH; 30S ribosome assembly GTPase
K21759	0	0	0.000486644	0	rsgA, engC; ribosome biogenesis GTPase / thiamine phosphate phosphatase [EC:3.6.1.- 3.1.3.100]
K21863	0	0	2.88299e-05	0	K06950; uncharacterized protein
K21908	0	0	0.00682035	0	K06956; uncharacterized protein
K21948	0	0	0.0172625	0	rapZ; RNase adapter protein RapZ
K21964	0	0	0.00651392	0	tex; protein Tex
K21965	0	0	0.0065889	0	K06960; uncharacterized protein
K21966	0	0	0.0238658	0	K06962; uncharacterized protein
K21967	0	0	0.0148936	0	trmK; tRNA (adenine22-N1)-methyltransferase [EC:2.1.1.217]
K21968	0	0	0.00699965	0	rlmI; 23S rRNA (cytosine1962-C5)-methyltransferase [EC:2.1.1.191]
K21972	0	0	0.00720105	0	PITRM1, PreP, CYM1; presequence protease [EC:3.4.24.-]
K21973	0	0	0.0116439	0	K06973; uncharacterized protein
K21974	0	0	0.00229753	0	K06975; uncharacterized protein
K21976	0	0	0.00387991	0	K06978; uncharacterized protein
K21977	0	0	0.000412888	0	mph; macrolide phosphotransferase
K22014	0	0	0.00840396	0	K06987; uncharacterized protein
K22041	0	0	0.00581834	0	fno; 8-hydroxy-5-deazaflavin:NADPH oxidoreductase [EC:1.5.1.40]
K22051	0	0	0.0284867	0	MEMO1; MEMO1 family protein
K22104	0	0	0.00798536	0	K06993; ribonuclease H-related protein
K22105	0	0	0.00689645	0	K06994; putative drug exporter of the RND superfamily
K22110	0	0	0.00882856	0	yggS, PROSC; PLP dependent protein
K22130	0	0	0.00916178	0	K06999; phospholipase/carboxylesterase
K22131	0	0	0.00777489	0	K07000; uncharacterized protein
K22136	0	0	0.000133351	0	K07001; NTE family protein
K22214	0	0	0.0139815	0	K07002; uncharacterized protein
K22293	0	0	0.0045432	0	K07003; uncharacterized protein
K22396	0	0	0.00461909	0.00111361	K07005; uncharacterized protein
K22443	0	0	0.00935035	0	K07006; uncharacterized protein
K22444	0	0	0.00836484	0	gatD; lipid II isoglutaminyl synthase (glutamine-hydrolysing) [EC:6.3.5.13]
K22486	0	0	0.0195967	0	K07010; putative glutamine amidotransferase
K22505	0	0	0.0106663	0	cas3; CRISPR-associated endonuclease/helicase Cas3 [EC:3.1.-.- 3.6.4.-]
K22507	0	0	0.00889182	0	K07014; uncharacterized protein
K22508	0	0	0.0031124	0	K07015; uncharacterized protein
K22509	0	0	0.00914222	0	K07023; putative hydrolases of HD superfamily
K22510	0	0	0.0150514	0	K07025; putative hydrolase of the HAD superfamily
K22650	0	0	0.00638077	0	K07027; glycosyltransferase 2 family protein
K22720	0	0	0.00198763	0	dagK; diacylglycerol kinase (ATP) [EC:2.7.1.107]
K22900	0	0	0.00599182	0	K07030; uncharacterized protein
K22933	0	0	0.0185876	0	K07032; uncharacterized protein
K23007	0	0	0.00924593	0	K07035; uncharacterized protein
K23015	0	0	0.00922637	0	pgpH; cyclic-di-AMP phosphodiesterase PgpH [EC:3.1.4.-]
K23016	0	0	0.0133467	0	K07038; inner membrane protein
K23098	0	0	0.00159726	0	K07040; uncharacterized protein
K23120	0	0	0.000157393	0	ybeY, yqfG; probable rRNA maturation factor
K23123	0	0	0.00472351	0	K07043; uncharacterized protein
K23124	0	0	0.00807786	0	K07045; uncharacterized protein
K23144	0	0	0.00207504	0	PTER, php; phosphotriesterase-related protein
K23181	0	0	0.00759071	0	K07052; uncharacterized protein
K23182	0	0	0.00740968	0	E3.1.3.97; 3',5'-nucleoside bisphosphate phosphatase [EC:3.1.3.97]
K23183	0	0	0.00865568	0	rsmI; 16S rRNA (cytidine1402-2'-O)-methyltransferase [EC:2.1.1.198]
K23184	0	0	0.00672622	0	K07058; membrane protein
K23185	0	0	0.00803233	0	fitB; toxin FitB [EC:3.1.-.-]
K23186	0	0	0.00792393	0	disA; diadenylate cyclase [EC:2.7.7.85]
K23187	0	0	0.00775534	0	K07069; uncharacterized protein
K23188	0	0	0.00686181	0	K07071; uncharacterized protein
K23227	0	0	0.00817841	0	K07075; uncharacterized protein
K23228	0	0	0.015075	0	K07078; uncharacterized protein
K23237	0	0	0.00965271	0	K07079; uncharacterized protein
K23238	0	0	0.00940842	0	K07080; uncharacterized protein
K23239	0	0	0.00254019	0	K07082; UPF0755 protein
K23240	0	0	0.00265	0	K07085; putative transport protein
K23241	0	0	0.0124386	0	K07088; uncharacterized protein
K23242	0	0	0.00409792	0	K07089; uncharacterized protein
K23243	0	0	0.00351083	0	K07090; uncharacterized protein
K23245	0	0	0.00180426	0	lptF; lipopolysaccharide export system permease protein
K23256	0	0	0.0084664	0	K07095; uncharacterized protein
K23271	0	0	0.00409252	0	K07098; uncharacterized protein
K23332	0	0	0.00330229	0	K07099; uncharacterized protein
K23352	0	0	0.0102431	0	catE; catechol 2,3-dioxygenase [EC:1.13.11.2]
K23424	0	0	0.0023394	0	K07105; uncharacterized protein
K23514	0	0	0.0051036	0	murQ; N-acetylmuramic acid 6-phosphate etherase [EC:4.2.1.126]
K23531	0	0	8.02754e-05	0	ybgC; acyl-CoA thioester hydrolase [EC:3.1.2.-]
K23545	0	0	0.00924175	0	K07112; uncharacterized protein
K23546	0	0	0.0079604	0	yfbK; Ca-activated chloride channel homolog
K23547	0	0	0.013392	0	K07118; uncharacterized protein
K23567	0	0	0.00081885	0	K07124; uncharacterized protein
K23676	0	0	0.0183835	0	K07126; uncharacterized protein
K23773	0	0	0.00977495	0	K07129; uncharacterized protein
K23777	0	0	0.00620749	0	K07133; uncharacterized protein
K23778	0	0	0.00532313	0	K07137; uncharacterized protein
K23779	0	0	0.00448849	0	K07138; uncharacterized protein
K23989	0	0	0.0276368	0	K07139; uncharacterized protein
K23991	0	0	0.0461054	0	mocA; molybdenum cofactor cytidylyltransferase [EC:2.7.7.76]
K00253	0	0	0	6.39579e-05	K07150; uncharacterized protein
K00263	0	0	0	7.47607e-05	hipA; serine/threonine-protein kinase HipA [EC:2.7.11.1]
K00284	0	0	0	0.000235156	pxpA; 5-oxoprolinase (ATP-hydrolysing) subunit A [EC:3.5.2.9]
K00441	0	0	0	0.000581702	K07164; uncharacterized protein
K00698	0	0	0	8.51342e-06	K07166; ACT domain-containing protein
K00727	0	0	0	4.78611e-05	mazF, ndoA, chpA; mRNA interferase MazF [EC:3.1.-.-]
K01389	0	0	0	9.21452e-05	mazE, chpAI; antitoxin MazE
K02510	0	0	0	0.000706471	luxS; S-ribosylhomocysteine lyase [EC:4.4.1.21]
K02877	0	0	0	0.00555289	phoH2; PhoH-like ATPase
K03519	0	0	0	0.00011511	K07177; Lon-like protease
K04381	0	0	0	8.3131e-05	prkA; serine protein kinase
K04437	0	0	0	1.28059e-05	FLOT; flotillin
K04595	0	0	0	6.11678e-05	K07216; hemerythrin
K04622	0	0	0	0.00671694	K07217; Mn-containing catalase
K04631	0	0	0	0.000346832	nosD; nitrous oxidase accessory protein
K04961	0	0	0	9.74393e-05	K07219; putative molybdopterin biosynthesis protein
K04963	0	0	0	0.000151954	K07220; uncharacterized protein
K04966	0	0	0	2.29648e-05	oprO_P; phosphate-selective porin OprO and OprP
K05125	0	0	0	0.000378811	yfeX; porphyrinogen peroxidase [EC:1.11.1.-]
K05222	0	0	0	4.17086e-05	p19, ftrA; periplasmic iron binding protein
K05658	0	0	0	2.09616e-05	TC.ZIP, zupT, ZRT3, ZIP2; zinc transporter, ZIP family
K05678	0	0	0	6.88228e-05	chrA; chromate transporter
K05753	0	0	0	0.000107169	hoxN, nixA; nickel/cobalt transporter (NiCoT) family protein
K06689	0	0	0	0.000287739	FTR, FTH1, efeU; high-affinity iron transporter
K06952	0	0	0	0.00064423	ttuC, dmlA; tartrate dehydrogenase/decarboxylase / D-malate dehydrogenase [EC:1.1.1.93 4.1.1.73 1.1.1.83]
K07130	0	0	0	0.00043025	aldA; lactaldehyde dehydrogenase / glycolaldehyde dehydrogenase [EC:1.2.1.22 1.2.1.21]
K08450	0	0	0	0.000187224	gabT; 4-aminobutyrate aminotransferase / (S)-3-amino-2-methylpropionate transaminase / 5-aminovalerate transaminase [EC:2.6.1.19 2.6.1.22 2.6.1.48]
K08836	0	0	0	0.000216484	dacC, dacA, dacD; serine-type D-Ala-D-Ala carboxypeptidase (penicillin-binding protein 5/6) [EC:3.4.16.4]
K08848	0	0	0	4.31394e-05	dacB; serine-type D-Ala-D-Ala carboxypeptidase/endopeptidase (penicillin-binding protein 4) [EC:3.4.16.4 3.4.21.-]
K08859	0	0	0	8.52773e-05	vanY; zinc D-Ala-D-Ala carboxypeptidase [EC:3.4.17.14]
K09042	0	0	0	3.899e-05	pqqL; zinc protease [EC:3.4.24.-]
K09176	0	0	0	0.00340851	licD; lipopolysaccharide cholinephosphotransferase [EC:2.7.8.-]
K09205	0	0	0	7.06828e-05	rgpF; rhamnosyltransferase [EC:2.4.1.-]
K09223	0	0	0	0.000895197	acm; lysozyme
K09273	0	0	0	3.20505e-05	SAM50, TOB55, bamA; outer membrane protein insertion porin family
K09299	0	0	0	5.58738e-05	srtA; sortase A [EC:3.4.22.70]
K09364	0	0	0	0.000279297	chaA, CAX; Ca2+:H+ antiporter
K09433	0	0	0	5.74477e-05	yrbG; cation:H+ antiporter
K09515	0	0	0	0.000933185	msrA; peptide-methionine (S)-S-oxide reductase [EC:1.8.4.11]
K10597	0	0	0	0.000279297	msrB; peptide-methionine (R)-S-oxide reductase [EC:1.8.4.12]
K10703	0	0	0	3.41968e-05	pphA; serine/threonine protein phosphatase 1 [EC:3.1.3.16]
K10844	0	0	0	2.81157e-05	rsbU_P; phosphoserine phosphatase RsbU/P [EC:3.1.3.3]
K10877	0	0	0	0.000181357	mod; adenine-specific DNA-methyltransferase [EC:2.1.1.72]
K11290	0	0	0	8.79958e-05	K07318; adenine-specific DNA-methyltransferase [EC:2.1.1.72]
K11421	0	0	0	0.000995569	yhdJ; adenine-specific DNA-methyltransferase [EC:2.1.1.72]
K11427	0	0	0	8.01263e-05	prmB; ribosomal protein L3 glutamine methyltransferase [EC:2.1.1.298]
K11651	0	0	0	0.000559882	ytfE, scdA; regulator of cell morphogenesis and NO signaling
K11804	0	0	0	0.000218988	higB-1; toxin HigB-1
K11979	0	0	0	6.05955e-05	bmpA, bmpB, tmpC; basic membrane protein A and related proteins
K12460	0	0	0	7.2686e-05	doc; death on curing protein
K12480	0	0	0	0.000113894	tfoX; DNA transformation protein and related proteins
K12617	0	0	0	0.00120712	pepO; putative endopeptidase [EC:3.4.24.-]
K12829	0	0	0	0.000112248	comM; magnesium chelatase family protein
K12898	0	0	0	0.000629349	ECM4, yqjG; glutathionyl-hydroquinone reductase [EC:1.8.5.7]
K13409	0	0	0	0.000121906	xdhC; xanthine dehydrogenase accessory factor
K13757	0	0	0	9.8727e-05	pgl; 6-phosphogluconolactonase [EC:3.1.1.31]
K03042	0	0	0	0	E3.2.1.1A; alpha-amylase [EC:3.2.1.1]
K03047	0	0	0	0	E3.2.1.22B, galA, rafA; alpha-galactosidase [EC:3.2.1.22]
K03049	0	0	0	0	TRM61, GCD14; tRNA (adenine57-N1/adenine58-N1)-methyltransferase catalytic subunit [EC:2.1.1.219 2.1.1.220]
K05284	0	0	0	0	ybaZ; methylated-DNA-protein-cysteine methyltransferase related protein
K05285	0	0	0	0	ypsC; putative N6-adenine-specific DNA methylase [EC:2.1.1.-]
K05288	0	0	0	0	ruvX; putative holliday junction resolvase [EC:3.1.-.-]
K05299	0	0	0	0	mrr; restriction system protein
K05303	0	0	0	0	mcrA; 5-methylcytosine-specific restriction enzyme A [EC:3.1.21.-]
K05305	0	0	0	0	mcrB; 5-methylcytosine-specific restriction enzyme B [EC:3.1.21.-]
K05308	0	0	0	0	K07454; putative restriction endonuclease
K05310	0	0	0	0	recT; recombination protein RecT
K05355	0	0	0	0	mutS2; DNA mismatch repair protein MutS2
K05359	0	0	0	0	K07457; endonuclease III related protein
K05375	0	0	0	0	vsr; DNA mismatch endonuclease, patch repair protein [EC:3.1.-.-]
K05389	0	0	0	0	ybjD; putative ATP-dependent endonuclease of the OLD family
K05449	0	0	0	0	yraN; putative endonuclease
K05456	0	0	0	0	K07461; putative endonuclease
K05521	0	0	0	0	recJ; single-stranded-DNA-specific exonuclease [EC:3.1.-.-]
K05528	0	0	0	0	cas4; CRISPR-associated exonuclease Cas4 [EC:3.1.12.1]
K05529	0	0	0	0	rstA1; phage replication initiation protein
K05532	0	0	0	0	mop; aldehyde oxidoreductase [EC:1.2.99.7]
K05533	0	0	0	0	dinJ; DNA-damage-inducible protein J
K05543	0	0	0	0	xtmA; phage terminase small subunit
K05544	0	0	0	0	ycaJ; putative ATPase
K05545	0	0	0	0	K07481; transposase, IS5 family
K05546	0	0	0	0	K07483; transposase
K05548	0	0	0	0	K07491; putative transposase
K05559	0	0	0	0	K07496; putative transposase
K05563	0	0	0	0	K07497; putative transposase
K05565	0	0	0	0	K07498; putative transposase
K05566	0	0	0	0	yprB; uncharacterized protein
K05567	0	0	0	0	nucS; endonuclease [EC:3.1.-.-]
K05568	0	0	0	0	K07504; predicted type IV restriction endonuclease
K05570	0	0	0	0	mgtC; putative Mg2+ transporter-C (MgtC) family protein
K05571	0	0	0	0	prsA; foldase protein PrsA [EC:5.2.1.8]
K05573	0	0	0	0	bcr, tcaB; MFS transporter, DHA1 family, multidrug resistance protein
K05574	0	0	0	0	kptA; putative RNA 2'-phosphotransferase [EC:2.7.1.-]
K05578	0	0	0	0	dtd, DTD; D-aminoacyl-tRNA deacylase [EC:3.1.1.96]
K05579	0	0	0	0	tsaC, rimN, SUA5; L-threonylcarbamoyladenylate synthase [EC:2.7.7.87]
K05586	0	0	0	0	queA; S-adenosylmethionine:tRNA ribosyltransferase-isomerase [EC:2.4.99.17]
K05587	0	0	0	0	GSP13; general stress protein 13
K05588	0	0	0	0	K07571; S1 RNA binding domain protein
K05597	0	0	0	0	yhbY; RNA-binding protein
K05605	0	0	0	0	K07576; metallo-beta-lactamase family protein
K05619	0	0	0	0	ysxB; uncharacterized protein
K05626	0	0	0	0	ygaC; uncharacterized protein
K05631	0	0	0	0	argK; LAO/AO transport system kinase [EC:2.7.-.-]
K05632	0	0	0	0	RP-L7A, rplGB; large subunit ribosomal protein L7A
K05633	0	0	0	0	phoR; two-component system, OmpR family, phosphate regulon sensor histidine kinase PhoR [EC:2.7.13.3]
K05636	0	0	0	0	kdpD; two-component system, OmpR family, sensor histidine kinase KdpD [EC:2.7.13.3]
K05637	0	0	0	0	vicK; two-component system, OmpR family, sensor histidine kinase VicK [EC:2.7.13.3]
K05662	0	0	0	0	mtrB; two-component system, OmpR family, sensor histidine kinase MtrB [EC:2.7.13.3]
K05665	0	0	0	0	phoB1, phoP; two-component system, OmpR family, alkaline phosphatase synthesis response regulator PhoP
K05668	0	0	0	0	kdpE; two-component system, OmpR family, KDP operon response regulator KdpE
K05674	0	0	0	0	vicR; two-component system, OmpR family, response regulator VicR
K05677	0	0	0	0	mtrA; two-component system, OmpR family, response regulator MtrA
K05681	0	0	0	0	nreB; two-component system, NarL family, sensor histidine kinase NreB [EC:2.7.13.3]
K05687	0	0	0	0	desR; two-component system, NarL family, response regulator DesR
K05692	0	0	0	0	nreC; two-component system, NarL family, response regulator NreC
K05693	0	0	0	0	spo0A; two-component system, response regulator, stage 0 sporulation protein A
K05701	0	0	0	0	lytS; two-component system, LytTR family, sensor histidine kinase LytS [EC:2.7.13.3]
K05715	0	0	0	0	lytT, lytR; two-component system, LytTR family, response regulator LytT
K05716	0	0	0	0	agrC, blpH, fsrC; two-component system, LytTR family, sensor histidine kinase AgrC [EC:2.7.13.3]
K05720	0	0	0	0	agrA, blpR, fsrA; two-component system, LytTR family, response regulator AgrA
K05727	0	0	0	0	zraR, hydG; two-component system, NtrC family, response regulator HydG
K05730	0	0	0	0	ycbA, glnK; two-component system, sensor histidine kinase YcbA [EC:2.7.13.3]
K05738	0	0	0	0	yesM; two-component system, sensor histidine kinase YesM [EC:2.7.13.3]
K05754	0	0	0	0	ycbB, glnL; two-component system, response regulator YcbB
K05756	0	0	0	0	yesN; two-component system, response regulator YesN
K05757	0	0	0	0	ndoAI; CopG family transcriptional regulator / antitoxin EndoAI
K05758	0	0	0	0	K07726; putative transcriptional regulator
K05766	0	0	0	0	K07727; putative transcriptional regulator
K05767	0	0	0	0	K07729; putative transcriptional regulator
K05784	0	0	0	0	carD; CarD family transcriptional regulator
K05797	0	0	0	0	nrdR; transcriptional repressor NrdR
K05824	0	0	0	0	antB; anti-repressor protein
K05826	0	0	0	0	ylxR; uncharacterized protein
K05827	0	0	0	0	MESO1, ERG25; methylsterol monooxygenase [EC:1.14.18.9]
K05828	0	0	0	0	senX3; two-component system, OmpR family, sensor histidine kinase SenX3 [EC:2.7.13.3]
K05829	0	0	0	0	regX3; two-component system, OmpR family, response regulator RegX3
K05830	0	0	0	0	desK; two-component system, NarL family, sensor histidine kinase DesK [EC:2.7.13.3]
K05831	0	0	0	0	uhpT; MFS transporter, OPA family, hexose phosphate transport protein UhpT
[truncated: 7,275 more rows]
